# Supplementary material
Source: PubMed Central journal article supplement (PMC3415565)

Supporting Information for:

**Merging Visible Light Photocatalysis and Transition Metal Catalysis in the  
Copper-Catalyzed Trifluoromethylation of Boronic Acids with CF<sub>3</sub>I**

Yingda Ye and Melanie S. Sanford\*

*Department of Chemistry, University of Michigan, 930 North University Avenue, Ann Arbor,  
Michigan 48109*

**General Procedures**

NMR spectra were obtained on a Varian MR400 (400 MHz for <sup>1</sup>H; 377 MHz for <sup>19</sup>F; 100 MHz for <sup>13</sup>C), a Varian vnmrs 500 (500MHz for <sup>1</sup>H), or a Varian vnmrs 700 (700MHz for <sup>1</sup>H; 175 MHz for <sup>13</sup>C) spectrometer. <sup>1</sup>H and <sup>13</sup>C chemical shifts are reported in parts per million (ppm) relative to TMS, with the residual solvent peak used as an internal reference. <sup>19</sup>F NMR spectra are referenced based on the internal standard 1,3,5-trifluorobenzene, which appears at –107.40 ppm. <sup>1</sup>H and <sup>19</sup>F multiplicities are reported as follows: singlet (s), doublet (d), triplet (t), doublet of doublets (dd), doublet of triplets (dt) and multiplet (m). Kugelrohr distillations were performed on a Buchi Glass Oven B-580 Kugelrohr.

**Materials and Methods**

CuOAc was obtained from Strem Chemical. Aryl boronic acids were obtained from Frontier Scientific. 1,3,5-Trifluorobenzene, 4-(trifluoromethyl)benzonitrile, and iodobenzotrifluoride were obtained from Oakwood Products. 4-Fluorobenzotrifluoride and 4-(trifluoromethyl)pyridine were obtained from Matrix Scientific. Trifluorotoluene was obtained from Acros. Potassium carbonate was obtained from Fisher Scientific. CF<sub>3</sub>SO<sub>2</sub>Na, and 4-(trifluoromethyl)anisole were obtained from SynQuest Laboratories. Ru(bpy)<sub>3</sub>Cl<sub>2</sub>•6H<sub>2</sub>O, Ru(phen)<sub>3</sub>Cl<sub>2</sub>, CF<sub>3</sub>SO<sub>2</sub>Cl, 1,4-bis(trifluoromethyl)benzene, 4-(trifluoromethyl)phenol, estrone and dry DMF, DMA, DMSO, 1,4-dioxane, diglyme and NMP were obtained from Sigma Aldrich. All syntheses were conducted using standard Schlenk techniques or in a nitrogen atmosphere glovebox unless otherwise stated.

## Experimental Details

### Preparation of CF<sub>3</sub>I Stock Solution

DMF (20 mL) was added to a Schlenk graduated cylinder under nitrogen (see picture below for apparatus). The vessel and solvent were weighed. Next, CF<sub>3</sub>I was bubbled through the DMF solution using a long needle until the total volume of the solution reached approximately 25 mL. The vessel was sealed weighed again. The concentration of the CF<sub>3</sub>I stock solution was then calculated based on the mass of CF<sub>3</sub>I added and the total volume of the solution.

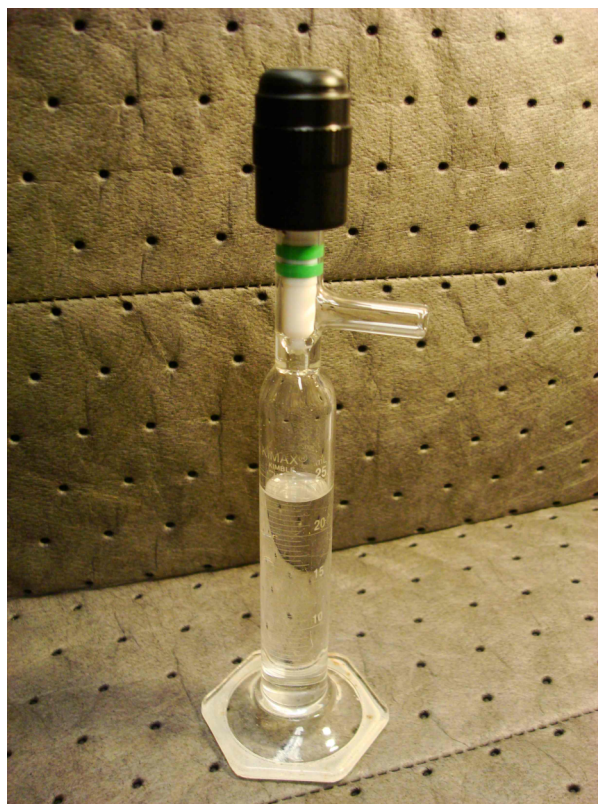

### Solvent Screening for Trifluoromethylation of Aryl Boronic Acids

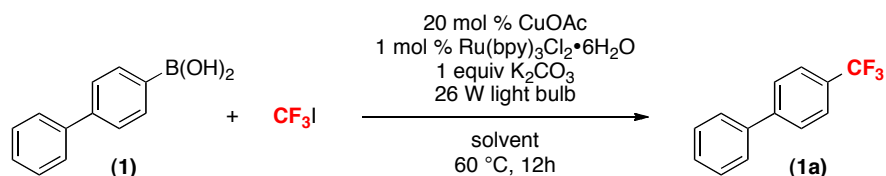

In a glovebox, substrate **1** (9.9 mg, 0.05 mmol, 1 equiv), CuOAc (1.2 mg, 0.01 mmol, 0.2 equiv),  $\text{Ru(bpy)}_3\text{Cl}_2 \cdot 6\text{H}_2\text{O}$  (0.37 mg, 0.0005 mmol, 0.01 equiv), and  $\text{K}_2\text{CO}_3$  (6.9 mg, 0.05 mmol, 1 equiv) were weighed into a 4 mL vial.  $\text{CF}_3\text{I}$  (0.25 mmol, 5 equiv) was added to the reaction vial as a stock solution in reaction solvent. Additional solvent was added to make the total amount of solvent 0.3 mL. The vial was sealed with a Teflon-lined cap, removed from the glove box, and placed in an oil bath at  $60^\circ\text{C}$  with two 26 W compact fluorescent light bulbs (one on either side of the vial approximately 5 cm away). The reaction mixture was allowed to stir for 12 h. The resulting red solution was cooled to room temperature and diluted with  $\text{CH}_2\text{Cl}_2$  (2 mL). 1,3,5-trifluorobenzene and naphthalene (0.05 mmol, 1 equiv) were added as internal standards, and the reaction was analyzed by  $^{19}\text{F}$  NMR spectroscopy and GC. The yields of **1a** are listed in Table S1.

**Table S1.** Solvent Screen for Reaction Between **1** and  $\text{CF}_3\text{I}$

| Entry | Solvent     | Yield of <b>1a</b> |
|-------|-------------|--------------------|
| 1     | 1,4-Dioxane | 7%                 |
| 2     | Diglyme     | 21%                |
| 3     | NMP         | 65%                |
| 4     | DMA         | 72%                |
| 5     | DMSO        | 73%                |
| 6     | DMF         | 76%                |

### **Reactivity of Aryl Boronic Acid under MacMillan's Reaction Conditions<sup>1</sup>**

In a glovebox, substrate **1** (9.9 mg, 0.05 mmol, 1 equiv), Ru(phen)<sub>3</sub>Cl<sub>2</sub> (0.36 mg, 0.0005 mmol, 0.01 equiv), and K<sub>2</sub>HPO<sub>4</sub> (26.1 mg, 0.15 mmol, 3 equiv) were weighed into a 4 mL vial. MeCN (0.4 mL) was added. The vial was fitted with a screw cap containing a silicone septum and removed from the glove box. The CF<sub>3</sub>SO<sub>2</sub>Cl (10.64 µL, 2 equiv) was added by syringe, and the vial was sealed with parafilm and placed in a water bath at room temperature with two 26 W compact fluorescent light bulbs (one on either side of the vial approximately 5 cm away). The reaction mixture was allowed to stir for 24 h. The reaction was quenched with water (1 mL) and extracted with ethyl acetate (2 x 1 mL) and CH<sub>2</sub>Cl<sub>2</sub> (1 x 1 mL). The combined organic layers were dried over MgSO<sub>4</sub>. 1,3,5-trifluorobenzene and naphthalene (0.05 mmol, 1 equiv) were added as internal standards, and the reaction was analyzed by <sup>1</sup>H NMR and <sup>19</sup>F NMR spectroscopy. The starting material **1** was recovered in nearly quantitative yield, and trifluoromethylated product **1a** was formed in less than 2% yield.

### **Reactivity of Aryl Boronic Acid under Baran's Reaction Conditions<sup>2</sup>**

To a solution of substrate **1** (49.5 mg, 0.25 mmol, 1.0 equiv) and sodium trifluoromethylsulfinate (117 mg, 0.75 mmol, 3.0 equiv) in dichloromethane (1 mL) and water (0.4 mL) at 0 °C was slowly added tert-butylhydroperoxide (70% solution in water, 0.17 mL, 1.25 mmol, 5.0 equiv) with vigorous stirring. The reaction was warmed to room temperature and stirred for 24 h. The resulting solution was partitioned between dichloromethane (2 mL) and saturated sodium bicarbonate (2 mL). The organic layer was separated, and the aqueous layer was extracted with dichloromethane (3 x 2 mL). The combined organic layers were dried over MgSO<sub>4</sub>. 1,3,5-trifluorobenzene and naphthalene (0.25 mmol, 1 equiv) were added as internal standards, and the reaction was analyzed by <sup>19</sup>F NMR spectroscopy and GCMS. No trifluoromethylated product was observed. 4-Hydroxybiphenyl was formed in 75% yield.

### Standard Procedure for Trifluoromethylation of Aryl Boronic Acids

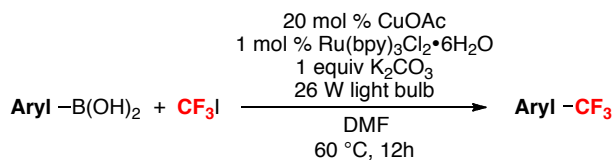

In a glovebox, the boronic acid substrate **1** (0.25 mmol, 1 equiv), CuOAc (6 mg, 0.05 mmol, 0.2 equiv), Ru(bpy)<sub>3</sub>Cl<sub>2</sub>•6H<sub>2</sub>O (1.85 mg, 0.0025 mmol, 0.01 equiv), and K<sub>2</sub>CO<sub>3</sub> (35 mg, 0.25 mmol, 1 equiv) were weighed into a 20 mL vial. CF<sub>3</sub>I (1.25 mmol, 5 equiv) was added to the reaction vial as a stock solution in DMF. Additional DMF was added to make the total volume 1.5 mL. The vial was sealed with a Teflon-lined cap, removed from the glove box, and placed in an oil bath at 60 °C with two 26 W compact fluorescent light bulbs (one on either side of the vial approximately 5 cm away). The reaction mixture was allowed to stir for 12 h. The resulting red solution was cooled to room temperature. 1,3,5-Trifluorobenzene (0.25 mmol, 1 equiv) was added as an internal standard, and the reaction was analyzed by <sup>19</sup>F NMR spectroscopy. GCMS analysis was performed on a Shimadzu GCMS-QP2010 plus gas chromatograph mass spectrometer. The products were separated on a 30 m length by 0.25 mm id, RESTEK XTl-5 column coated with a 0.25 μm film. Helium was employed as the carrier gas, with a constant column flow of 1.5 mL/min. The injector temperature was held constant at 250 °C. The GC oven temperature program was as follows: 40 °C hold 6 min, ramp 15 °C/min to 250 °C, and hold for 3 min.

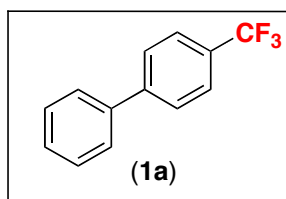

The reaction was performed on a 0.25 mmol scale using the standard procedure. The trifluoromethylated product **1a** was formed in 80% yield. The product showed a <sup>19</sup>F NMR signal at –62.4 ppm in DCE (lit. –62.4 ppm in CDCl<sub>3</sub>).<sup>3</sup> The identity of the product was further confirmed by GCMS analysis, where the product peak was observed at 15.28 min.

This reaction of substrate **1** was also conducted on a 5 mmol scale. For the 5 mmol scale reaction, substrate **1** (0.99 g, 5 mmol, 1 equiv), CuOAc (122 mg, 1 mmol, 0.2 equiv), K<sub>2</sub>CO<sub>3</sub> (0.69 g, 5 mmol, 1 equiv), Ru(bpy)<sub>3</sub>Cl<sub>2</sub>•6H<sub>2</sub>O (37.4 mg, 0.05 mmol, 0.01 equiv), CF<sub>3</sub>I (25 mmol, 5 equiv) and DMF (30 mL) were used. The reaction was conducted in a 250 mL round bottom flask, and the yield was determined to be 82% by <sup>19</sup>F NMR spectroscopy. The reaction mixture was then diluted with Et<sub>2</sub>O (50 mL), and the resulting mixture was washed with water (3 x 50 mL) and brine (1 x 50 mL) and then dried over magnesium sulfate. The solvent was removed by rotary evaporation, and the product was purified by column chromatography on silica gel using pentane as the eluent. Compound **1a** was obtained as white crystalline solid (776 mg, 70% yield, mp = 64.0-64.4 °C). The <sup>1</sup>H, <sup>13</sup>C and <sup>19</sup>F NMR spectroscopic data were identical to that reported previously in the literature.<sup>3</sup>

Mass spectrum of product peak (15.28 min) from GCMS of Cu/Ru-catalyzed reaction between [1,1'-biphenyl]-4-ylboronic acid and CF<sub>3</sub>I

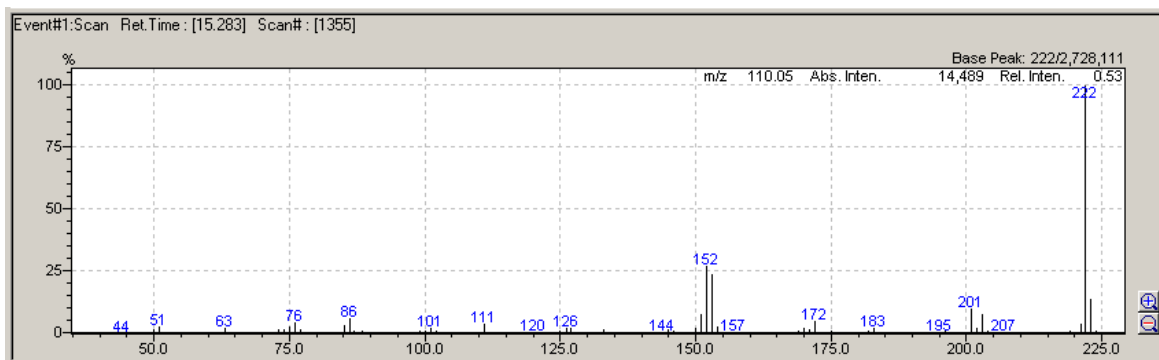

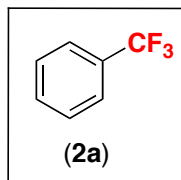

The reaction was performed on a 0.25 mmol scale using the standard procedure. The  $^{19}\text{F}$  NMR spectral data for **2a** matched that of an authentic sample (Acros, s,  $-62.3$  ppm). The trifluoromethylated product was formed in 70% yield. The identity of the product was further confirmed by GCMS analysis, where the product peak was observed at 3.64 min.

$^{19}\text{F}$  NMR spectrum of crude reaction mixture for Cu/Ru-catalyzed reaction of phenylboronic acid with  $\text{CF}_3\text{I}$  (internal standard = 1,3,5-trifluorobenzene at  $-107.4$  ppm)

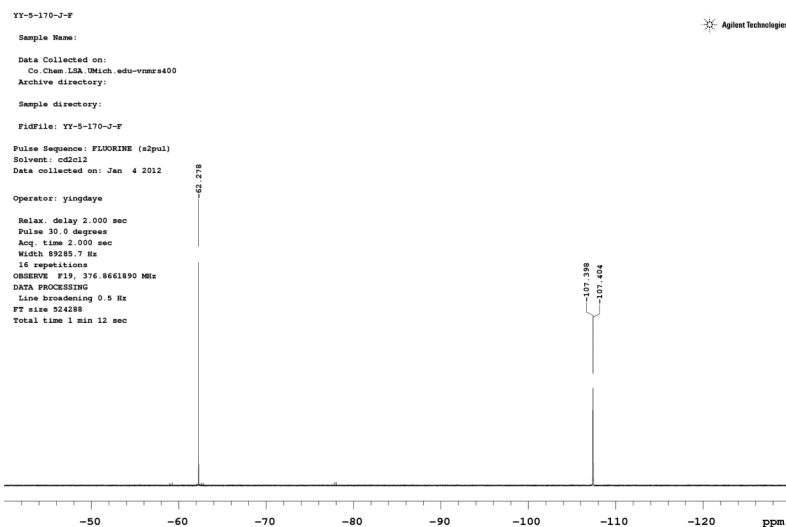

Mass spectrum of product peak (3.64 min) from GCMS of Cu/Ru-catalyzed reaction between phenylboronic acid and  $\text{CF}_3\text{I}$

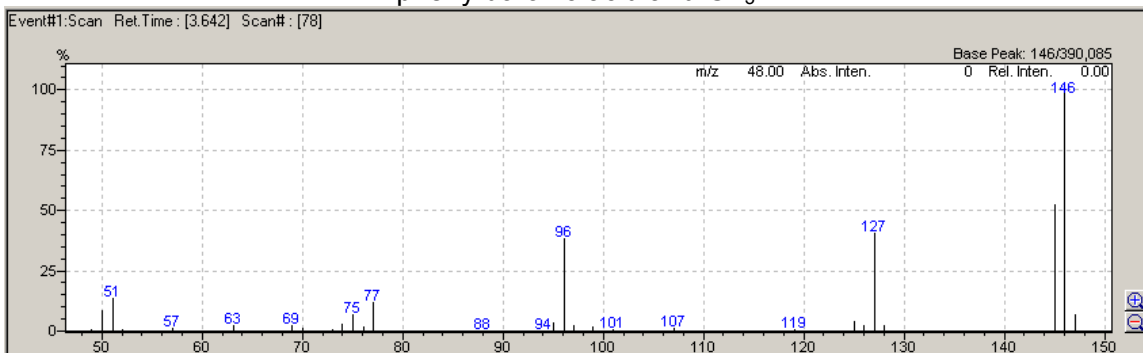

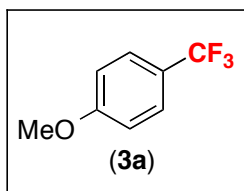

The reaction was performed on a 0.25 mmol scale using the standard procedure. The  $^{19}\text{F}$  NMR spectral data for **3a** matched that of an authentic sample (SynQuest Labs, s,  $-61.0$  ppm). The trifluoromethylated product was formed in 84% yield. The identity of the product was further confirmed by GCMS analysis, where the product peak was observed at 10.28 min.

$^{19}\text{F}$  NMR spectrum of crude reaction mixture for Cu/Ru-catalyzed reaction of (4-methoxyphenyl)boronic acid with  $\text{CF}_3\text{I}$  (internal standard = 1,3,5-trifluorobenzene at  $-107.4$  ppm)

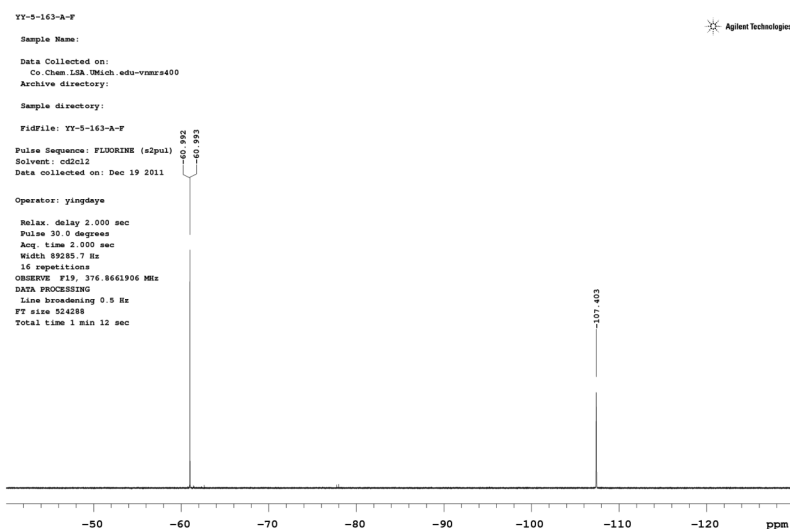

Mass spectrum of product peak (10.28 min) from GCMS of Cu/Ru-catalyzed reaction between (4-methoxyphenyl)boronic acid and  $\text{CF}_3\text{I}$

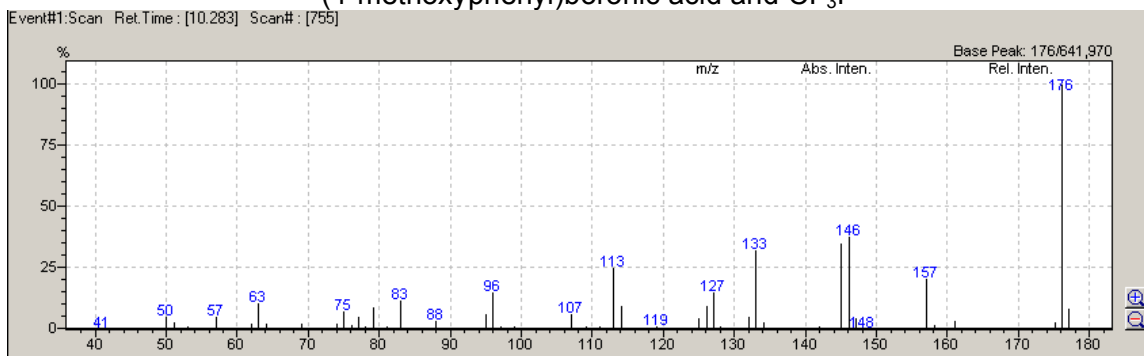

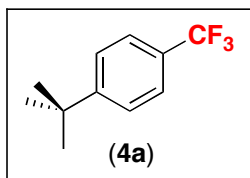

The reaction was performed on a 0.25 mmol scale using the standard procedure. The trifluoromethylated product **4a** was formed in 86% yield. The product showed a  $^{19}\text{F}$  NMR signal at  $-61.8$  ppm in DCE (lit.  $-62.2$  ppm in  $\text{CDCl}_3$ ).<sup>4</sup> The identity of the product was further confirmed by GCMS analysis, where the product peak was observed at 11.30 min.

This reaction of substrate **4** was also conducted on a 1 mmol scale. For the 1 mmol scale reaction, substrate **4** (178 mg, 1 mmol, 1 equiv),  $\text{CuOAc}$  (24 mg, 0.2 mmol, 0.2 equiv),  $\text{K}_2\text{CO}_3$  (138 mg, 1 mmol, 1 equiv),  $\text{Ru}(\text{bpy})_3\text{Cl}_2 \cdot 6\text{H}_2\text{O}$  (7.4 mg, 0.01 mmol, 0.01 equiv),  $\text{CF}_3\text{I}$  (5 mmol, 5 equiv) and DMF (6 mL) were used. The reaction was conducted in a 25 mL round bottom flask. The reaction mixture was then diluted with  $\text{Et}_2\text{O}$  (40 mL), and the resulting mixture was washed with water (2 x 40 mL), saturated aqueous  $\text{CaCl}_2$  (1 x 40 mL), and brine (1 x 40 mL) and then dried over magnesium sulfate. The solvent was removed by rotary evaporation at  $0^\circ\text{C}$ , and the product was purified by Kugelrohr distillation at  $80^\circ\text{C}$  at 10 mm Hg. The isolated product **4a** (145 mg, 72% yield) was 96% pure, and contained traces (4%) of the corresponding protodeboronation byproduct *tert*-butylbenzene, which was not easily separable by chromatography on silica gel. The  $^1\text{H}$ ,  $^{13}\text{C}$  and  $^{19}\text{F}$  NMR spectroscopic data were identical to that reported previously in the literature.<sup>4</sup>

Mass spectrum of product peak (11.30 min) from GCMS of Cu/Ru-catalyzed reaction between (4-(*tert*-butyl)phenyl)boronic acid and  $\text{CF}_3\text{I}$

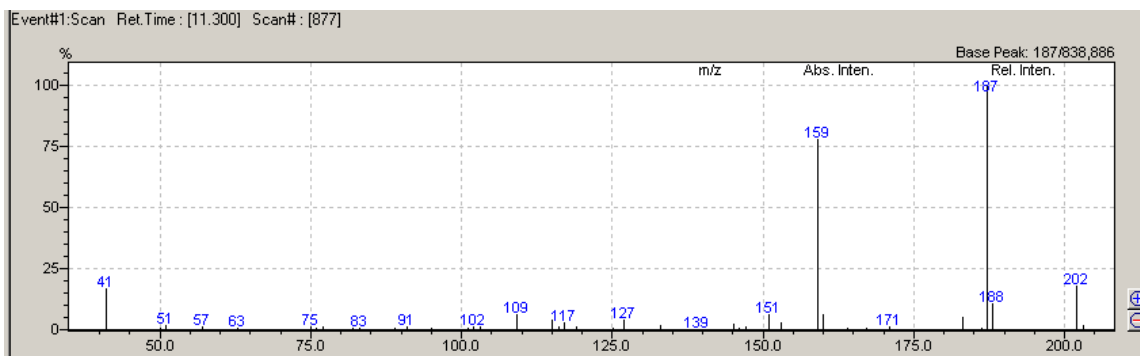

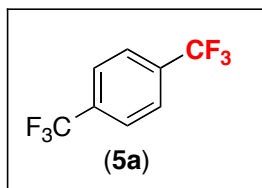

The reaction was performed on a 0.25 mmol scale using 50 mol % of CuOAc (15 mg, 0.125 mmol, 0.5 equiv) under otherwise identical conditions to the standard procedure. The  $^{19}\text{F}$  NMR spectral data for **5a** matched that of an authentic sample (Aldrich, s,  $-62.8$  ppm). The trifluoromethylated product was formed in 64% yield. The identity of the product was further confirmed by GCMS analysis, where the product peak was observed at 3.56 min.

$^{19}\text{F}$  NMR spectrum of crude reaction mixture for Cu/Ru-catalyzed reaction of (4-(trifluoromethyl)phenyl)boronic acid with  $\text{CF}_3\text{I}$  (internal standard = 1,3,5-trifluorobenzene at  $-107.4$  ppm)

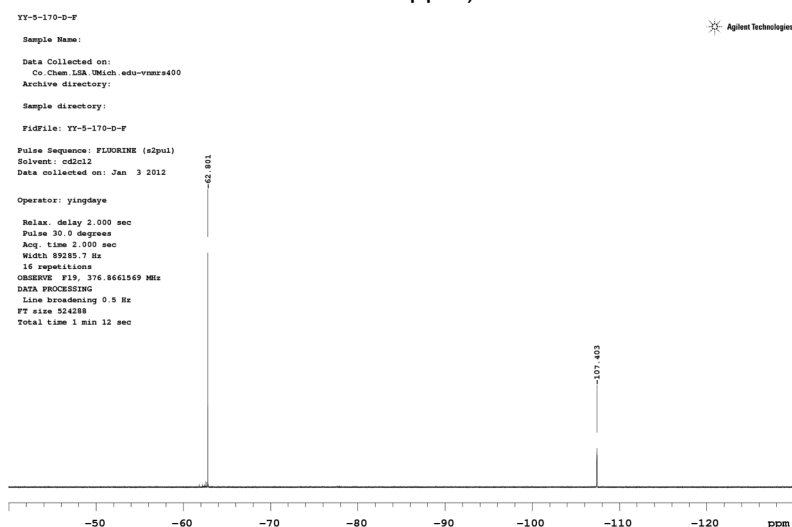

Mass spectrum of product peak (3.56 min) from GCMS of Cu/Ru-catalyzed reaction between (4-(trifluoromethyl)phenyl)boronic acid and  $\text{CF}_3\text{I}$

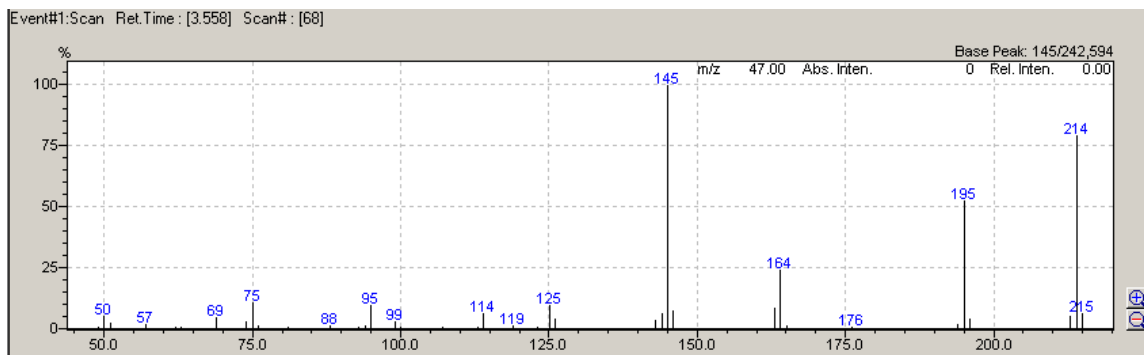

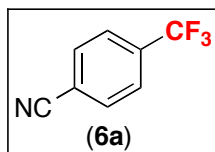

The reaction was performed on a 0.25 mmol scale using the standard procedure. The  $^{19}\text{F}$  NMR spectral data for **6a** matched that of an authentic sample (Oakwood, s,  $-63.1$  ppm). The trifluoromethylated product was formed in 84% yield. The identity of the product was further confirmed by GCMS analysis, where the product peak was observed at 10.37 min.

This reaction of substrate **6** was also conducted on a 1 mmol scale. For the 1 mmol scale reaction, substrate **6** (147 mg, 1 mmol, 1 equiv), CuOAc (24 mg, 0.2 mmol, 0.2 equiv),  $\text{K}_2\text{CO}_3$  (138 mg, 1 mmol, 1 equiv),  $\text{Ru}(\text{bpy})_3\text{Cl}_2 \cdot 6\text{H}_2\text{O}$  (7.4 mg, 0.01 mmol, 0.01 equiv),  $\text{CF}_3\text{I}$  (5 mmol, 5 equiv) and DMF (6 mL) were used. The reaction was conducted in a 25 mL round bottom flask. The reaction mixture was then diluted with  $\text{Et}_2\text{O}$  (40 mL), and the resulting mixture was washed with water (2 x 40 mL), saturated aqueous  $\text{CaCl}_2$  (1 x 40 mL), and brine (1 x 40 mL) and then dried over magnesium sulfate. The solvent was removed by rotary evaporation at  $0^\circ\text{C}$ , and the product was purified by Kugelrohr distillation at  $90^\circ\text{C}$  at 10 mm Hg. The isolated product **6a** (112 mg, 65% yield) was 97% pure, and contained traces (3%) of the corresponding protodeboronation byproduct benzonitrile. If necessary, the protodeboronation product can be completely removed by subsequent column chromatographic purification on silica gel using 2% diethyl ether in pentane as the eluent. After this second purification, compound **6a** was obtained as a white solid (89 mg, 52% yield). The  $^1\text{H}$ ,  $^{13}\text{C}$  and  $^{19}\text{F}$  NMR spectroscopic data were identical to the authentic sample.

Mass spectrum of product peak (10.37 min) from GCMS of Cu/Ru-catalyzed reaction between (4-(cyano)phenyl)boronic acid and  $\text{CF}_3\text{I}$

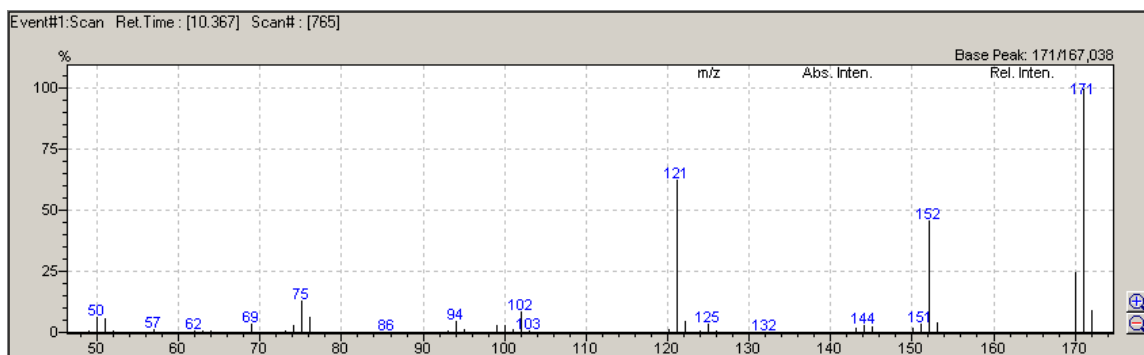

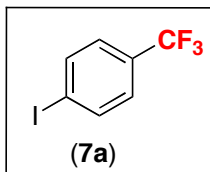

The reaction was performed on a 0.25 mmol scale using the standard procedure. The  $^{19}\text{F}$  NMR spectral data for **7a** matched that of an authentic sample (Oakwood, s,  $-62.5$  ppm). The trifluoromethylated product was formed in 73% yield. The identity of the product was further confirmed by GCMS analysis, where the product peak was observed at 11.49 min.

This reaction of substrate **7** was also conducted on a 1 mmol scale. For the 1 mmol scale reaction, substrate **7** (248 mg, 1 mmol, 1 equiv), CuOAc (24 mg, 0.2 mmol, 0.2 equiv),  $\text{K}_2\text{CO}_3$  (138 mg, 1 mmol, 1 equiv),  $\text{Ru}(\text{bpy})_3\text{Cl}_2 \cdot 6\text{H}_2\text{O}$  (7.4 mg, 0.01 mmol, 0.01 equiv),  $\text{CF}_3\text{I}$  (5 mmol, 5 equiv) and DMF (6 mL) were used. The reaction was conducted in a 25 mL round bottom flask. The reaction mixture was then diluted with  $\text{Et}_2\text{O}$  (40 mL), and the resulting mixture was washed with water (2 x 40 mL), saturated aqueous  $\text{CaCl}_2$  (1 x 40 mL), and brine (1 x 40 mL) and then dried over magnesium sulfate. The solvent was removed by rotary evaporation at  $0^\circ\text{C}$ , and the product was purified by Kugelrohr distillation at  $100^\circ\text{C}$  at 10 mm Hg. The isolated product **7a** (174 mg, 64% yield) was 96% pure, and contained traces (4%) of the corresponding protodeboronation byproduct iodobenzene, which was not easily separable by chromatography on silica gel. The  $^1\text{H}$ ,  $^{13}\text{C}$  and  $^{19}\text{F}$  NMR spectroscopic data were identical to the authentic sample.

Mass spectrum of product peak (11.49 min) from GCMS of Cu/Ru-catalyzed reaction between (4-(iodo)phenyl)boronic acid and  $\text{CF}_3\text{I}$

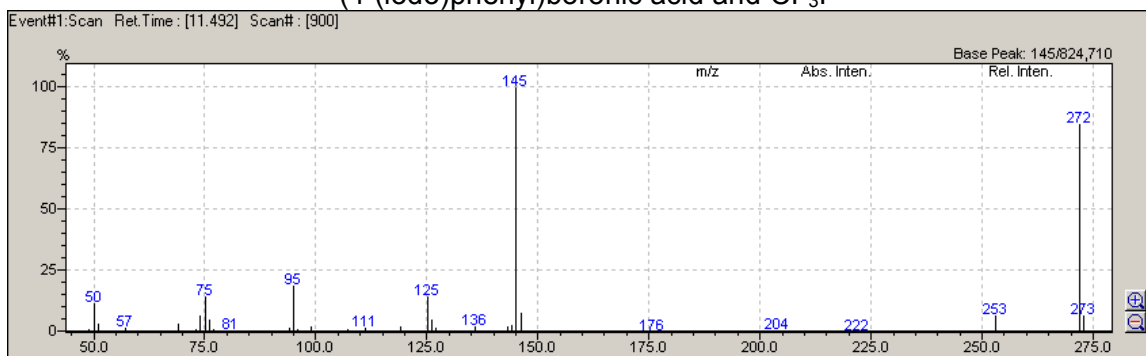

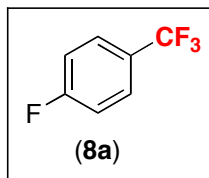

The reaction was performed on a 0.25 mmol scale using the standard procedure. The  $^{19}\text{F}$  NMR spectral data for **8a** matched that of an authentic sample (Matrix Scientific, s, 3F,  $-61.6$  ppm; m, 1F,  $-107.5$  ppm). The trifluoromethylated product was formed in 93% yield. The identity of the product was further confirmed by GCMS analysis, where the product peak was observed at 3.42 min.

$^{19}\text{F}$  NMR spectrum of crude reaction mixture for Cu/Ru-catalyzed reaction of (4-(fluoro)phenyl)boronic acid with  $\text{CF}_3\text{I}$  (internal standard = 1,3,5-trifluorobenzene at  $-107.4$  ppm)

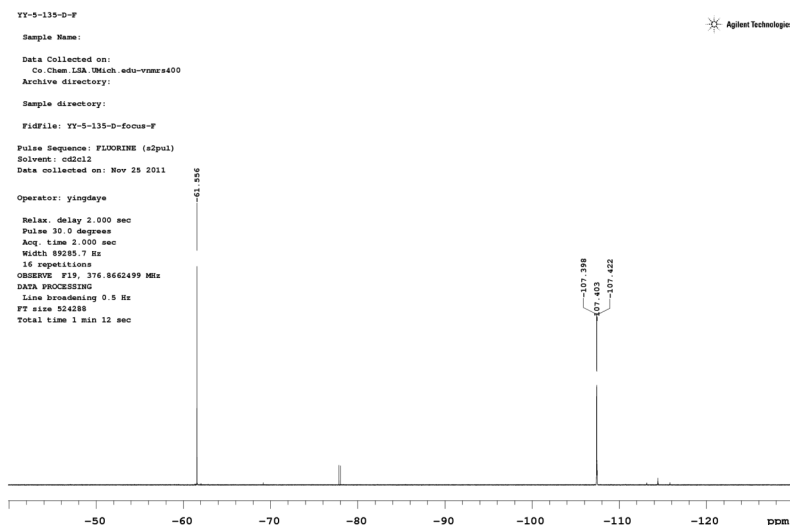

Mass spectrum of product peak (3.42 min) from GCMS of Cu/Ru-catalyzed reaction between (4-(fluoro)phenyl)boronic acid and  $\text{CF}_3\text{I}$

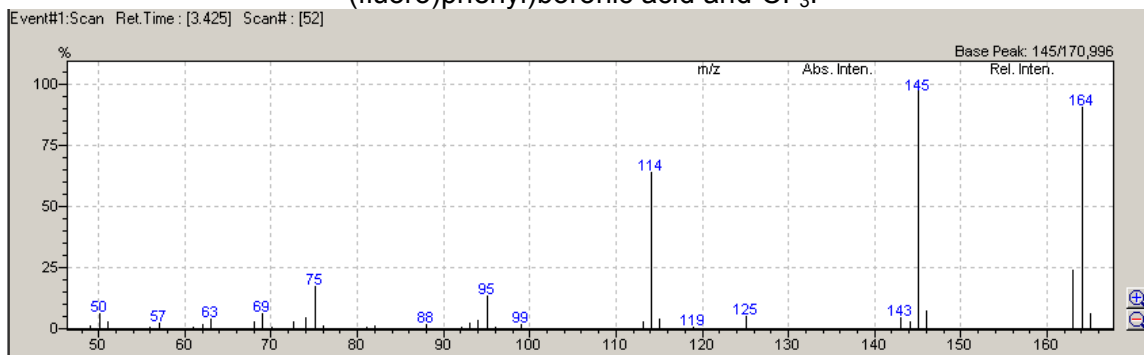

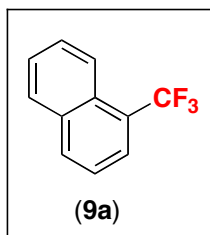

The reaction was performed on a 0.25 mmol scale using the standard procedure. The trifluoromethylated product **9a** was formed in 57% yield. The product showed a  $^{19}\text{F}$  NMR signal at  $-59.3$  ppm in DCE (lit.  $-59.72$  ppm in  $\text{CDCl}_3$ ).<sup>3</sup> The identity of the product was further confirmed by GCMS analysis, where the product peak was observed at 13.51 min.

This reaction of substrate **9** was also conducted on a 1 mmol scale. For the 1 mmol scale reaction, substrate **9** (172 mg, 1 mmol, 1 equiv),  $\text{CuOAc}$  (24 mg, 0.2 mmol, 0.2 equiv),  $\text{K}_2\text{CO}_3$  (138 mg, 1 mmol, 1 equiv),  $\text{Ru}(\text{bpy})_3\text{Cl}_2 \cdot 6\text{H}_2\text{O}$  (7.4 mg, 0.01 mmol, 0.01 equiv),  $\text{CF}_3\text{I}$  (5 mmol, 5 equiv) and DMF (6 mL) were used. The reaction was conducted in a 25 mL round bottom flask. The reaction mixture was then diluted with  $\text{Et}_2\text{O}$  (40 mL), and the resulting mixture was washed with water (2 x 40 mL), saturated aqueous  $\text{CaCl}_2$  (1 x 40 mL), and brine (1 x 40 mL) and then dried over magnesium sulfate. The solvent was removed by rotary evaporation at  $0^\circ\text{C}$ , and the product was purified by Kugelrohr distillation at  $120^\circ\text{C}$  at 10 mm Hg. Compound **9a** was obtained as a 5:1 mixture with the protodeboronation product naphthalene (103 mg in total, 46% yield for **9a**). Subsequent purification of this sample by column chromatography on silica gel using pentane as the eluent afforded **9a** as a pure clear liquid (79 mg, 40% yield). The  $^1\text{H}$ ,  $^{13}\text{C}$  and  $^{19}\text{F}$  NMR spectroscopic data were identical to that reported previously in the literature.<sup>3</sup>

Mass spectrum of product peak (13.51 min) from GCMS of Cu/Ru-catalyzed reaction between naphthalen-1-ylboronic acid and  $\text{CF}_3\text{I}$

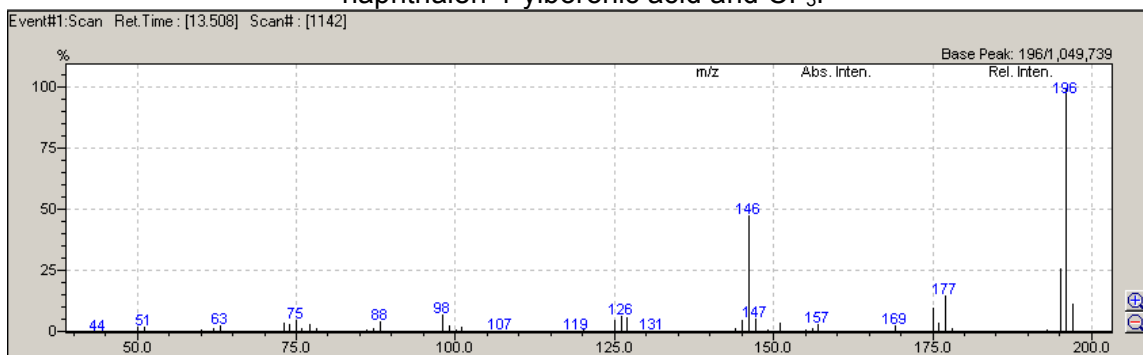

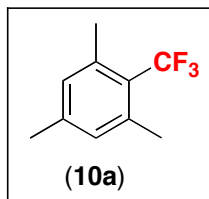

The reaction was performed on a 0.25 mmol scale using 50 mol % of CuOAc (15 mg, 0.125 mmol, 0.5 equiv) under otherwise identical conditions to the standard procedure. The trifluoromethylated product **10a** was formed in 45% yield. The product showed a  $^{19}\text{F}$  NMR signal at  $-53.2$  ppm in DCE (lit.  $-55.0$  ppm in  $\text{CDCl}_3$ ).<sup>5a</sup> The identity of the product was further confirmed by GCMS analysis, where the product peak was observed at 11.45 min.

This reaction of substrate **10** was also conducted on a 1 mmol scale. For the 1 mmol scale reaction, substrate **10** (164 mg, 1 mmol, 1 equiv), CuOAc (60 mg, 0.5 mmol, 0.5 equiv),  $\text{K}_2\text{CO}_3$  (138 mg, 1 mmol, 1 equiv),  $\text{Ru}(\text{bpy})_3\text{Cl}_2 \cdot 6\text{H}_2\text{O}$  (7.4 mg, 0.01 mmol, 0.01 equiv),  $\text{CF}_3\text{I}$  (5 mmol, 5 equiv) and DMF (6 mL) were used. The reaction was conducted in a 25 mL round bottom flask. The reaction mixture was then diluted with  $\text{Et}_2\text{O}$  (40 mL), and the resulting mixture was washed with water (2 x 40 mL), saturated aqueous  $\text{CaCl}_2$  (1 x 40 mL), and brine (1 x 40 mL) and then dried over magnesium sulfate. The solvent was removed by rotary evaporation at  $0^\circ\text{C}$ , and the product was purified by Kugelrohr distillation at  $90^\circ\text{C}$  at 10 mm Hg. Compound **10a** was obtained as a 1:1 mixture with the inseparable protodeboronation product mesitylene as a clear liquid (119 mg in total, 39% yield for **10a**). The  $^1\text{H}$ ,  $^{13}\text{C}$  and  $^{19}\text{F}$  NMR spectroscopic data were identical to that reported previously in the literature.<sup>5b</sup>

Mass spectrum of product peak (11.45 min) from GCMS of Cu/Ru-catalyzed reaction between mesitylboronic acid and  $\text{CF}_3\text{I}$

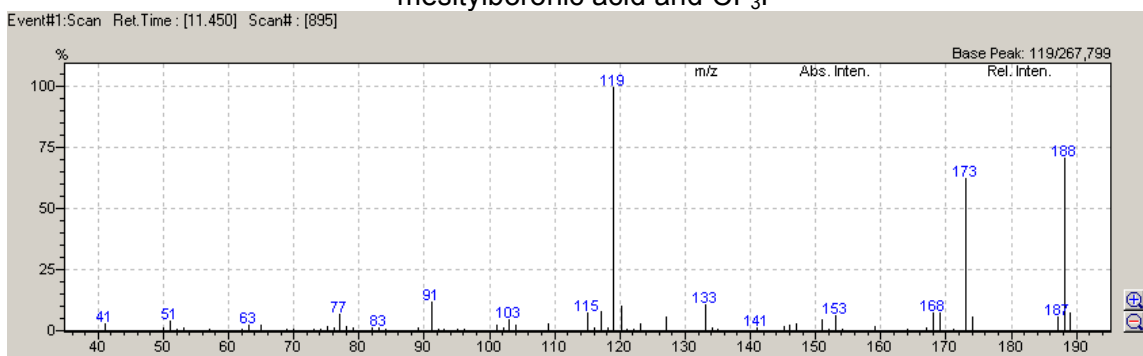

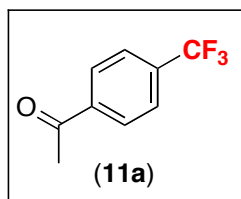

The reaction was performed on a 0.25 mmol scale using the standard procedure. The trifluoromethylated product **11a** was formed in 70% yield. The product showed a  $^{19}\text{F}$  NMR signal at  $-62.7$  ppm in DCE (lit.  $-63.0$  ppm in  $\text{CDCl}_3$ ).<sup>4</sup> The identity of the product was further confirmed by GCMS analysis, where the product peak was observed at 11.68 min.

This reaction of substrate **11** was also conducted on a 1 mmol scale. For the 1 mmol scale reaction, substrate **11** (164 mg, 1 mmol, 1 equiv), CuOAc (24 mg, 0.2 mmol, 0.2 equiv),  $\text{K}_2\text{CO}_3$  (138 mg, 1 mmol, 1 equiv),  $\text{Ru}(\text{bpy})_3\text{Cl}_2 \cdot 6\text{H}_2\text{O}$  (7.4 mg, 0.01 mmol, 0.01 equiv),  $\text{CF}_3\text{I}$  (5 mmol, 5 equiv) and DMF (6 mL) were used. The reaction was conducted in a 25 mL round bottom flask. The reaction mixture was then diluted with  $\text{Et}_2\text{O}$  (40 mL), and the resulting mixture was washed with water (2 x 40 mL), saturated aqueous  $\text{CaCl}_2$  (1 x 40 mL), and brine (1 x 40 mL) and then dried over magnesium sulfate. The solvent was removed by rotary evaporation at  $0^\circ\text{C}$ , and the product was purified by Kugelrohr distillation at  $100^\circ\text{C}$  at 10 mm Hg. The isolated product **11a** (120.0 mg, 64% yield) was 95% pure, and contained traces (5%) of the corresponding protodeboronation byproduct acetophenone, which was not easily separable by chromatography on silica gel. The  $^1\text{H}$ ,  $^{13}\text{C}$  and  $^{19}\text{F}$  NMR spectroscopic data were identical to that reported previously in the literature.<sup>4</sup>

Mass spectrum of product peak (11.68 min) from GCMS of Cu/Ru-catalyzed reaction between (4-acetylphenyl)boronic acid and  $\text{CF}_3\text{I}$

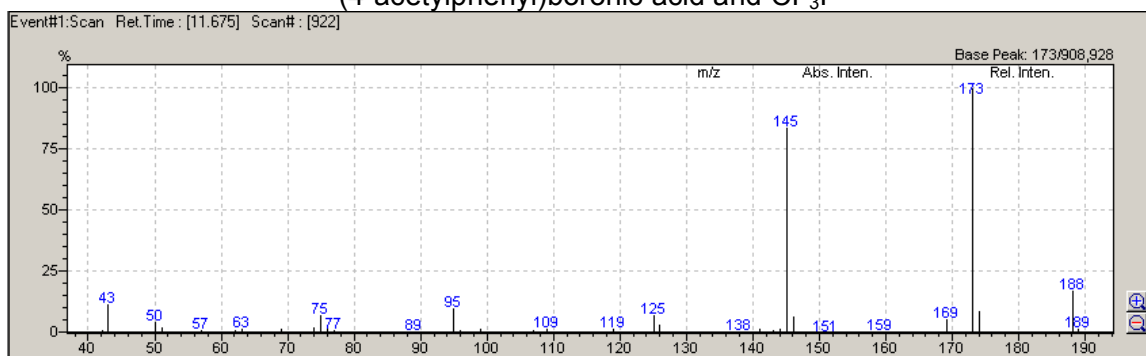

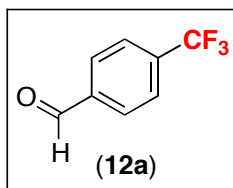

The reaction was performed on a 0.25 mmol scale using 50 mol % of CuOAc (15 mg, 0.125 mmol, 0.5 equiv) under otherwise identical conditions. The trifluoromethylated product **12a** was formed in 74% yield. The product showed a  $^{19}\text{F}$  NMR signal at  $-62.8$  ppm in DCE (lit.  $-62.7$  ppm in  $\text{CDCl}_3$ ).<sup>6</sup> The identity of the product was further confirmed by GCMS analysis, where the product peak was observed at 10.18 min.

This reaction of substrate **12** was also conducted on a 1 mmol scale. For the 1 mmol scale reaction, substrate **12** (150 mg, 1 mmol, 1 equiv), CuOAc (60 mg, 0.5 mmol, 0.5 equiv),  $\text{K}_2\text{CO}_3$  (138 mg, 1 mmol, 1 equiv),  $\text{Ru}(\text{bpy})_3\text{Cl}_2 \cdot 6\text{H}_2\text{O}$  (7.4 mg, 0.01 mmol, 0.01 equiv),  $\text{CF}_3\text{I}$  (5 mmol, 5 equiv) and DMF (6 mL) were used. The reaction was conducted in a 25 mL round bottom flask. The reaction mixture was then diluted with  $\text{Et}_2\text{O}$  (40 mL), and the resulting mixture was washed with water (2 x 40 mL), saturated aqueous  $\text{CaCl}_2$  (1 x 40 mL), and brine (1 x 40 mL) and then dried over magnesium sulfate. The solvent was removed by rotary evaporation at  $0^\circ\text{C}$ , and the product was purified by Kugelrohr distillation at  $100^\circ\text{C}$  at 10 mm Hg. The isolated product **12a** (110.0 mg, 63% yield) was 95% pure, and contained traces (5%) of the corresponding protodeboronation byproduct benzaldehyde, which was not easily separable by chromatography on silica gel. The  $^1\text{H}$ ,  $^{13}\text{C}$  and  $^{19}\text{F}$  NMR spectroscopic data were identical to that reported previously in the literature.<sup>6</sup>

Mass spectrum of product peak (10.18 min) from GCMS of Cu/Ru-catalyzed reaction between (4-formylphenyl)boronic acid and  $\text{CF}_3\text{I}$

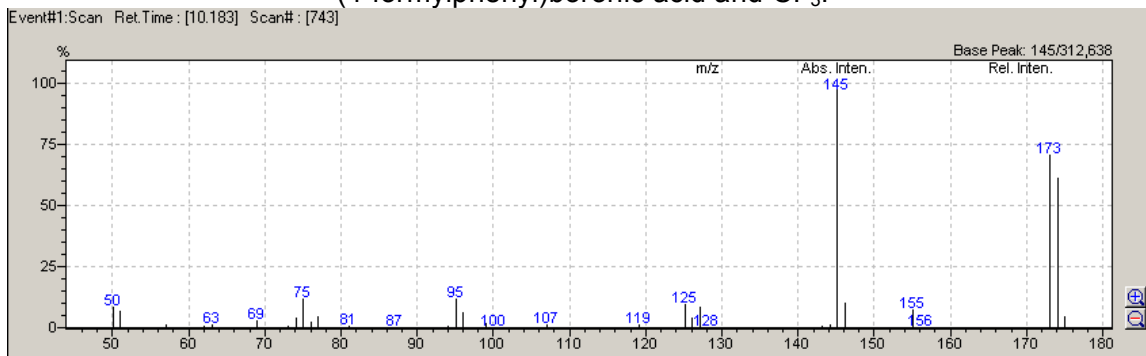

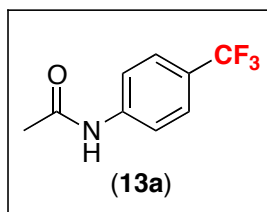

The reaction was performed on a 0.25 mmol scale using the standard procedure. The trifluoromethylated product **13a** was formed in 67% yield. The product showed a  $^{19}\text{F}$  NMR signal at  $-63.5$  ppm in DCE (lit.  $-62.3$  ppm in  $\text{CDCl}_3$ ).<sup>7</sup> The identity of the product was further confirmed by GCMS analysis, where the product peak was observed at 15.48 min.

This reaction of substrate **13** was also conducted on a 1 mmol scale. For the 1 mmol scale reaction, substrate **13** (179 mg, 1 mmol, 1 equiv),  $\text{CuOAc}$  (24 mg, 0.2 mmol, 0.2 equiv),  $\text{K}_2\text{CO}_3$  (138 mg, 1 mmol, 1 equiv),  $\text{Ru}(\text{bpy})_3\text{Cl}_2 \cdot 6\text{H}_2\text{O}$  (7.4 mg, 0.01 mmol, 0.01 equiv),  $\text{CF}_3\text{I}$  (5 mmol, 5 equiv) and DMF (6 mL) were used. The reaction was conducted in a 25 mL round bottom flask. The reaction mixture was then diluted with  $\text{Et}_2\text{O}$  (40 mL), and the resulting mixture was washed with water (2 x 40 mL), saturated aqueous  $\text{CaCl}_2$  (1 x 40 mL), and brine (1 x 40 mL) and then dried over magnesium sulfate. The solvent was removed by rotary evaporation at  $0^\circ\text{C}$ , and the product was purified by Kugelrohr distillation at  $150^\circ\text{C}$  at 10 mm Hg. The isolated product **13a** (121.0 mg, 60% yield) was 95% pure, and contained traces (5%) of the corresponding protodeboronation byproduct *N*-phenylacetamide, which was not easily separable by chromatography on silica gel. The  $^1\text{H}$ ,  $^{13}\text{C}$  and  $^{19}\text{F}$  NMR spectroscopic data were identical to that reported previously in the literature.<sup>7</sup>

Mass spectrum of product peak (15.48 min) from GCMS of Cu/Ru-catalyzed reaction between (4-acetamidophenyl)boronic acid and  $\text{CF}_3\text{I}$

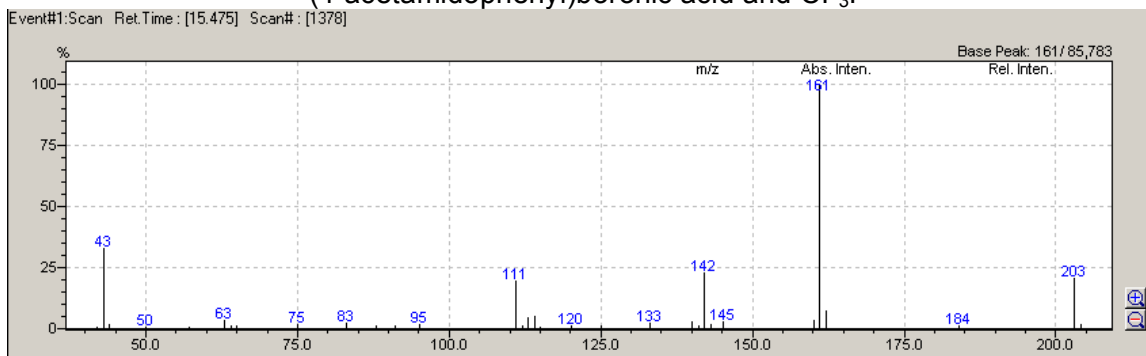

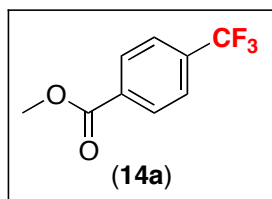

The reaction was performed on a 0.25 mmol scale using the standard procedure. The trifluoromethylated product **14a** was formed in 86% yield. The product showed a  $^{19}\text{F}$  NMR signal at  $-62.7$  ppm in DCE (lit.  $-62.9$  ppm in  $\text{CDCl}_3$ ).<sup>4</sup> The identity of the product was further confirmed by GCMS analysis, where the product peak was observed at 11.93 min.

This reaction of substrate **14** was also conducted on a 1 mmol scale. For the 1 mmol scale reaction, substrate **14** (180 mg, 1 mmol, 1 equiv),  $\text{CuOAc}$  (24 mg, 0.2 mmol, 0.2 equiv),  $\text{K}_2\text{CO}_3$  (138 mg, 1 mmol, 1 equiv),  $\text{Ru}(\text{bpy})_3\text{Cl}_2 \cdot 6\text{H}_2\text{O}$  (7.4 mg, 0.01 mmol, 0.01 equiv),  $\text{CF}_3\text{I}$  (5 mmol, 5 equiv) and DMF (6 mL) were used. The reaction was conducted in a 25 mL round bottom flask. The reaction mixture was then diluted with  $\text{Et}_2\text{O}$  (40 mL), and the resulting mixture was washed with water (2 x 40 mL), saturated aqueous  $\text{CaCl}_2$  (1 x 40 mL), and brine (1 x 40 mL) and then dried over magnesium sulfate. The solvent was removed by rotary evaporation at  $0^\circ\text{C}$ , and the product was purified by Kugelrohr distillation at  $100^\circ\text{C}$  at 10 mm Hg. The isolated product **14a** (139.0 mg, 68% yield) was 95% pure, and contained traces (5%) of the corresponding protodeboronation byproduct methyl benzoate, which was not easily separable by chromatography on silica gel. The  $^1\text{H}$ ,  $^{13}\text{C}$  and  $^{19}\text{F}$  NMR spectroscopic data were identical to that reported previously in the literature.<sup>4</sup>

Mass spectrum of product peak (11.93 min) from GCMS of Cu/Ru-catalyzed reaction between (4-(methoxycarbonyl)phenyl)boronic acid and  $\text{CF}_3\text{I}$

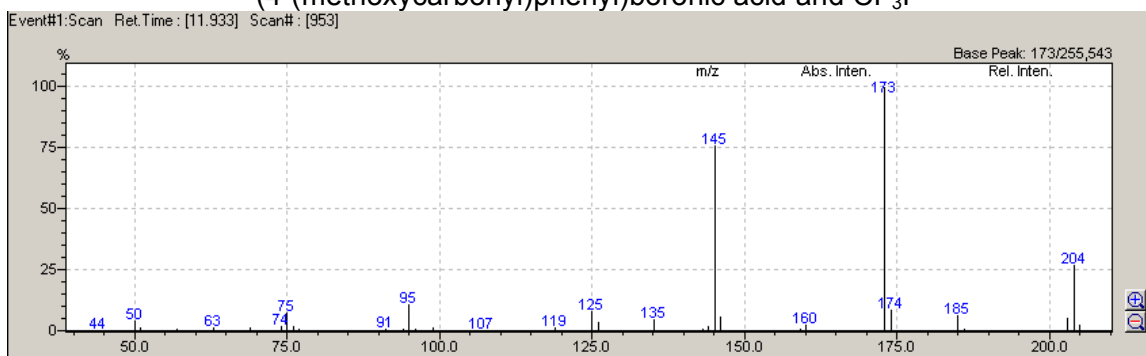

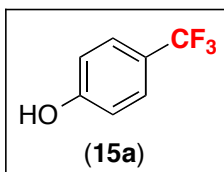

The reaction was performed on a 0.25 mmol scale using 10 mol % of CuOAc (3 mg, 0.025 mmol, 0.1 equiv) under otherwise identical conditions. The  $^{19}\text{F}$  NMR spectral data for **15a** matched that of an authentic sample (Matrix Scientific, s,  $-60.7$  ppm). The trifluoromethylated product was formed in 50% yield. The identity of the product was further confirmed by GCMS analysis, where the product peak was observed at 11.90 min.

This reaction of substrate **15** was also conducted on a 1 mmol scale. For the 1 mmol scale reaction, substrate **15** (138 mg, 1 mmol, 1 equiv), CuOAc (12 mg, 0.1 mmol, 0.1 equiv),  $\text{K}_2\text{CO}_3$  (138 mg, 1 mmol, 1 equiv),  $\text{Ru}(\text{bpy})_3\text{Cl}_2 \cdot 6\text{H}_2\text{O}$  (7.4 mg, 0.01 mmol, 0.01 equiv),  $\text{CF}_3\text{I}$  (5 mmol, 5 equiv) and DMF (6 mL) were used. The reaction was conducted in a 25 mL round bottom flask. The reaction mixture was then diluted with  $\text{Et}_2\text{O}$  (40 mL), and the resulting mixture was washed with water (2 x 40 mL), saturated aqueous  $\text{CaCl}_2$  (1 x 40 mL), and brine (1 x 40 mL) and then dried over magnesium sulfate. The solvent was removed by rotary evaporation at  $0^\circ\text{C}$ , and the product was purified by Kugelrohr distillation at  $110^\circ\text{C}$  at 10 mm Hg. Compound **15a** was obtained as a 10:1 mixture with the inseparable protodeboronation product phenol as a clear liquid (69.0 mg in total, 40% yield for **15a**). The  $^1\text{H}$ ,  $^{13}\text{C}$  and  $^{19}\text{F}$  NMR spectroscopic data were identical to the authentic sample.

Mass spectrum of product peak (11.90 min) from GCMS of Cu/Ru-catalyzed reaction between (4-hydroxyphenyl)boronic acid and  $\text{CF}_3\text{I}$

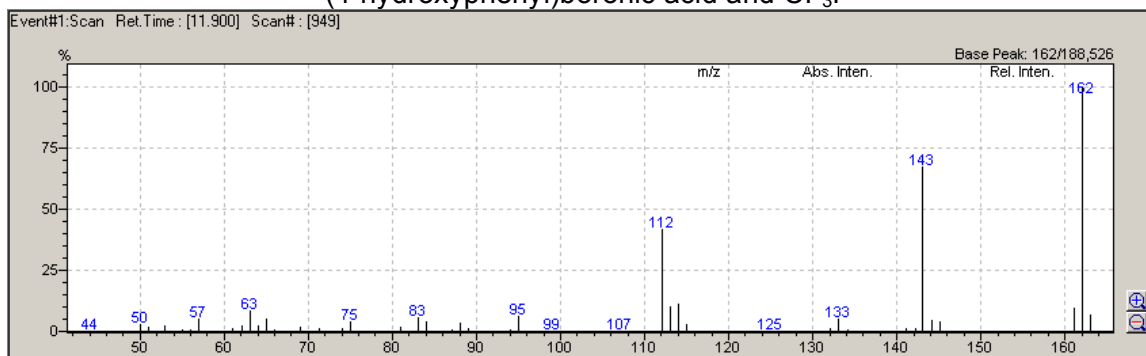

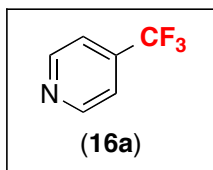

The reaction was performed on a 0.25 mmol scale using 50 mol % of CuOAc (15 mg, 0.125 mmol, 0.5 equiv) and 3 equivalent of CF<sub>3</sub>I (0.75 mmol, 3 equiv) under otherwise identical conditions. The <sup>19</sup>F NMR spectral data for **16a** matched that of an authentic sample (Matrix Scientific, s, –64.6 ppm). The trifluoromethylated product was formed in 64% yield. The identity of the product was further confirmed by GCMS analysis, where the product peak was observed at 3.94 min. The mass spectrum of the product is provided in the spectral data below.

<sup>19</sup>F NMR spectrum of crude reaction mixture for Cu/Ru-catalyzed reaction of pyridin-4-ylboronic acid with CF<sub>3</sub>I (internal standard = 1,3,5-trifluorobenzene at –107.4 ppm)

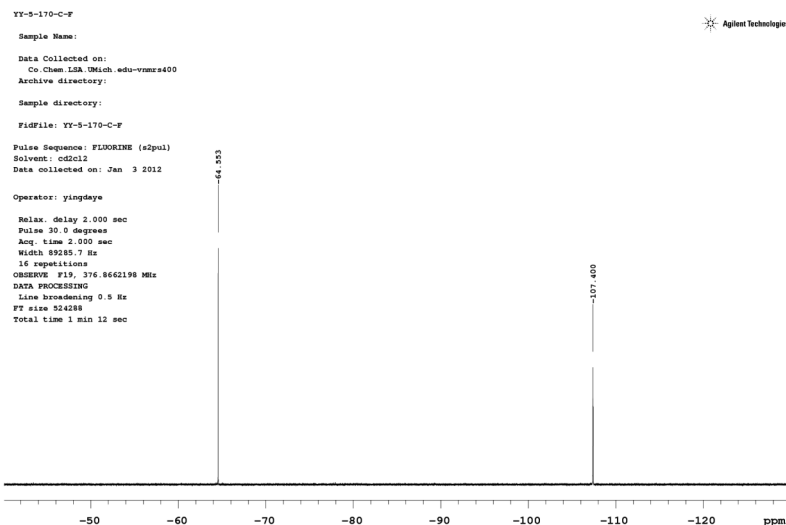

Mass spectrum of product peak (3.94 min) from GCMS of Cu/Ru-catalyzed reaction between pyridin-4-ylboronic acid and CF<sub>3</sub>I

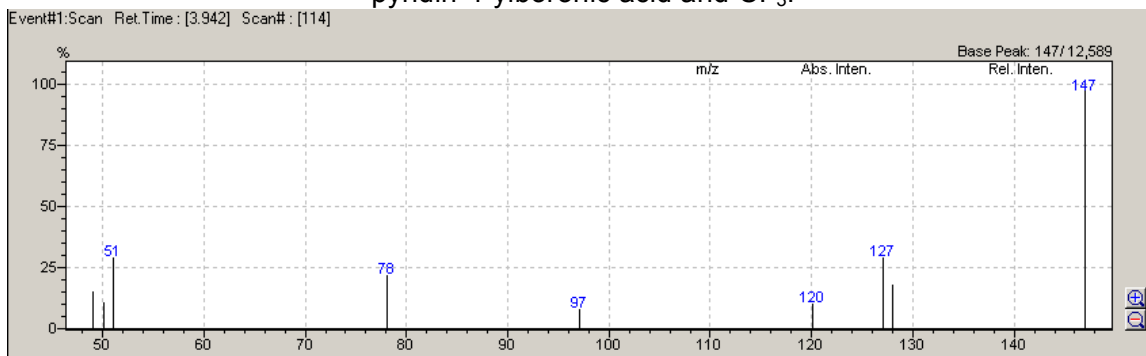

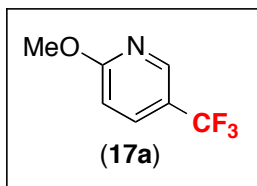

The reaction was performed on a 0.25 mmol scale using the standard procedure. The  $^{19}\text{F}$  NMR spectral data for **17a** matched that of an authentic sample (Matrix Scientific, s,  $-61.1$  ppm). The trifluoromethylated product was formed in 66% yield. The identity of the product was further confirmed by GCMS analysis, where the product peak was observed at 8.63 min. The mass spectrum of the product is provided in the spectral data below.

$^{19}\text{F}$  NMR spectrum of crude reaction mixture for Cu/Ru-catalyzed reaction of (6-methoxypyridin-3-yl)boronic acid with  $\text{CF}_3\text{I}$  (internal standard = 1,3,5-trifluorobenzene at  $-107.4$  ppm)

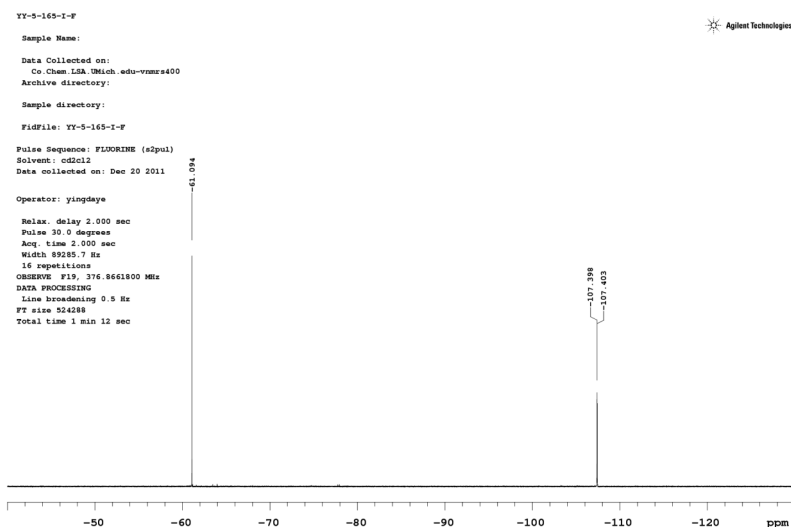

Mass spectrum of product peak (8.63 min) from GCMS of Cu/Ru-catalyzed reaction between (6-methoxypyridin-3-yl)boronic acid and  $\text{CF}_3\text{I}$

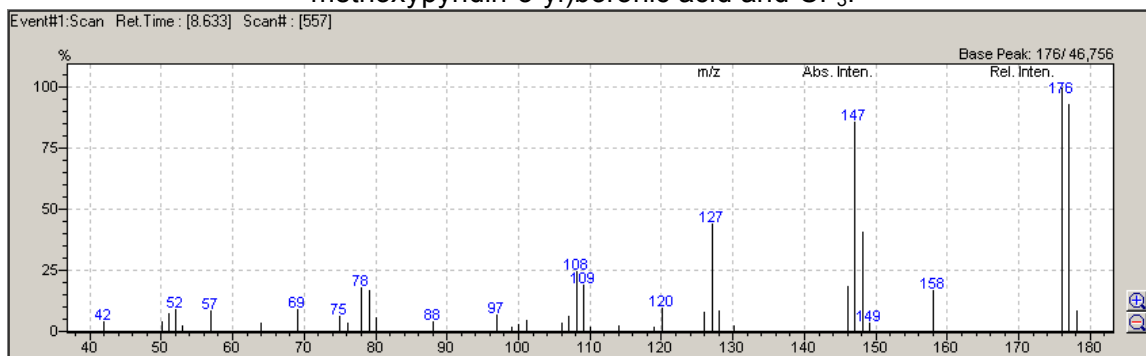

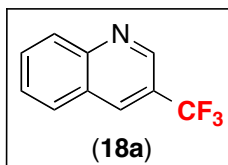

The reaction was performed on a 0.25 mmol scale using the standard procedure. The trifluoromethylated product **18a** was formed in 70% yield. The product showed a  $^{19}\text{F}$  NMR signal at  $-61.4$  ppm in DCE (lit.  $-61.4$  ppm in  $\text{CDCl}_3$ ).<sup>6</sup> The identity of the product was further confirmed by GCMS analysis, where the product peak was observed at 13.28 min. The mass spectrum of the product is provided in the spectral data below.

This reaction of substrate **18** was also conducted on a 1 mmol scale. For the 1 mmol scale reaction, substrate **18** (173 mg, 1 mmol, 1 equiv),  $\text{CuOAc}$  (24 mg, 0.2 mmol, 0.2 equiv),  $\text{K}_2\text{CO}_3$  (138 mg, 1 mmol, 1 equiv),  $\text{Ru}(\text{bpy})_3\text{Cl}_2 \cdot 6\text{H}_2\text{O}$  (7.4 mg, 0.01 mmol, 0.01 equiv),  $\text{CF}_3\text{I}$  (5 mmol, 5 equiv) and DMF (6 mL) were used. The reaction was conducted in a 25 mL round bottom flask. The reaction mixture was then diluted with  $\text{Et}_2\text{O}$  (40 mL), and the resulting mixture was washed with water (2 x 40 mL), saturated aqueous  $\text{CaCl}_2$  (1 x 40 mL), and brine (1 x 40 mL) and then dried over magnesium sulfate. The solvent was removed by rotary evaporation at  $0^\circ\text{C}$ , and the product was purified by Kugelrohr distillation at  $130^\circ\text{C}$  at 10 mm Hg. The isolated product **18a** (132.0 mg, 67% yield) was 96% pure, and contained traces (4%) of the corresponding protodeboronation byproduct quinoline. Subsequent purification of this sample by column chromatography on silica gel using 2% diethyl ether in pentane as the eluent afforded **18a** as a white solid (108 mg, 55% yield). The  $^1\text{H}$ ,  $^{13}\text{C}$  and  $^{19}\text{F}$  NMR spectroscopic data were identical to that reported previously in the literature.<sup>6</sup>

Mass spectrum of product peak (13.28 min) from GCMS of Cu/Ru-catalyzed reaction between quinolin-3-ylboronic acid and  $\text{CF}_3\text{I}$

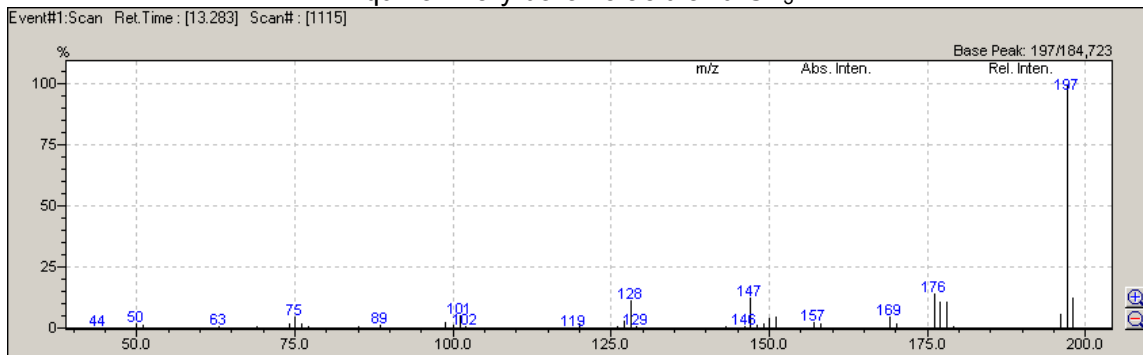

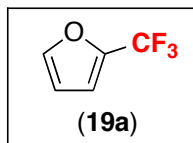

The reaction was performed on a 0.25 mmol scale using 50 mol % of CuOAc (15 mg, 0.125 mmol, 0.5 equiv) at 70 °C under otherwise identical conditions. The trifluoromethylated product **19a** was formed in 44% yield. The product showed a  $^{19}\text{F}$  NMR signal at  $-63.6$  ppm in DCE (lit.  $-64.8$  ppm in  $\text{CD}_3\text{CN}$ ).<sup>8</sup> The identity of the product was further confirmed by GCMS analysis. The GC oven temperature program was as follows: 30 °C hold 6 min, ramp 20 °C/min to 250 °C, and hold for 3 min. The product peak was observed at 2.08 min. The mass spectrum of the product is provided in the spectral data below.

$^{19}\text{F}$  NMR spectrum of crude reaction mixture for Cu/Ru-catalyzed reaction of furan-2-ylboronic acid with  $\text{CF}_3\text{I}$  (internal standard = 1,3,5-trifluorobenzene at  $-107.4$  ppm)

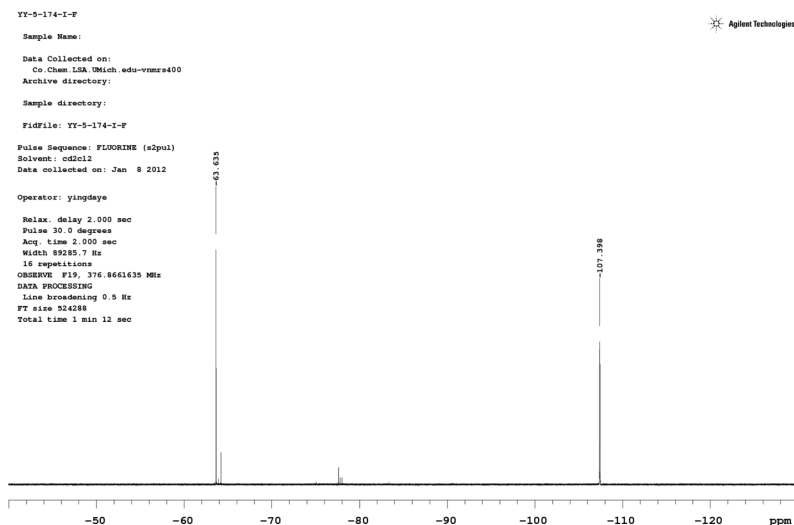

Mass spectrum of product peak (2.08 min) from GCMS of Cu/Ru-catalyzed reaction between furan-2-ylboronic acid and  $\text{CF}_3\text{I}$

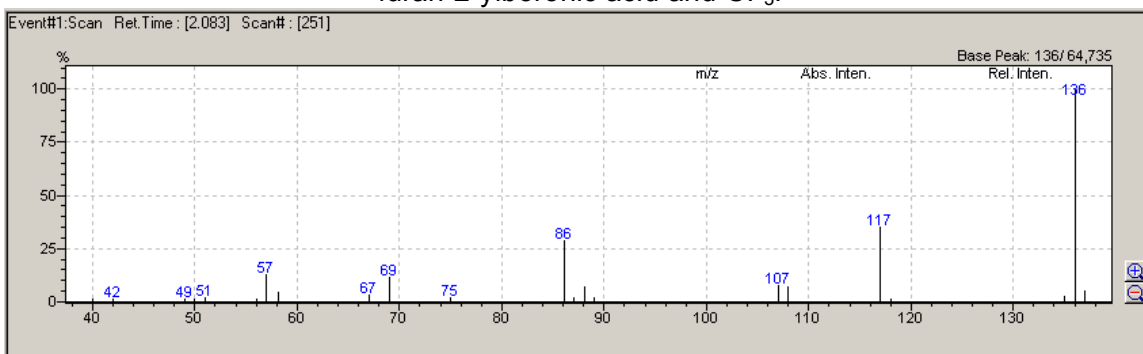

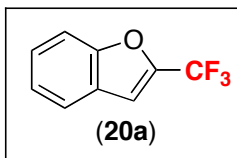

The reaction was performed on a 0.25 mmol scale using 10 mol % of CuOAc (3 mg, 0.025 mmol, 0.1 equiv) at 40 °C under otherwise identical conditions. The trifluoromethylated product **20a** was formed in 72% yield. The product showed a  $^{19}\text{F}$  NMR signal at  $-64.4$  ppm in DCE (lit.  $-64.8$  ppm in  $\text{CDCl}_3$ ).<sup>4</sup> The identity of the product was further confirmed by GCMS analysis, where the product peak was observed at 10.52 min. The mass spectrum of the product is provided in the spectral data below.

This reaction of substrate **20** was also conducted on a 1 mmol scale. For the 1 mmol scale reaction, substrate **20** (162 mg, 1 mmol, 1 equiv), CuOAc (12 mg, 0.1 mmol, 0.1 equiv),  $\text{K}_2\text{CO}_3$  (138 mg, 1 mmol, 1 equiv),  $\text{Ru}(\text{bpy})_3\text{Cl}_2 \cdot 6\text{H}_2\text{O}$  (7.4 mg, 0.01 mmol, 0.01 equiv),  $\text{CF}_3\text{I}$  (5 mmol, 5 equiv) and DMF (6 mL) were used. The reaction was conducted in a 100 mL round bottom flask. The reaction mixture was then diluted with  $\text{Et}_2\text{O}$  (40 mL), and the resulting mixture was washed with water (2 x 40 mL), saturated aqueous  $\text{CaCl}_2$  (1 x 40 mL), and brine (1 x 40 mL) and then dried over magnesium sulfate. The solvent was removed by rotary evaporation at 0 °C, and the product was purified by column chromatography on aluminum oxide using pentane as the eluent. Compound **20a** was isolated as a clear liquid (104.0 mg, 56% yield). The  $^1\text{H}$ ,  $^{13}\text{C}$  and  $^{19}\text{F}$  NMR spectroscopic data were identical to that reported previously in the literature.<sup>4</sup>

Mass spectrum of product peak (10.52 min) from GCMS of Cu/Ru-catalyzed reaction between benzofuran-2-ylboronic acid and  $\text{CF}_3\text{I}$

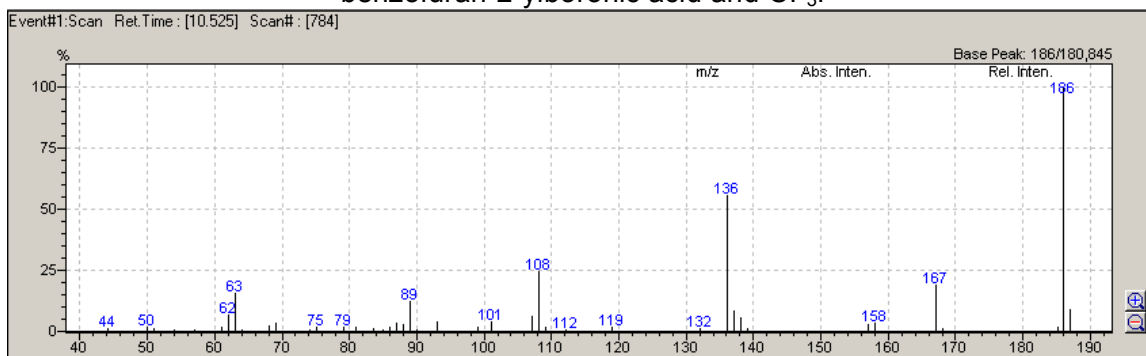

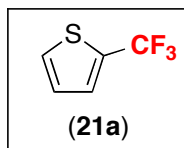

The reaction was performed on a 0.25 mmol scale using 5 mol % of CuOAc (1.5 mg, 0.0125 mmol, 0.05 equiv) under otherwise identical conditions. The trifluoromethylated product **21a** was formed in 54% yield. The product showed a  $^{19}\text{F}$  NMR signal at  $-54.5$  ppm in DCE (lit.  $-55.1$  ppm in  $\text{CDCl}_3$ ).<sup>9</sup> The identity of the product was further confirmed by GCMS analysis, where the product peak was observed at 3.43 min. The mass spectrum of the product is provided in the spectral data below.

$^{19}\text{F}$  NMR spectrum of crude reaction mixture for Cu/Ru-catalyzed reaction of thiophen-2-ylboronic acid with  $\text{CF}_3\text{I}$  (internal standard = 1,3,5-trifluorobenzene at  $-107.4$  ppm)

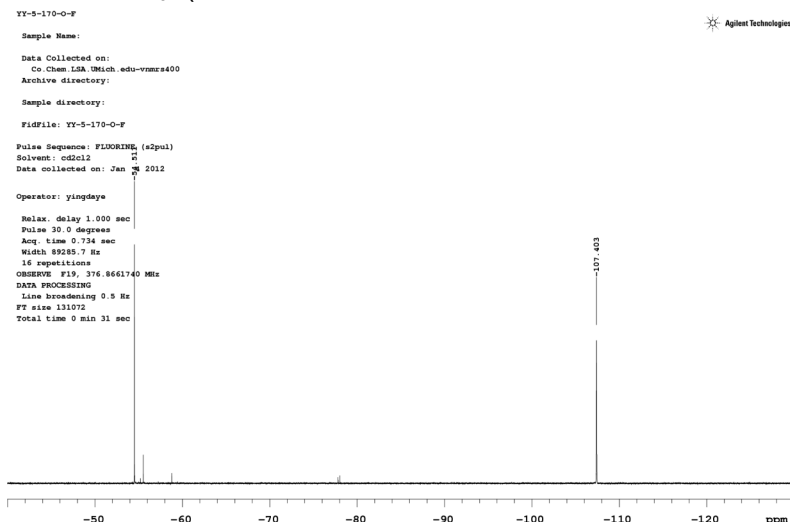

Mass spectrum of product peak (3.43 min) from GCMS of Cu/Ru-catalyzed reaction between thiophen-2-ylboronic acid and  $\text{CF}_3\text{I}$

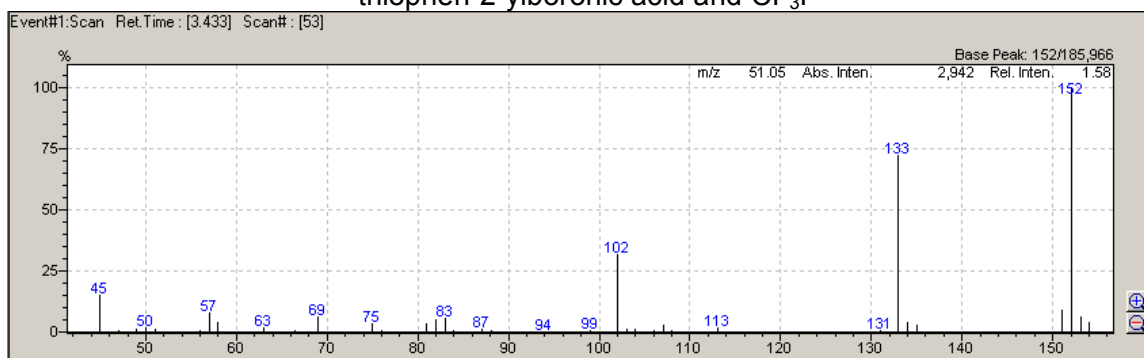

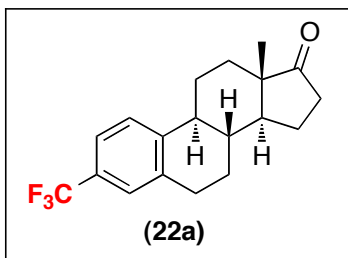

Estrone boronic acid was prepared according to literature procedure.<sup>10,11</sup> The reaction was performed on a 0.25 mmol scale using 50 mol % of CuOAc (6 mg, 0.125 mmol, 0.5 equiv) under otherwise identical conditions. The trifluoromethylated product **22a** was formed in 87% yield by <sup>19</sup>F NMR spectroscopy. The reaction mixture was then diluted with ethyl acetate (20 mL), and the resulting mixture was washed with brine (3 x 30 mL) and then dried over magnesium sulfate. The solvent was removed by rotary evaporation, and the product was purified by column chromatography on silica gel using ethyl acetate/hexane 1:9 as the eluent. Compound **22a** was obtained as white crystalline solid (65.0 mg, 80% yield, mp = 146.4-147.8 °C). <sup>1</sup>H NMR (CDCl<sub>3</sub>, 25 °C): δ 7.40-7.38 (m, 2H), 7.36-7.33 (m, 1H), 2.98-2.93 (m, 2H), 2.52 (dd, *J* = 19.1, 9.0 Hz, 1H), 2.47-2.42 (m, 1H), 2.37-2.30 (m, 1H), 2.20-1.96 (m, 4H), 1.70-1.44 (m, 6H), 0.92 (s, 3H). <sup>13</sup>C NMR (<sup>1</sup>H decoupled, CDCl<sub>3</sub>, 25 °C): δ 220.59, 143.86, 137.39, 128.24 (q, *J* = 31.8 Hz), 125.92, 125.86 (q, *J* = 4.1 Hz), 124.48 (q, *J* = 272.3 Hz), 122.59 (q, *J* = 3.6 Hz), 50.63, 48.02, 44.58, 37.96, 35.95, 31.66, 29.43, 26.34, 25.76, 21.72, 13.94. <sup>19</sup>F NMR (CDCl<sub>3</sub>, 25 °C): δ -62.46 (s, 3F). HRMS EI (*m/z*): [*M*]<sup>+</sup> calcd for C<sub>19</sub>H<sub>21</sub>F<sub>3</sub>O, 322.1545; measured, 322.1542.

### Possible Mechanism for Cu/Ru-Catalyzed Trifluoromethylation with Redox Values

Although the redox values of the Cu and Ru species under our exact reaction conditions are not available, the proposed mechanism is consistent with the redox values reported in the literature.

**Figure S1.** Redox potentials for proposed catalytic intermediates

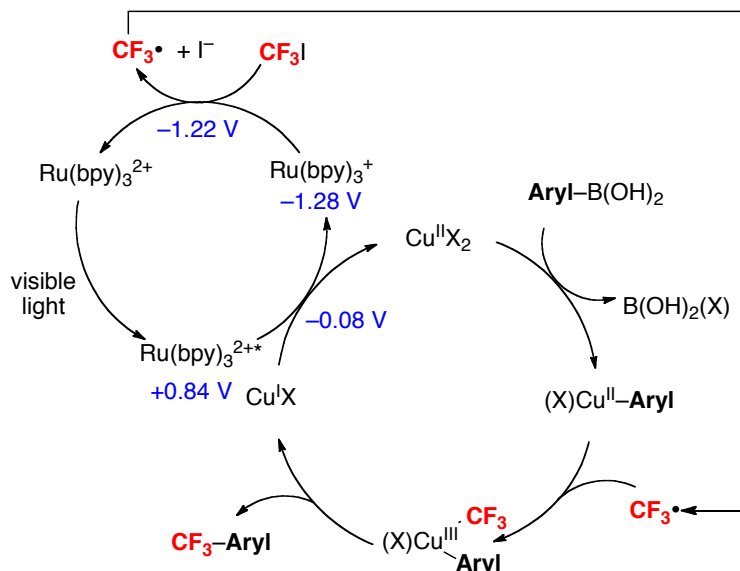

Reported potentials of Ru and Cu are in aqueous solution vs SCE.<sup>12,13</sup>

Reported potential of CF<sub>3</sub>I is in DMF vs SCE.<sup>14</sup>

### Control Reactions of Trifluoromethylation of Aryl Boronic Acids<sup>[a]</sup>

The control reactions were performed on 0.05 mmol scale under otherwise identical conditions.

| Entry           | Product                                                                                      | Yield | Without<br>Cu cat | Without<br>Ru cat | Without<br>light |
|-----------------|----------------------------------------------------------------------------------------------|-------|-------------------|-------------------|------------------|
| 1               | 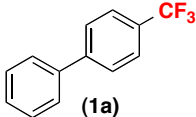<br>(1a)    | 80%   | 3%                | 3%                | 1%               |
| 2               | 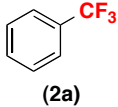<br>(2a)    | 70%   | 5%                | 0%                | 0%               |
| 3               | 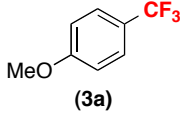<br>(3a)    | 84%   | 5%                | 1%                | 0%               |
| 4               | 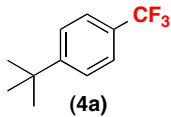<br>(4a)    | 86%   | 2%                | 1%                | 3%               |
| 5 <sup>b</sup>  | 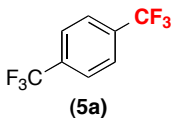<br>(5a)    | 64%   | 2%                | 11%               | 2%               |
| 6               | 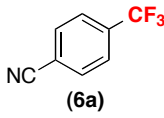<br>(6a)   | 84%   | 1%                | 22%               | 2%               |
| 7               | 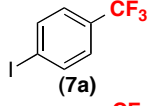<br>(7a)  | 73%   | 2%                | 13%               | 8%               |
| 8               | 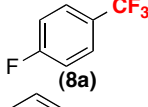<br>(8a)  | 93%   | 1%                | 20%               | 4%               |
| 9               | 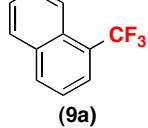<br>(9a)  | 57%   | 6%                | 2%                | 0%               |
| 10 <sup>b</sup> | 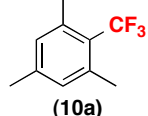<br>(10a) | 45%   | 4%                | 4%                | 0%               |
| 11              | 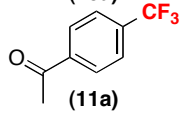<br>(11a) | 70%   | 4%                | 14%               | 0%               |
| 12 <sup>b</sup> | 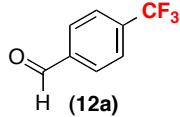<br>(12a) | 74%   | 4%                | 5%                | 2%               |

| Entry             | Product                                                                                      | Yield | Without Cu cat | Without Ru cat | Without light |
|-------------------|----------------------------------------------------------------------------------------------|-------|----------------|----------------|---------------|
| 13                | 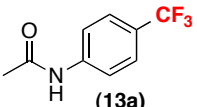<br>(13a)   | 67%   | 4%             | 5%             | 1%            |
| 14                | 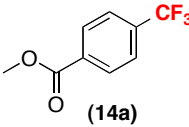<br>(14a)   | 86%   | 4%             | 15%            | 2%            |
| 15 <sup>c</sup>   | 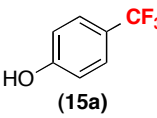<br>(15a)   | 50%   | 3%             | 1%             | 0%            |
| 16 <sup>b,d</sup> | 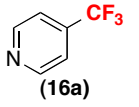<br>(16a)   | 64%   | 2%             | 21%            | 3%            |
| 17                | 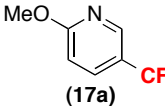<br>(17a)   | 66%   | 2%             | 10%            | 1%            |
| 18                | 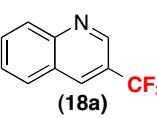<br>(18a)   | 70%   | 5%             | 34%            | 13%           |
| 19 <sup>c,e</sup> | 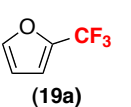<br>(19a)  | 48%   | 7%             | 2%             | 0%            |
| 20 <sup>c,f</sup> | 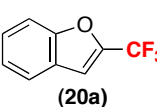<br>(20a) | 72%   | 23%            | 15%            | 1%            |
| 21 <sup>g</sup>   | 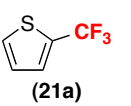<br>(21a) | 54%   | 17%            | 7%             | 0%            |
| 22 <sup>b</sup>   | 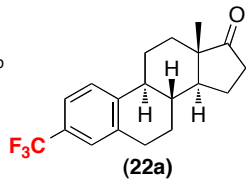<br>(22a) | 87%   | 0%             | 29%            | 1%            |

[<sup>a</sup>] General conditions: substrate (0.05 mmol, 1 equiv), CF<sub>3</sub>I (5 equiv), [Cu] (0.2 equiv), Ru(bpy)<sub>3</sub>Cl<sub>2</sub>•6H<sub>2</sub>O (0.01 equiv), K<sub>2</sub>CO<sub>3</sub> (1 equiv), DMF (0.17 M in substrate), 60 °C, 12 h, 26 W compact fluorescent light bulb. <sup>19</sup>F NMR yield. [<sup>b</sup>] 0.5 equiv of CuOAc. [<sup>c</sup>] 0.1 equiv of CuOAc. [<sup>d</sup>] 3 equiv of CF<sub>3</sub>I. [<sup>e</sup>] Reaction run at 70 °C. [<sup>f</sup>] Reaction run at 40 °C. [<sup>g</sup>] 0.05 equiv of CuOAc.

### Perfluoroalkylation of Aryl Boronic Acids

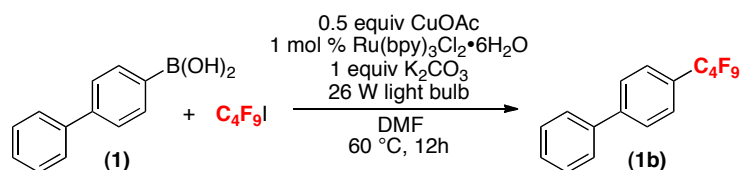

In a glovebox, substrate **1** (49.5 mg, 0.25 mmol, 1 equiv), CuOAc (15.3 mg, 0.125 mmol, 0.5 equiv),  $\text{Ru}(\text{bpy})_3\text{Cl}_2 \cdot 6\text{H}_2\text{O}$  (1.85 mg, 0.0025 mmol, 0.01 equiv) and  $\text{K}_2\text{CO}_3$  (35 mg, 0.25 mmol, 1 equiv) were weighed into a 20 mL vial. DMF (1.5 mL) and then  $\text{C}_4\text{F}_9\text{I}$  (215  $\mu\text{L}$ , 1.25 mmol, 5 equiv) were added. The vial was sealed with a Teflon-lined cap, removed from the glove box and placed in a clear oil bath at 60 °C with two 26 W compact fluorescent light bulbs (one on either side of the vial about 5 cm away). The reaction mixture was allowed to stir for 12 h. The resulting red reaction mixture was cooled to room temperature and diluted with  $\text{CH}_2\text{Cl}_2$  (2 mL). 1,3,5-Trifluorobenzene (0.25 mmol, 1 equiv) was added as an internal standard, and the yield was determined to be 82% by  $^{19}\text{F}$  NMR spectroscopy. The reaction mixture was then diluted with  $\text{Et}_2\text{O}$  (20 mL), and the resulting mixture was washed with water (3 x 20 mL) and brine (1 x 20 mL) and then dried over magnesium sulfate. The solvent was removed by rotary evaporation, and the product was purified by column chromatography on silica gel using hexane as the eluent. Compound **1b** was obtained as white crystalline solid (62.0 mg, 67% yield, mp = 50.8-51.6 °C).  $^1\text{H}$  NMR ( $\text{CDCl}_3$ , 25 °C):  $\delta$  7.72 (d,  $J$  = 8.0 Hz, 2H), 7.66 (d,  $J$  = 8.0 Hz, 2H), 7.62 (d,  $J$  = 8.0 Hz, 2H), 7.49 (t,  $J$  = 8.0 Hz, 2H), 7.42 (t,  $J$  = 8.0 Hz, 1H).  $^{13}\text{C}$  NMR ( $^1\text{H}$  decoupled,  $\text{CDCl}_3$ , 25 °C):  $\delta$  145.07, 139.79, 129.15, 128.41, 127.70 (t,  $J$  = 24.7 Hz), 127.47 (2 carbons), 127.45, 127.40, 118-109 (multiple peaks, perfluoroalkyl chain).  $^{13}\text{C}$  NMR ( $^{19}\text{F}$  decoupled,  $\text{CDCl}_3$ , 25 °C):  $\delta$  145.07 (m), 139.79 (m), 129.15 (dd,  $J$  = 161.8, 7.6 Hz), 128.42 (dt,  $J$  = 160.8, 7.8 Hz), 127.72 (t,  $J$  = 7.8 Hz), 128-126 (multiple overlapping peaks), 117.67, 116.06 (m), 110.51, 109.15.  $^{19}\text{F}$  NMR ( $\text{CDCl}_3$ , 25 °C):  $\delta$  -81.03 (t,  $J$  = 9.4 Hz, 3F), -110.82 (t,  $J$  = 13.2 Hz, 2F), -122.70 (m, 2F), -125.57 (m, 2F). HRMS EI ( $m/z$ ):  $[\text{M}]^+$  calcd for  $\text{C}_{16}\text{H}_9\text{F}_9$ , 372.0561; measured, 372.0551.

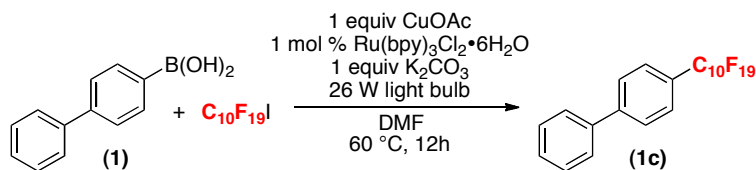

In a glovebox, substrate **1** (49.5 mg, 0.25 mmol, 1 equiv), CuOAc (30.6 mg, 0.25 mmol, 1 equiv), Ru(bpy)<sub>3</sub>Cl<sub>2</sub>·6H<sub>2</sub>O (1.85 mg, 0.0025 mmol, 0.01 equiv) and K<sub>2</sub>CO<sub>3</sub> (35 mg, 0.25 mmol, 1 equiv) and C<sub>10</sub>F<sub>21</sub>I (193.8 mg, 0.3 mmol, 1.2 equiv) were weighed into a 20 mL vial. DMF (1.5 mL) was added. The vial was sealed with a Teflon-lined cap, removed from the glove box, and placed in a clear oil bath at 60 °C with two 26 W compact fluorescent light bulbs (one on either side of the vial about 5 cm away). The reaction mixture was allowed to stir for 12 h. The resulting red reaction mixture was cooled to room temperature and diluted with CH<sub>2</sub>Cl<sub>2</sub> (2 mL). 1,3,5-Trifluorobenzene (0.25 mmol, 1 equiv) was added as an internal standard, and the yield was determined to be 80% by <sup>19</sup>F NMR spectroscopy. The reaction mixture was then diluted with Et<sub>2</sub>O (20 mL), and the resulting mixture was washed with water (3 x 20 mL) and brine (1 x 20 mL) and then dried over magnesium sulfate. The solvent was removed by rotary evaporation, and the product was purified by column chromatography on silica gel using hexane as the eluent. Compound **1c** was obtained as white crystalline solid (119.0 mg, 71% yield, mp = 91.4-94.8 °C). <sup>1</sup>H NMR (CDCl<sub>3</sub>, 25 °C): δ 7.72 (d, *J* = 8.0 Hz, 2H), 7.66 (d, *J* = 8.0 Hz, 2H), 7.62 (d, *J* = 7.5 Hz, 2H), 7.48 (t, *J* = 8.0 Hz, 2H), 7.42 (t, *J* = 7.5 Hz, 1H). <sup>13</sup>C NMR (<sup>1</sup>H decoupled, CDCl<sub>3</sub>, 25 °C): δ 145.08, 139.82, 129.15, 128.41, 127.87 (t, *J* = 24.8 Hz), 127.52, 127.46 (2 carbons), 127.42, 118-108 (multiple peaks, perfluoroalkyl chain). <sup>13</sup>C NMR (<sup>19</sup>F decoupled, CDCl<sub>3</sub>, 25 °C): δ 145.08 (m), 139.82 (m), 129.15 (dd, *J* = 161.8, 7.8 Hz), 128.41 (dt, *J* = 160.8, 7.3 Hz), 127.86 (t, *J* = 7.9 Hz), 128-126 (multiple overlapping peaks), 117.29, 116.21, 111.57, 111.08, 111.04, 110.96, 110.86, 110.34, 108.55. <sup>19</sup>F NMR (CDCl<sub>3</sub>, 25 °C): δ -80.88 (t, *J* = 9.4 Hz, 3F), -110.61 (t, *J* = 14.1 Hz, 2F), -121.25 (m, 2F), -121.80 (m, 8F), -121.96 (m, 2F), -122.76 (m, 2F), -126.19 (m, 2F). HRMS EI (*m/z*): [*M*]<sup>+</sup> calcd for C<sub>22</sub>H<sub>9</sub>F<sub>21</sub>, 672.0369; found, 672.0361.

## NMR Spectra of New Compounds

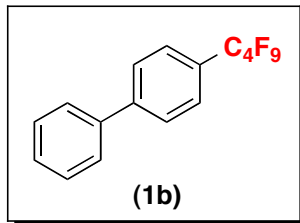

$^1\text{H}$  NMR

YY-PhPhC4F9-H

Sample Name:

Data Collected on:

Ga Chem. LSA. Umich. edu-vnmrs400

Archive directory:

Sample directory:

FidFile: YY-PhPhC4F9-H

Pulse Sequence: PROTON (s2pul)

Solvent: cdcl3

Data collected on: Feb 9 2012

Operator: yingdaye

Relax. delay 0.500 sec

Pulse 45.0 degrees

Acq. time 3.500 sec

Width 6410.3 Hz

16 repetitions

OBSERVE H1, 399.5337063 MHz

DATA PROCESSING

Line broadening 0.3 Hz

FT size 65536

Total time 1 min 12 sec

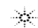 Agilent Technologies

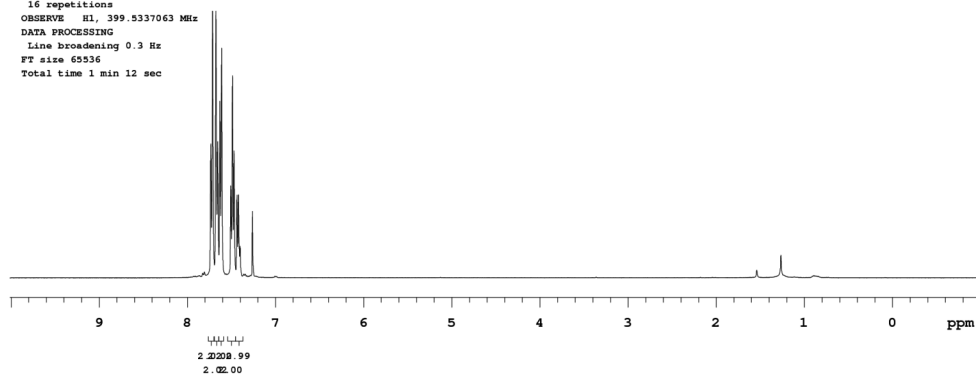

YY-PhPhC4F9-H

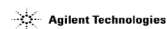

Sample Name:

Data Collected on:

Ga.Chem.LSA.UMich.edu-vnmrs400

Archive directory:

Sample directory:

FidFile: YY-PhPhC4F9-H

Pulse Sequence: PROTON (s2pul)

Solvent: cdcl3

Data collected on: Feb 9 2012

Operator: yingdaye

Relax. delay 0.500 sec

Pulse 45.0 degrees

Acq. time 3.500 sec

Width 6410.3 Hz

16 repetitions

OBSERVE H1, 399.5337063 MHz

DATA PROCESSING

Line broadening 0.3 Hz

FT size 65536

Total time 1 min 12 sec

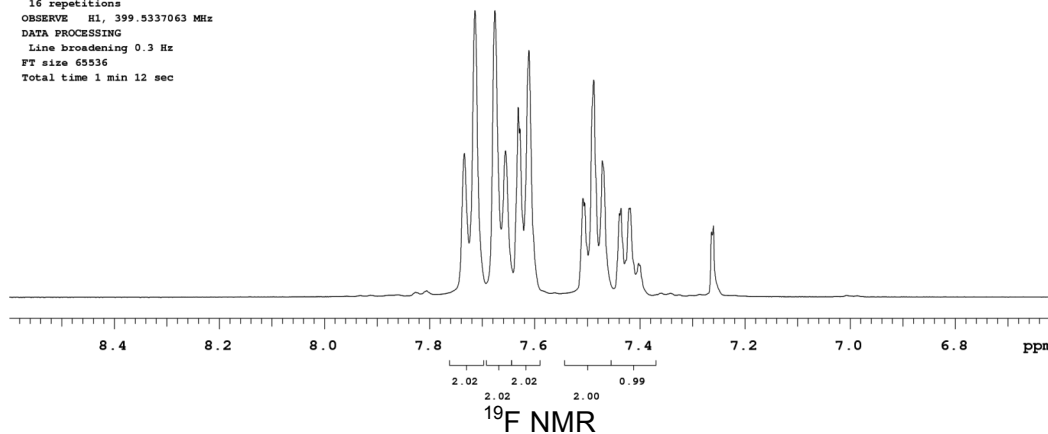

YY-5-167-F

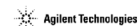

Sample Name:

Data Collected on:

Te-vnmrs500

Archive directory:

Sample directory:

FidFile: YY-5-167-F

Pulse Sequence: FLUORINE (s2pul)

Solvent: cdcl3

Data collected on: Jan 13 2012

Operator: yingdaye

Relax. delay 2.000 sec

Pulse 30.0 degrees

Acq. time 2.000 sec

Width 108.7 kHz

16 repetitions

OBSERVE F19, 470.5577223 MHz

DATA PROCESSING

Line broadening 1.5 Hz

FT size 524288

Total time 1 min 12 sec

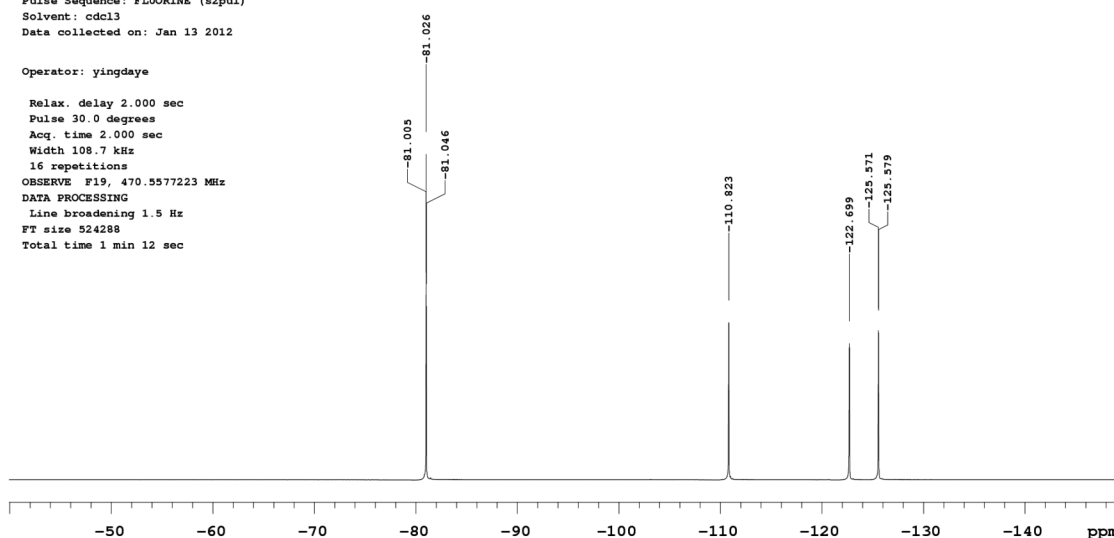

$^{13}\text{C}$  NMR ( $^1\text{H}$  decoupled,  $\text{CDCl}_3$ , 25 °C):

YY-5-167-C

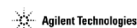

Sample Name:

Data Collected on:

Te-vnmrs500

Archive directory:

Sample directory:

FidFile: YY-5-167-C

Pulse Sequence: CARBON (s2pul)

Solvent:  $\text{cdcl}_3$

Data collected on: Jan 13 2012

Operator: yingdaye

Relax. delay 0.100 sec

Pulse 45.0 degrees

Acq. time 1.022 sec

Width 32051.3 Hz

6848 repetitions

OBSERVE C13, 125.7485070 MHz

DECOUPLE H1, 500.0956704 MHz

Power 42 dB

continuously on

WALTZ-16 modulated

DATA PROCESSING

Line broadening 1.0 Hz

FT size 65536

Total time 2 hr, 8 min

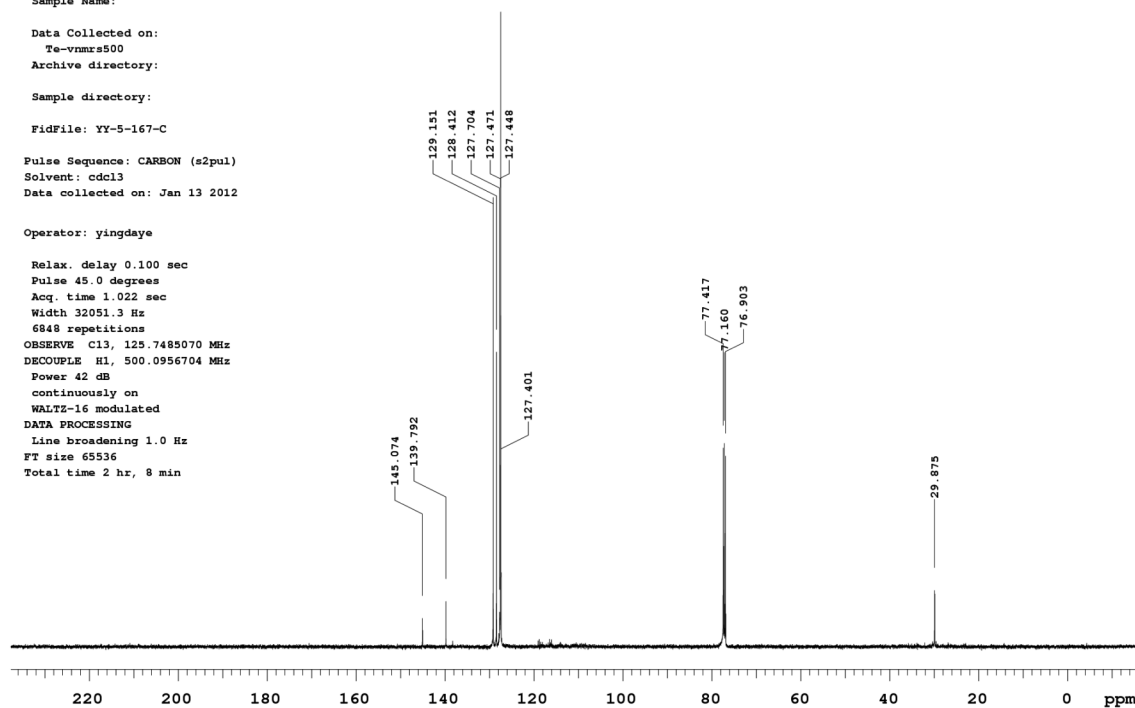

YY-5-167-C

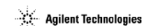

Sample Name:

Data Collected on:

Te-vnmrs500

Archive directory:

Sample directory:

FidFile: YY-5-167-C

Pulse Sequence: CARBON (s2pul)

Solvent:  $\text{cdcl}_3$

Data collected on: Jan 13 2012

Operator: yingdaye

Relax. delay 0.100 sec

Pulse 45.0 degrees

Acq. time 1.022 sec

Width 32051.3 Hz

6848 repetitions

OBSERVE C13, 125.7485070 MHz

DECOUPLE H1, 500.0956704 MHz

Power 42 dB

continuously on

WALTZ-16 modulated

DATA PROCESSING

Line broadening 1.0 Hz

FT size 65536

Total time 2 hr, 8 min

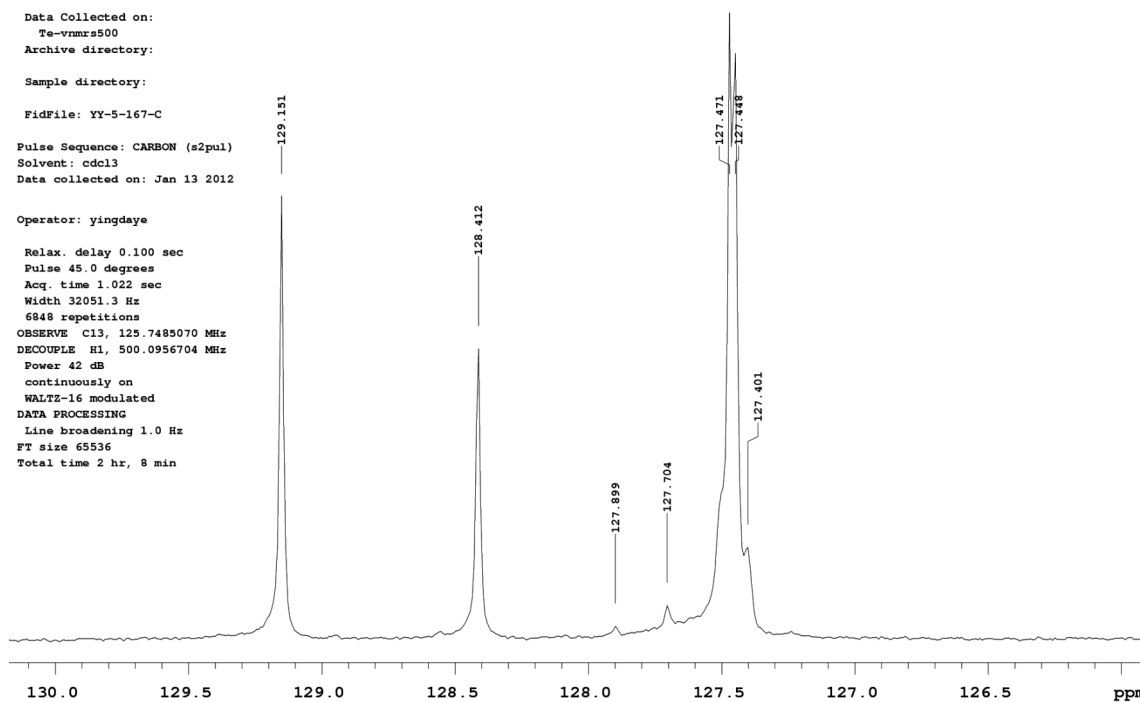

$^{13}\text{C}$  NMR ( $^{19}\text{F}$  decoupled,  $\text{CDCl}_3$ , 25 °C):

YY-5-167-C-F-decoupled

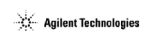

Sample Name:

Data Collected on:

Te-vnmrs500

Archive directory:

Sample directory:

FidFile: YY-5-167-C-F-decoupled

Pulse Sequence: CARBON (s2pul)

Solvent:  $\text{cdcl}_3$

Data collected on: Jan 13 2012

Temp. 25.0 C / 298.1 K

Operator: yingdaye

Relax. delay 2.000 sec

Pulse 45.0 degrees

Acq. time 1.022 sec

Width 32051.3 Hz

1920 repetitions

OBSERVE  $\text{Cl}_3$ , 125.7485060 MHz

DECOUPLE  $\text{F}_{19}$ , 470.5021965 MHz

Power 44 dB

continuously on

$\text{F}_{19}\text{dec\_WURST40\_40\_kHz\_duty\_1.00}$  modulated

DATA PROCESSING

Line broadening 1.0 Hz

FT size 65536

Total time 1 hr, 36 min

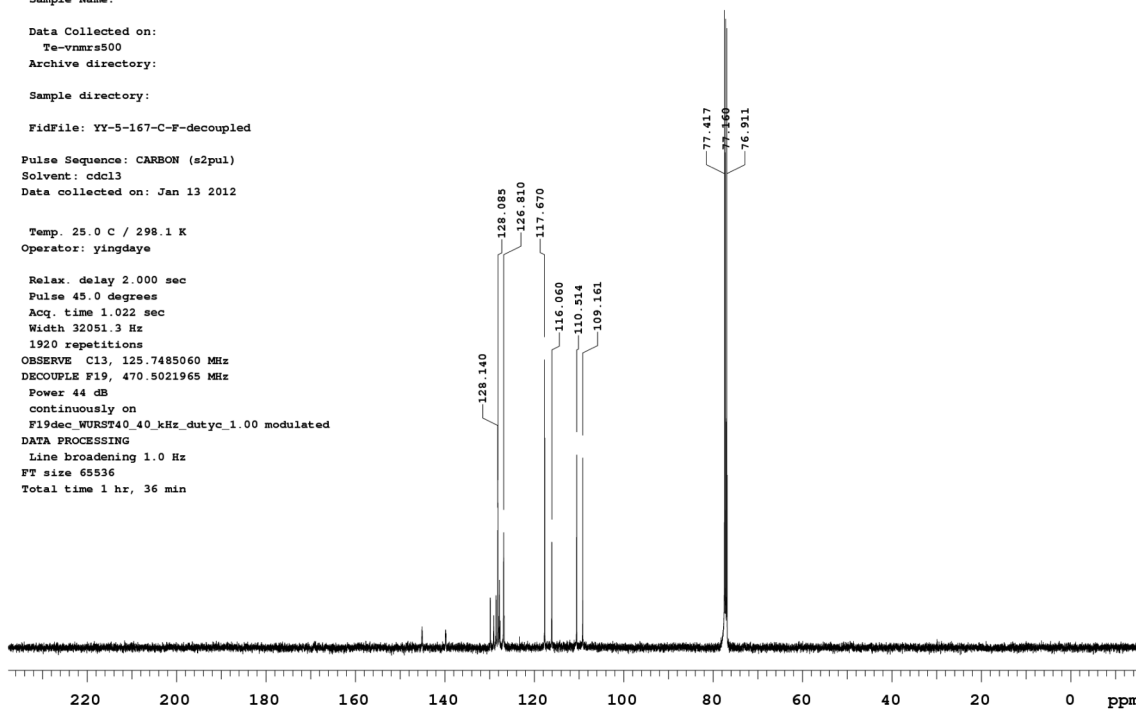

YY-5-167-C-F-decoupled

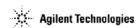

Sample Name:

Data Collected on:

Te-vnmrs500

Archive directory:

Sample directory:

FidFile: YY-5-167-C-F-decoupled

Pulse Sequence: CARBON (s2pul)

Solvent:  $\text{cdcl}_3$

Data collected on: Jan 13 2012

Temp. 25.0 C / 298.1 K

Operator: yingdaye

Relax. delay 2.000 sec

Pulse 45.0 degrees

Acq. time 1.022 sec

Width 32051.3 Hz

1920 repetitions

OBSERVE  $\text{Cl}_3$ , 125.7485060 MHz

DECOUPLE  $\text{F}_{19}$ , 470.5021965 MHz

Power 44 dB

continuously on

$\text{F}_{19}\text{dec\_WURST40\_40\_kHz\_duty\_1.00}$  modulated

DATA PROCESSING

Line broadening 1.0 Hz

FT size 65536

Total time 1 hr, 36 min

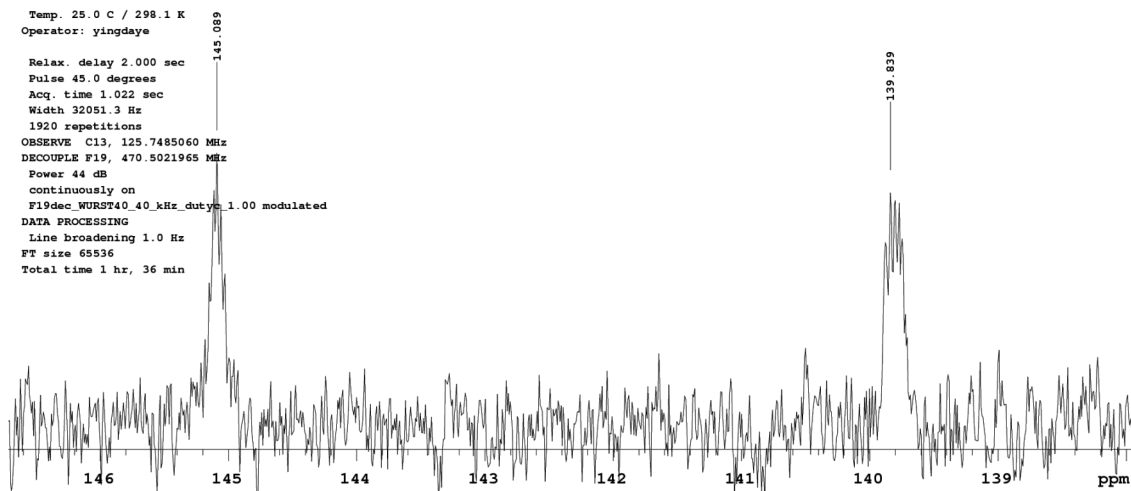

YY-5-167-C-F-decoupled

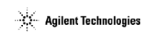

Sample Name:

Data Collected on:

Te-vnmrs500

Archive directory:

Sample directory:

FidFile: YY-5-167-C-F-decoupled

Pulse Sequence: CARBON (s2pul)

Solvent: cdcl3

Data collected on: Jan 13 2012

Temp. 25.0 C / 298.1 K

Operator: yingdaye

Relax. delay 2.000 sec

Pulse 45.0 degrees

Acq. time 1.022 sec

Width 32051.3 Hz

1920 repetitions

OBSERVE C13 125.7485060 MHz

DECOUPLE F19 40.5021965 MHz

Power 44 dB

continuously off

F19dec\_MURST40 40\_kHz\_dutyc\_1.00 modulate

DATA PROCESSING

Line broadening 1.0 Hz

FT size 65536

Total time 1 hr, 36 min

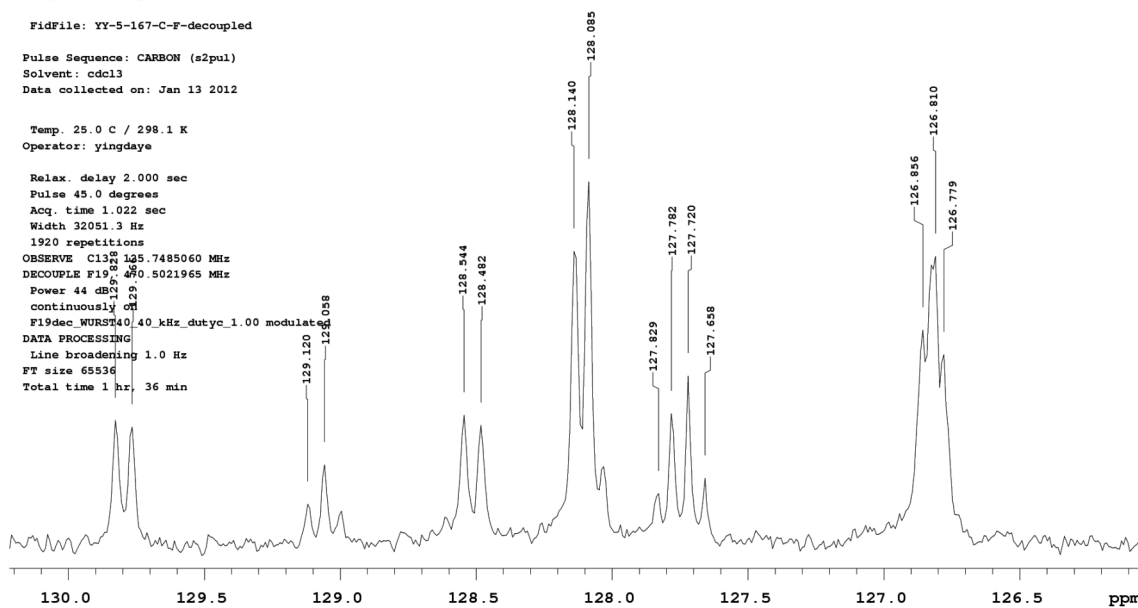

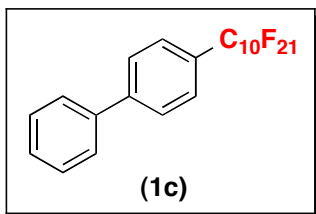

<sup>1</sup>H NMR

YY-5-176-H

Agilent Technologies

Sample Name:

Data Collected on:  
Te-vnmrs500

Archive directory:

Sample directory:

FidFile: YY-5-176-H

Pulse Sequence: PROTON (s2pul)  
Solvent: cdcl3  
Data collected on: Jan 12 2012

Temp. 25.0 C / 298.1 K  
Operator: yingdaye

Relax. delay 0.500 sec  
Pulse 45.0 degrees  
Acq. time 3.500 sec  
Width 8012.8 Hz  
16 repetitions  
OBSERVE H1, 500.0931692 MHz  
DATA PROCESSING  
Line broadening 0.3 Hz  
FT size 65536  
Total time 1 min 12 sec

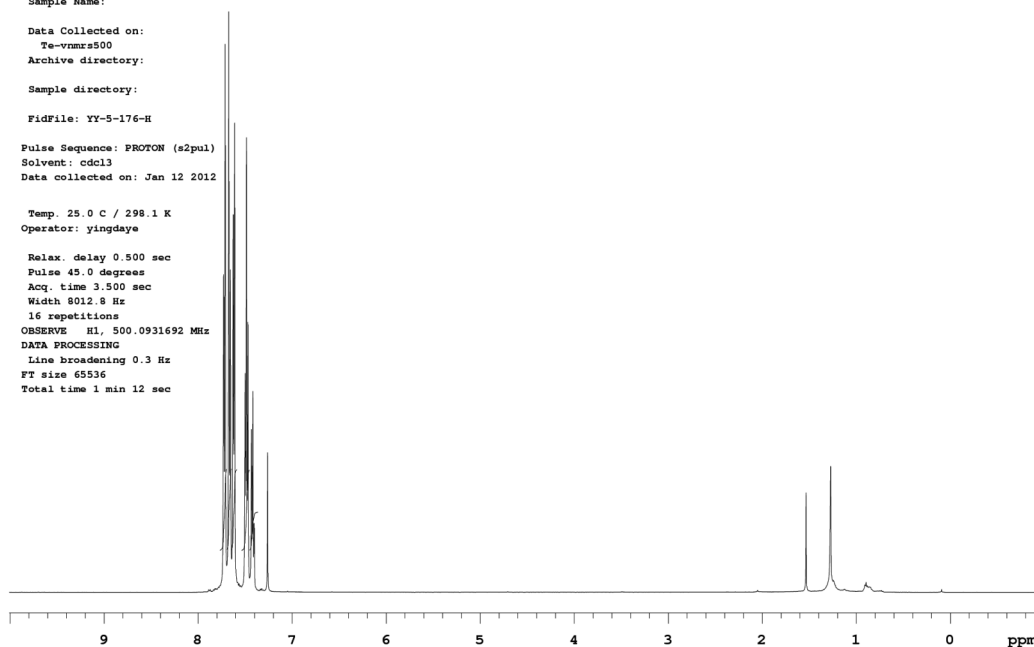

YY-5-176-H

Agilent Technologies

Sample Name:

Data Collected on:  
Te-vnmrs500

Archive directory:

Sample directory:

FidFile: YY-5-176-H

Pulse Sequence: PROTON (s2pul)  
Solvent: cdcl3  
Data collected on: Jan 12 2012

Temp. 25.0 C / 298.1 K  
Operator: yingdaye

Relax. delay 0.500 sec  
Pulse 45.0 degrees  
Acq. time 3.500 sec  
Width 8012.8 Hz  
16 repetitions  
OBSERVE H1, 500.0931692 MHz  
DATA PROCESSING  
Line broadening 0.3 Hz  
FT size 65536  
Total time 1 min 12 sec

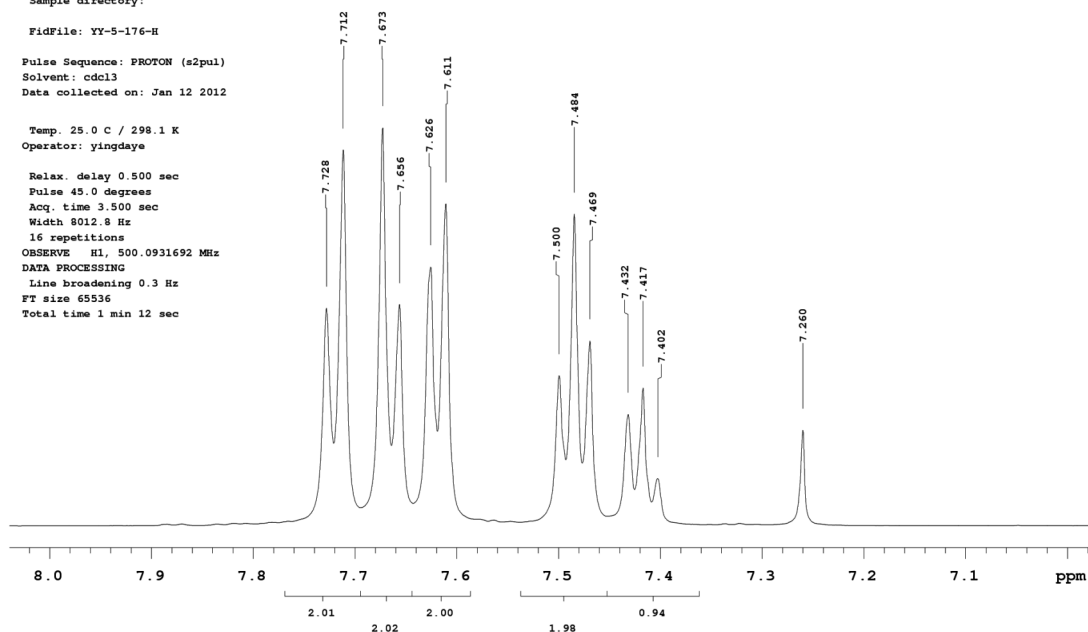

# <sup>19</sup>F NMR

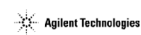

YY-5-176-F

Sample Name:

Data Collected on:

Te-vnmrs500

Archive directory:

Sample directory:

FidFile: YY-5-176-F

Pulse Sequence: FLUORINE (s2pul)

Solvent: cdcl3

Data collected on: Jan 12 2012

Temp. 25.0 C / 298.1 K  
Operator: yingdaye

Relax. delay 2.000 sec  
Pulse 30.0 degrees  
Acq. time 2.000 sec  
Width 108.7 kHz  
16 repetitions  
OBSERVE F19, 470.5577223 MHz  
DATA PROCESSING  
Line broadening 1.5 Hz  
FT size 524288  
Total time 1 min 12 sec

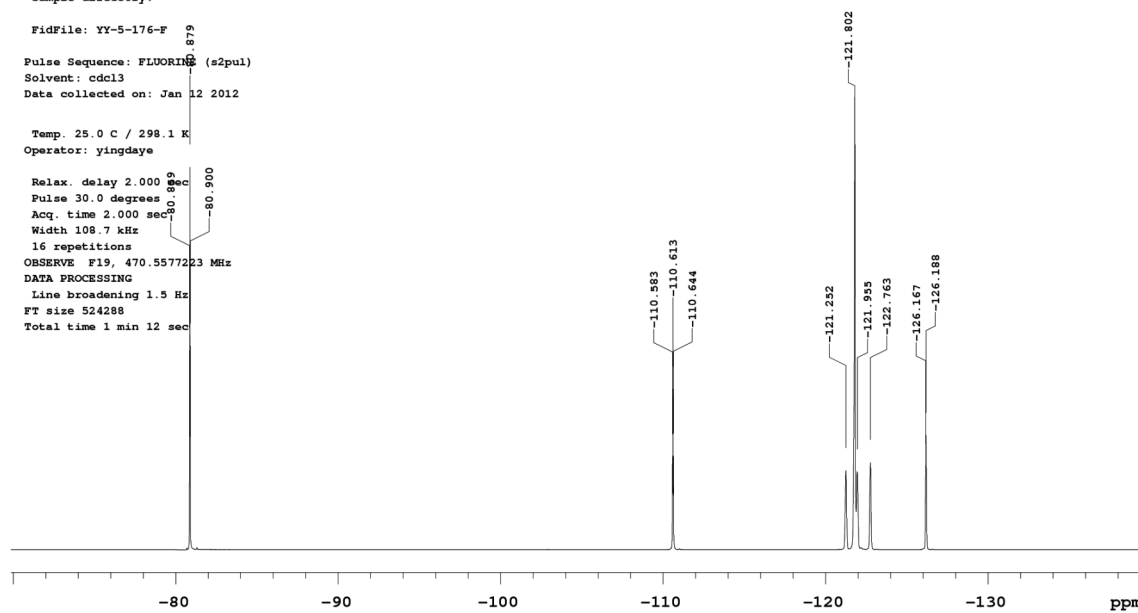

$^{13}\text{C}$  NMR ( $^1\text{H}$  decoupled,  $\text{CDCl}_3$ , 25 °C):

YY-5-176-C

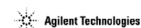

Sample Name:

Data Collected on:

Te-vnmrs500

Archive directory:

Sample directory:

FidFile: YY-5-176-C

Pulse Sequence: CARBON (s2pul)

Solvent:  $\text{cdcl}_3$

Data collected on: Jan 12 2012

Temp. 25.0 C / 298.1 K

Operator: yingdaye

Relax. delay 0.100 sec

Pulse 45.0 degrees

Acq. time 1.022 sec

Width 32051.3 Hz

7376 repetitions

OBSERVE C13, 125.7485040 MHz

DECOUPLE H1, 500.0956704 MHz

Power 42 dB

continuously on

WALTZ-16 modulated

DATA PROCESSING

Line broadening 1.0 Hz

FT size 65536

Total time 2 hr, 17 min

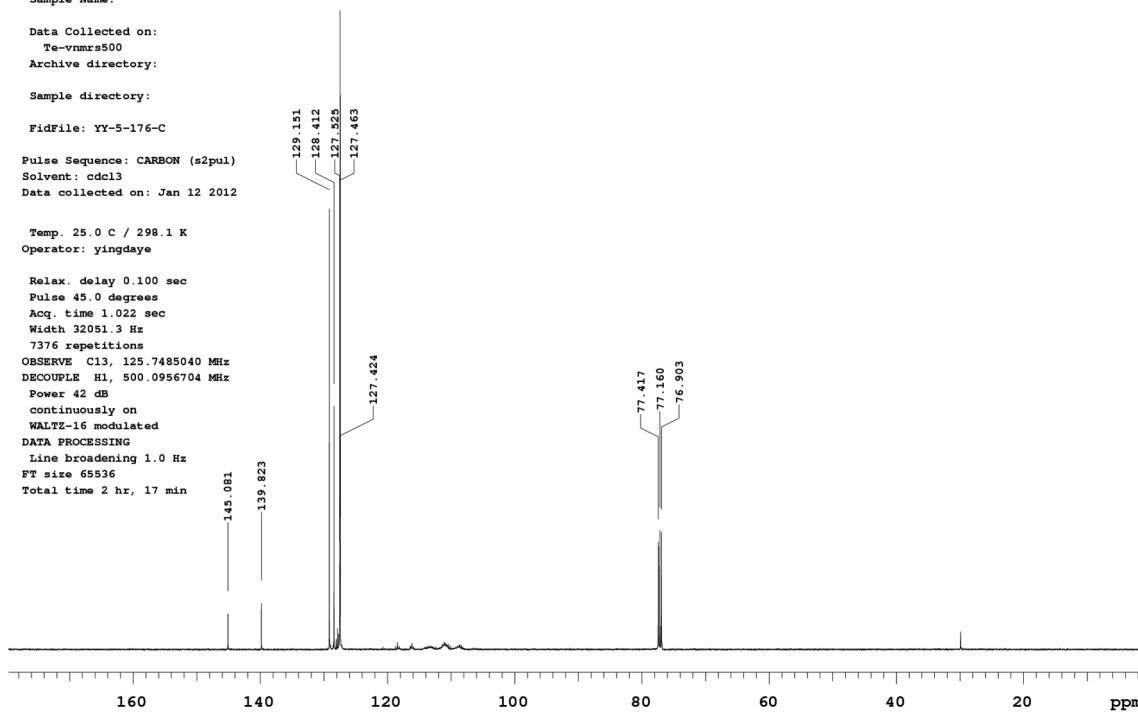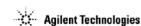

Sample Name:

Data Collected on:

Te-vnmrs500

Archive directory:

Sample directory:

FidFile: YY-5-176-C

Pulse Sequence: CARBON (s2pul)

Solvent:  $\text{cdcl}_3$

Data collected on: Jan 12 2012

Temp. 25.0 C / 298.1 K

Operator: yingdaye

Relax. delay 0.100 sec

Pulse 45.0 degrees

Acq. time 1.022 sec

Width 32051.3 Hz

7376 repetitions

OBSERVE C13, 125.7485040 MHz

DECOUPLE H1, 500.0956704 MHz

Power 42 dB

continuously on

WALTZ-16 modulated

DATA PROCESSING

Line broadening 1.0 Hz

FT size 65536

Total time 2 hr, 17 min

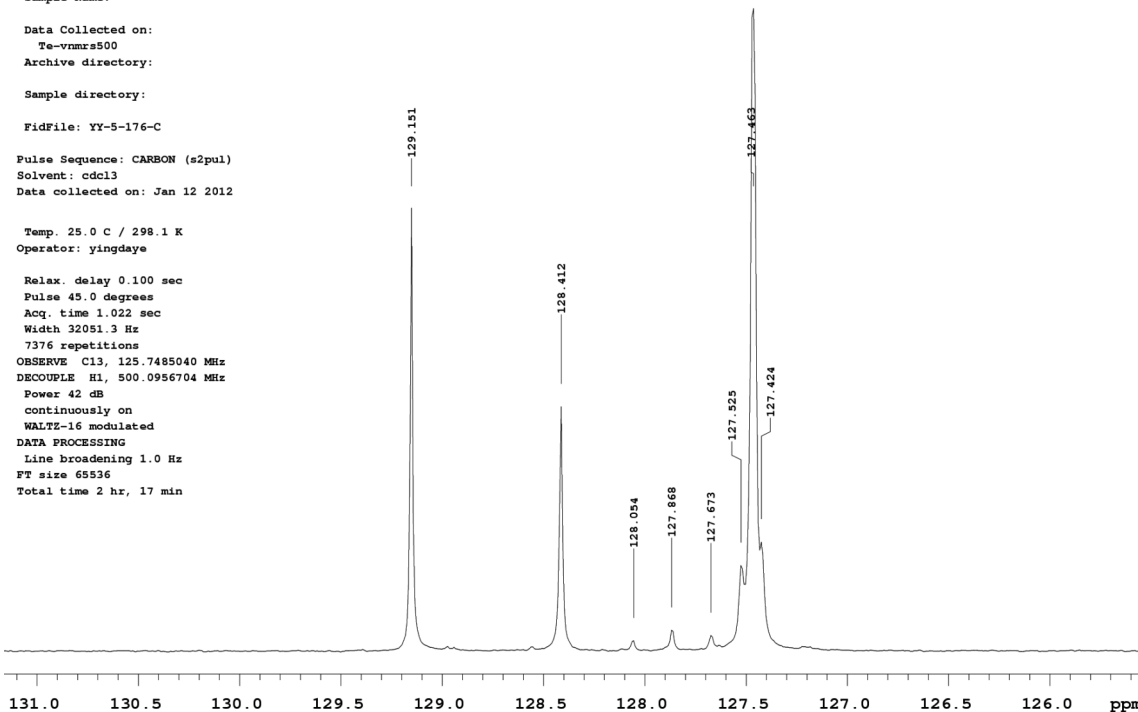

$^{13}\text{C}$  NMR ( $^{19}\text{F}$  decoupled,  $\text{CDCl}_3$ , 25 °C):

YY-5-176-C-decouple-F

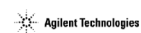

Sample Name:

Data Collected on:

Te-vnmrs500

Archive directory:

Sample directory:

FidFile: YY-5-176-C-decouple-F

Pulse Sequence: CARBON (s2pul)

Solvent:  $\text{cdcl}_3$

Data collected on: Jan 12 2012

Temp. 25.0 C / 298.1 K  
Operator: yingdaye

Relax. delay 2.000 sec

Pulse 45.0 degrees

Acq. time 1.022 sec

Width 32051.3 Hz

832 repetitions

OBSERVE C13, 125.7485040 MHz

DECOUPLE F19, 470.999437 MHz

Power 44 dB

on during acquisition

off during delay

F19dec\_WURST40\_40 kHz duty 1.00 modulated

DATA PROCESSING

Line broadening 1.0 Hz

FT size 65536

Total time 41 min

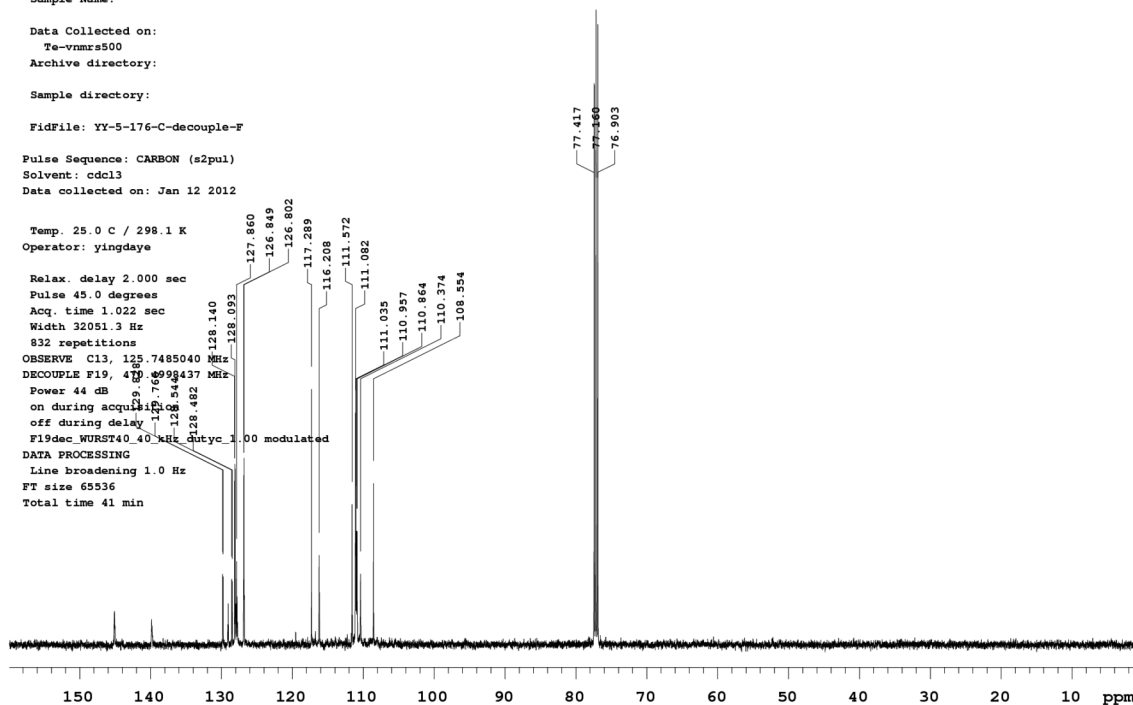

YY-5-176-C-decouple-F

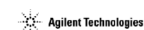

Sample Name:

Data Collected on:

Te-vnmrs500

Archive directory:

Sample directory:

FidFile: YY-5-176-C-decouple-F

Pulse Sequence: CARBON (s2pul)

Solvent:  $\text{cdcl}_3$

Data collected on: Jan 12 2012

Temp. 25.0 C / 298.1 K  
Operator: yingdaye

Relax. delay 2.000 sec

Pulse 45.0 degrees

Acq. time 1.022 sec

Width 32051.3 Hz

832 repetitions

OBSERVE C13, 125.7485040 MHz

DECOUPLE F19, 470.999437 MHz

Power 44 dB

on during acquisition

off during delay

F19dec\_WURST40\_40 kHz duty 1.00 modulated

DATA PROCESSING

Line broadening 1.0 Hz

FT size 65536

Total time 41 min

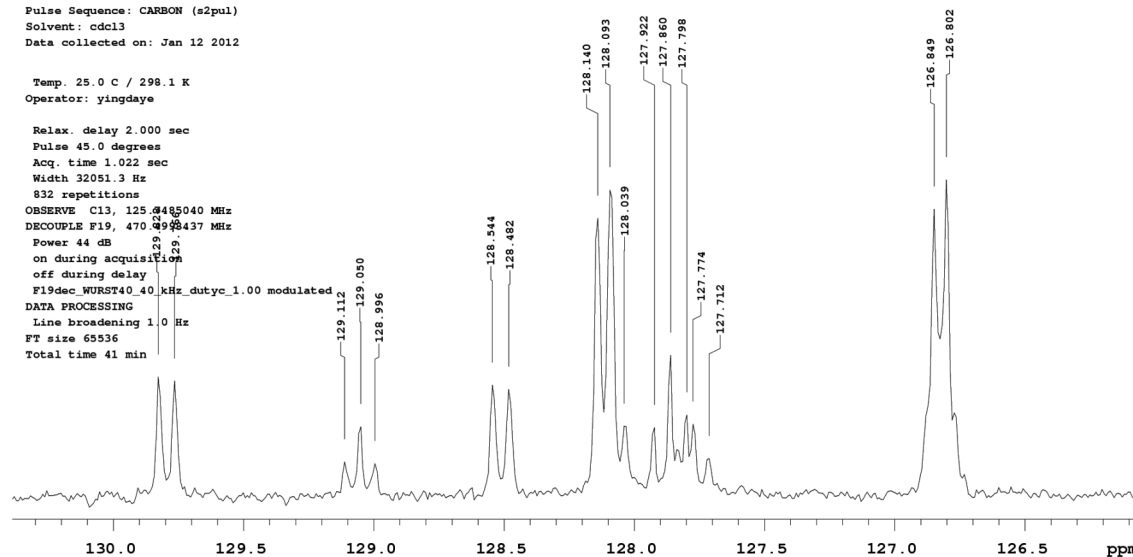

YY-5-176-C-decouple-F

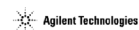

Sample Name:

Data Collected on:

Te-vnmrs500

Archive directory:

Sample directory:

FidFile: YY-5-176-C-decouple-F

Pulse Sequence: CARBON (s2pul)

Solvent: cdcl3

Data collected on: Jan 12 2012

Temp. 25.0 C / 298.1 K

Operator: yingdaye

Relax. delay 2.000 sec

Pulse 45.0 degrees

Acq. time 1.022 sec

Width 32051.3 Hz

832 repetitions

OBSERVE C13, 125.7485040 MHz

DECOUPLE F19, 470.4998437 MHz

Power 44 dB

on during acquisition

off during delay

F19dec\_WURST40\_40\_kHz\_dutyc\_1.00 modulated

DATA PROCESSING

Line broadening 1.0 Hz

FT size 65536

Total time 41 min

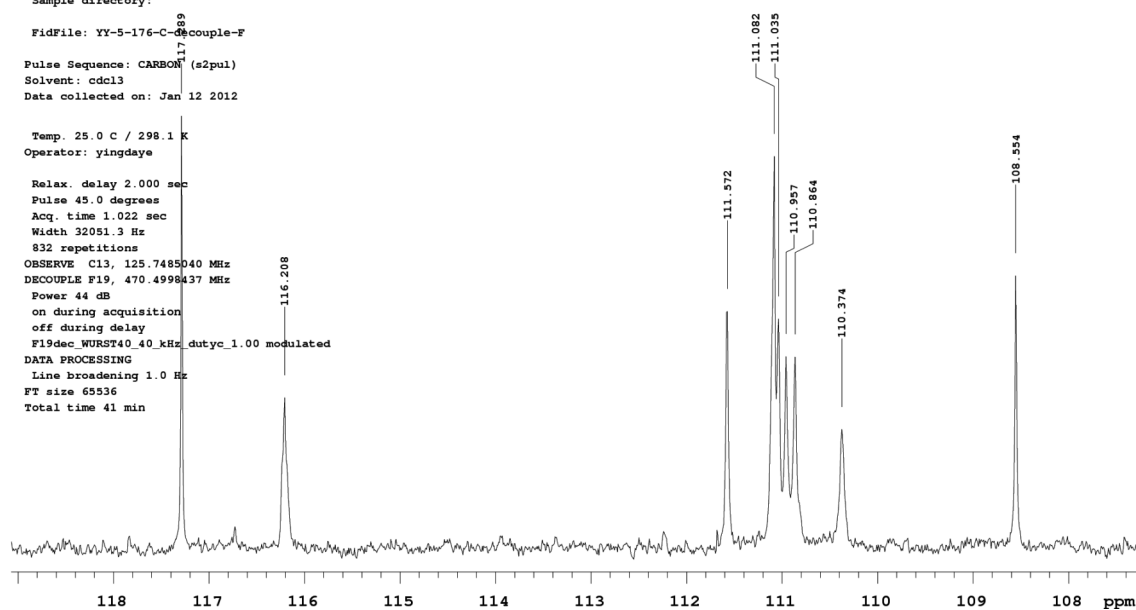

# NMR Spectra of Isolated Products (Previously Reported Compounds)

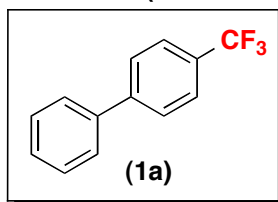

<sup>1</sup>H NMR

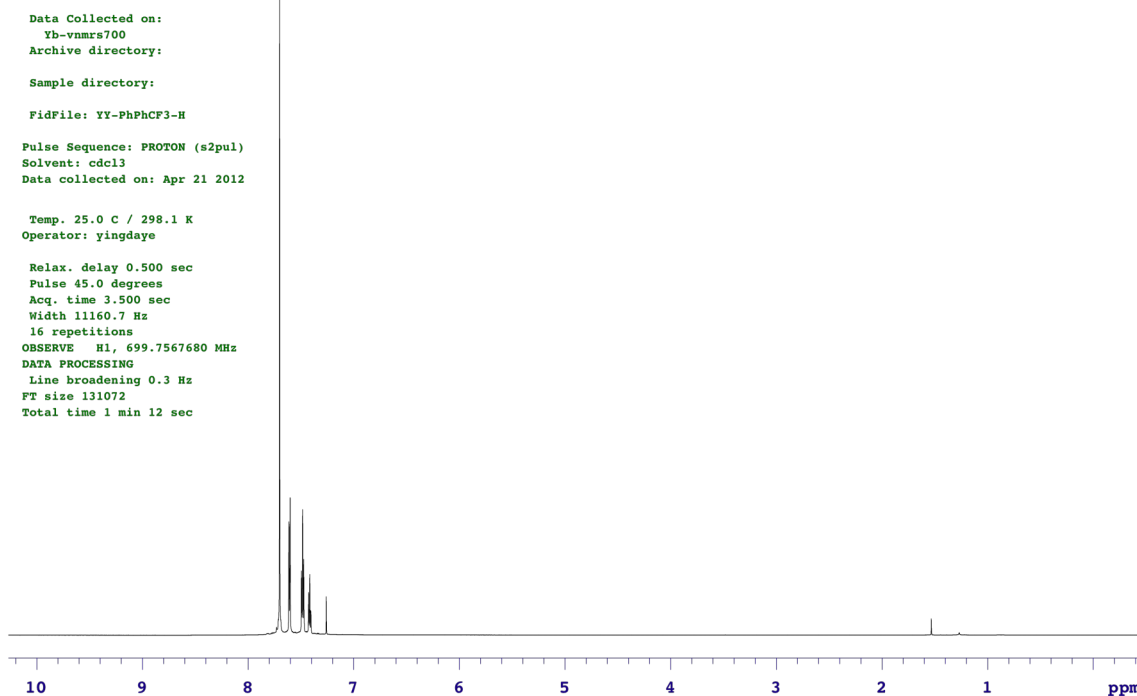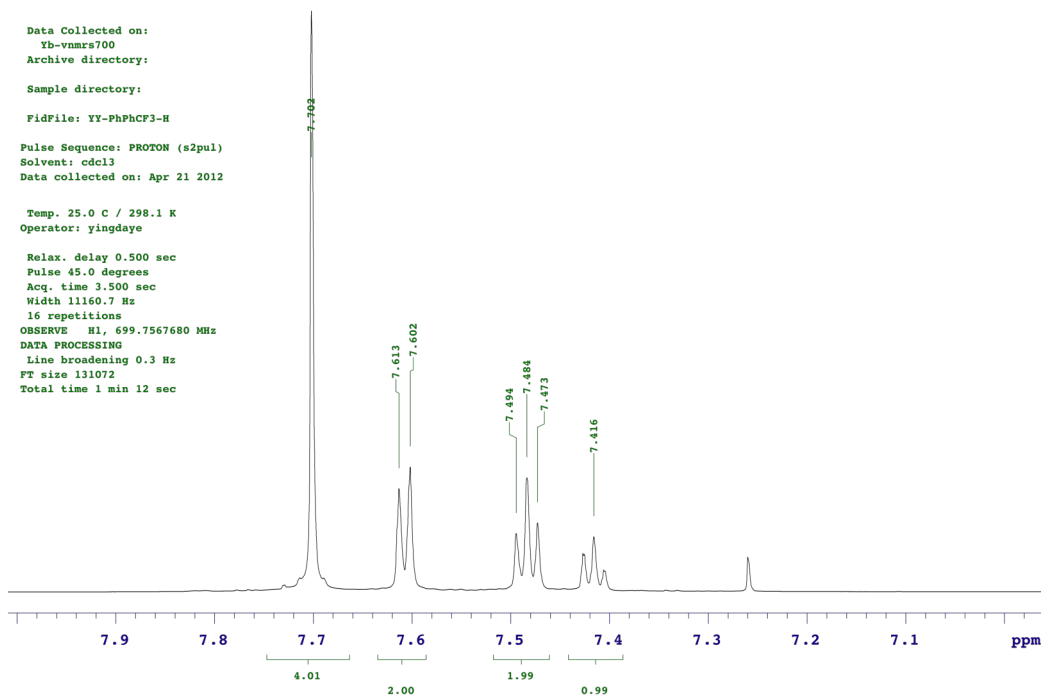

# <sup>19</sup>F NMR

Data Collected on:  
Co.Chem.LSA.UMich.edu-vnmrs400  
Archive directory:

Sample directory:

FidFile: YY-PhPhCF3-F

Pulse Sequence: FLUORINE (s2pul)  
Solvent: cdcl3  
Data collected on: Apr 21 2012

Operator: yingdaye

Relax. delay 1.000 sec  
Pulse 30.0 degrees  
Acq. time 0.734 sec  
Width 89285.7 Hz  
16 repetitions  
OBSERVE F19, 376.8659339 MHz  
DATA PROCESSING  
Line broadening 0.5 Hz  
FT size 131072  
Total time 0 min 31 sec

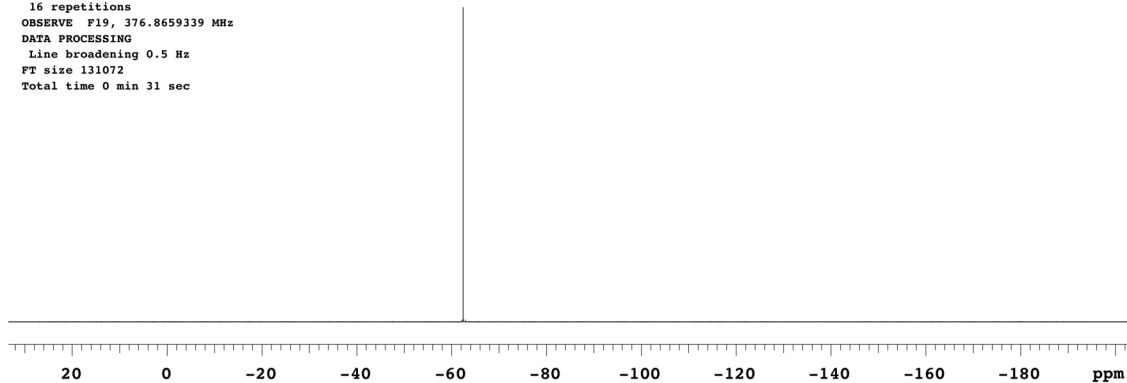

# <sup>13</sup>C NMR

Data Collected on:  
Yb-vnmrs700  
Archive directory:  
Sample directory:  
FidFile: YY-PhPhCF3-C  
Pulse Sequence: CARBON (s2pul)  
Solvent: cdcl3  
Data collected on: Apr 21 2012

Temp. 25.0 C / 298.1 K  
Operator: yingdaye

Relax. delay 0.100 sec  
Pulse 45.0 degrees  
Acq. time 1.468 sec  
Width 44642.9 Hz  
640 repetitions  
OBSERVE C13, 175.9539514 MHz  
DECOUPLE H1, 699.7602734 MHz  
Power 46 dB  
continuously on  
WALTZ-16 modulated  
DATA PROCESSING  
Line broadening 1.0 Hz  
FT size 131072  
Total time 16 min

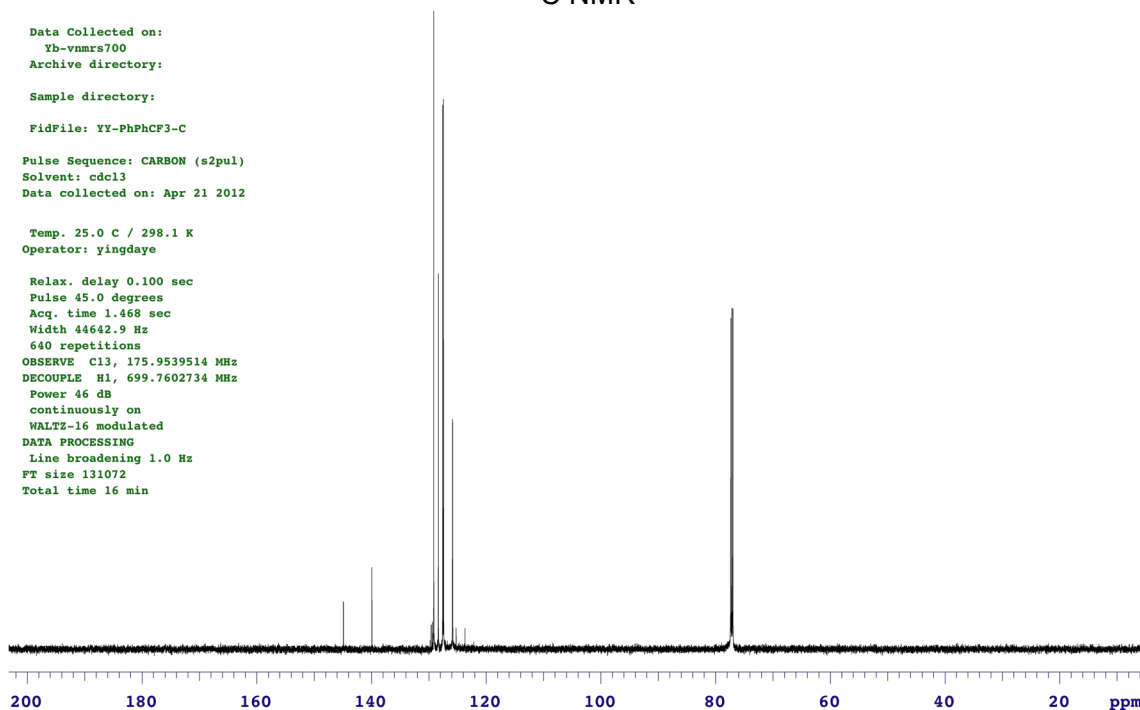

Data Collected on:  
Yb-vnmrs700  
Archive directory:  
Sample directory:  
FidFile: YY-PhPhCF3-C  
Pulse Sequence: CARBON (s2pul)  
Solvent: cdcl3  
Data collected on: Apr 21 2012

Temp. 25.0 C / 298.1 K  
Operator: yingdaye

Relax. delay 0.100 sec  
Pulse 45.0 degrees  
Acq. time 1.468 sec  
Width 44642.9 Hz  
640 repetitions  
OBSERVE C13, 175.9539514 MHz  
DECOUPLE H1, 699.7602734 MHz  
Power 46 dB  
continuously on  
WALTZ-16 modulated  
DATA PROCESSING  
Line broadening 1.0 Hz  
FT size 131072  
Total time 16 min

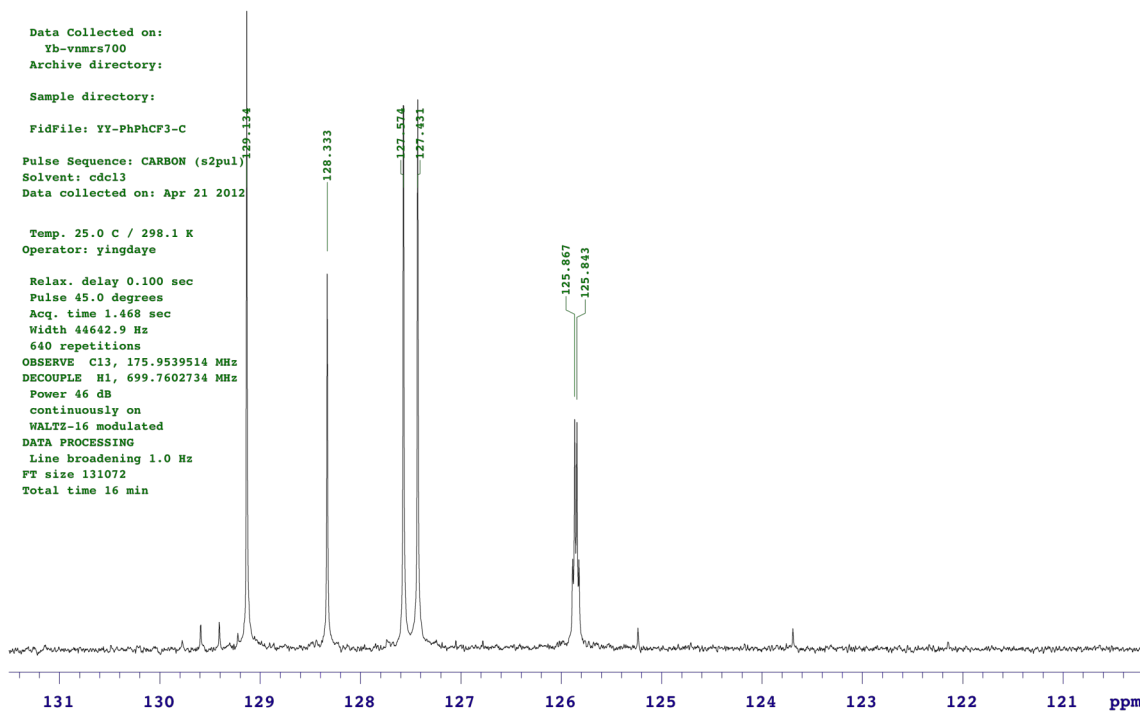

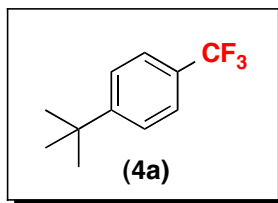

# <sup>1</sup>H NMR

YY-6-17-tBu-H

Sample Name:

Data Collected on:

Yb-vnmrs700

Archive directory:

Sample directory:

FidFile: YY-6-17-tBu-H

Pulse Sequence: PROTON (s2pul1)

Solvent: cdcl3

Data collected on: Apr 4 2012

Operator: yingdays

Relax. delay 0.500 sec

Pulse 45.0 degrees

Acq. time 3.500 sec

Width 11160.7 Hz

16 repetitions

OBSERVE H1, 699.7567747 MHz

DATA PROCESSING

Line broadening 0.3 Hz

FT size 131072

Total time 1 min 12 sec

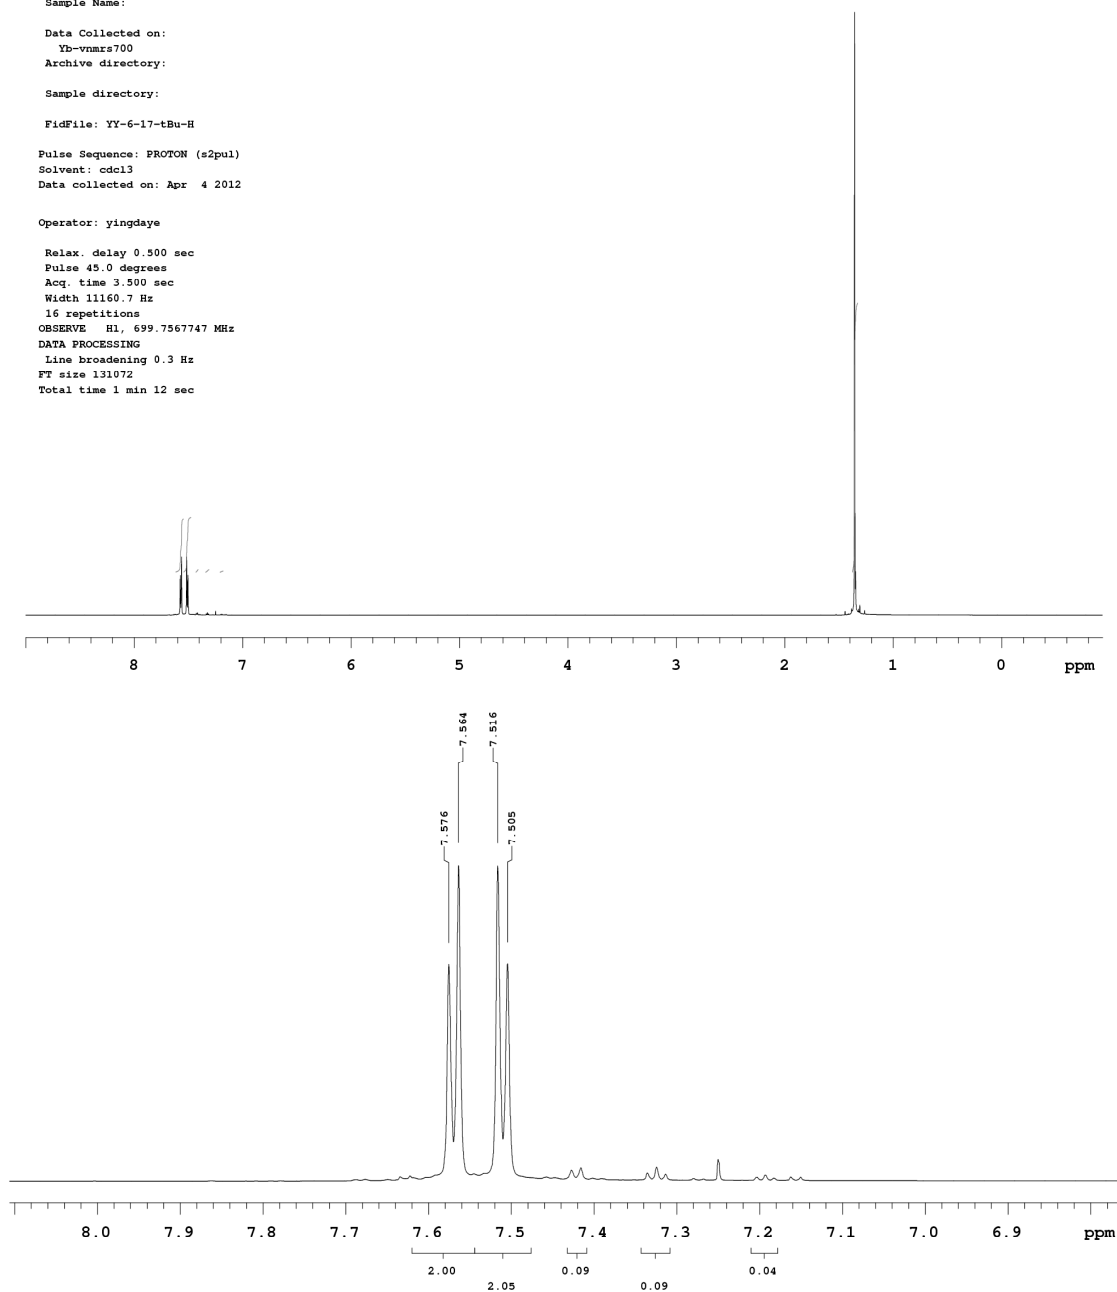

<sup>19</sup>F NMR

YY-6-17-tBu-F

Sample Name:

Data Collected on:  
Co.Chem.LSA.UMich.edu-vmrs400  
Archive directory:

Sample directory:

FidFile: YY-6-17-tBu-F

Pulse Sequence: FLUORINE (s2pul)  
Solvent: cdcl3  
Data collected on: Apr 6 2012

Operator: yingdaye

Relax. delay 1.000 sec  
Pulse 30.0 degrees  
Acq. time 0.734 sec  
Width 89285.7 Hz  
16 repetitions  
OBSERVE F19, 376.8659339 MHz  
DATA PROCESSING  
Line broadening 0.5 Hz  
FT size 131072  
Total time 0 min 31 sec

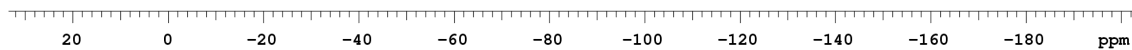

# <sup>13</sup>C NMR

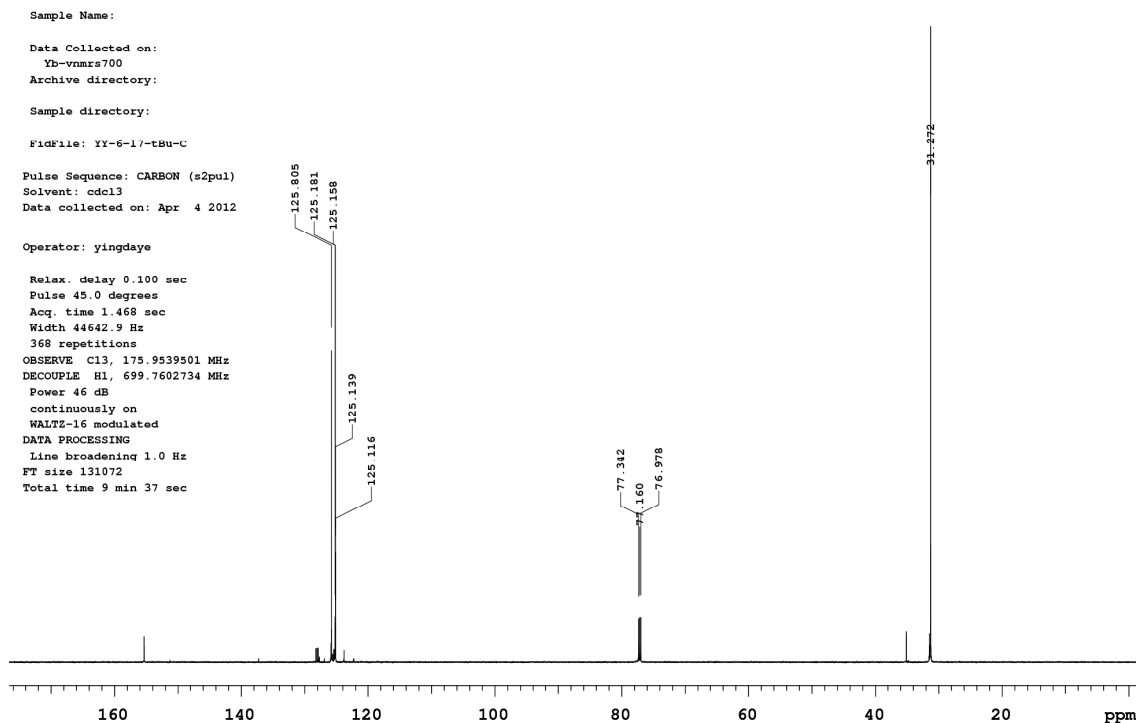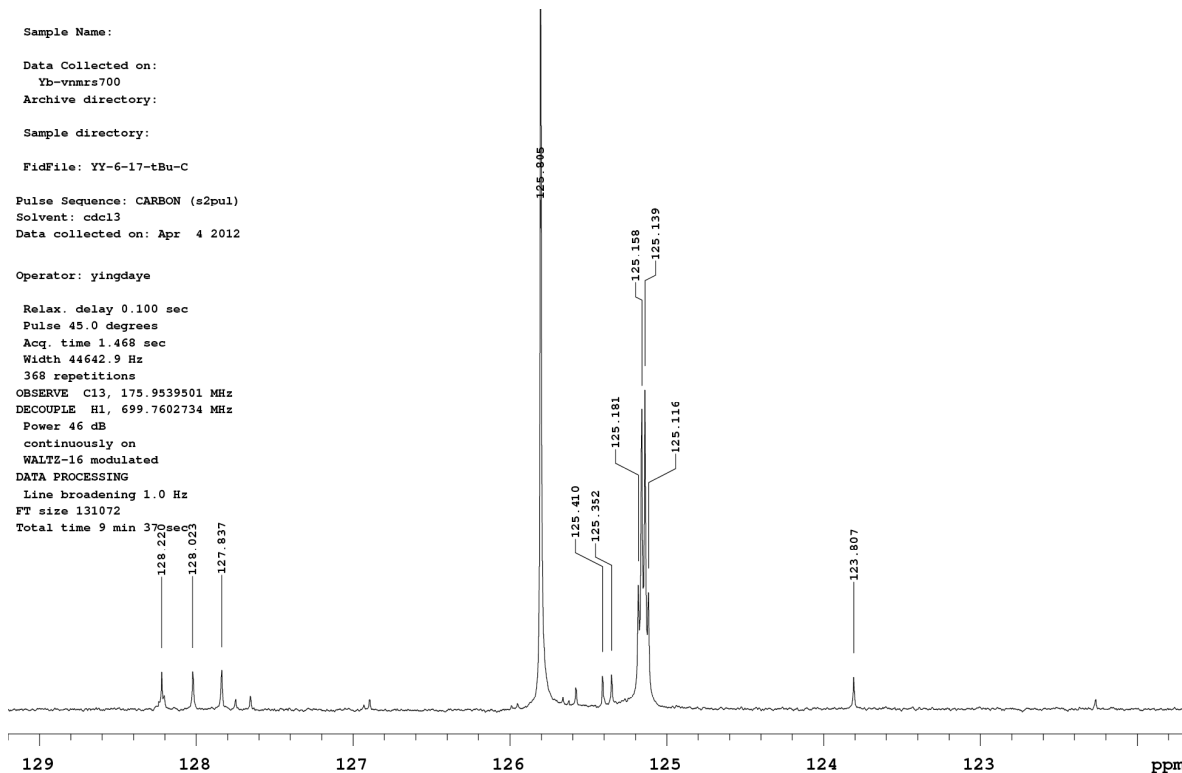

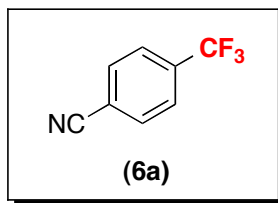

# <sup>1</sup>H NMR

Sample Name:

Data Collected on:  
Ga.Chem.LSA.UMich.edu-vnmrs400

Archive directory:

Sample directory:

FidFile: YY-6-17-CN-column-H

Pulse Sequence: PROTON (s2p1)

Solvent: cdcl3

Data collected on: Apr 18 2012

Operator: yingdays

Relax. delay 0.500 sec

Pulse 45.0 degrees

Acq. time 3.500 sec

Width 6377.6 Hz

16 repetitions

OBSERVE H1, 399.5337073 MHz

DATA PROCESSING

Line broadening 0.3 Hz

FT size 65536

Total time 1 min 12 sec

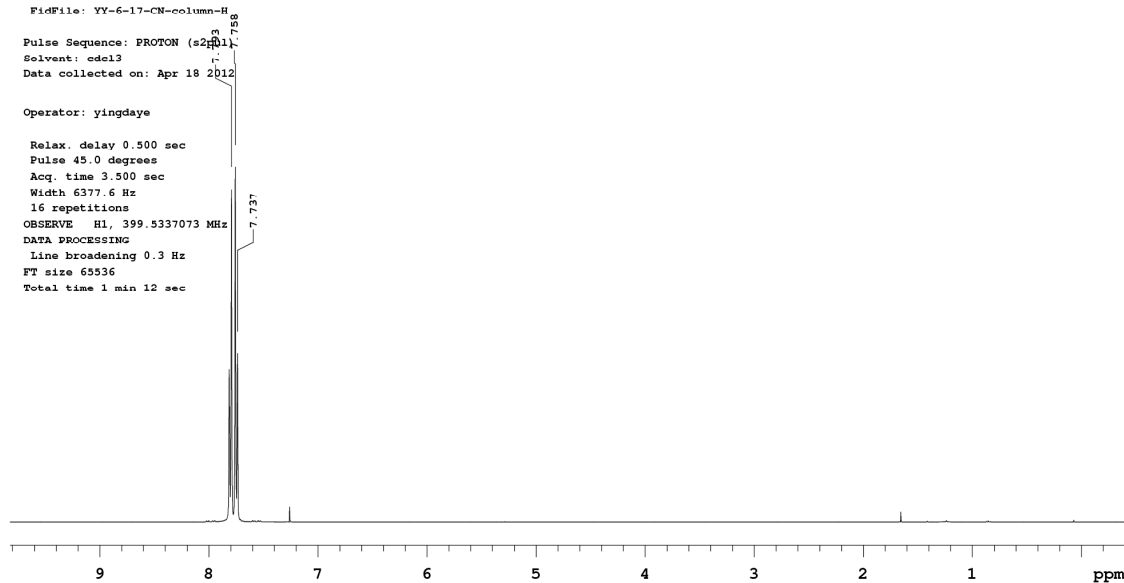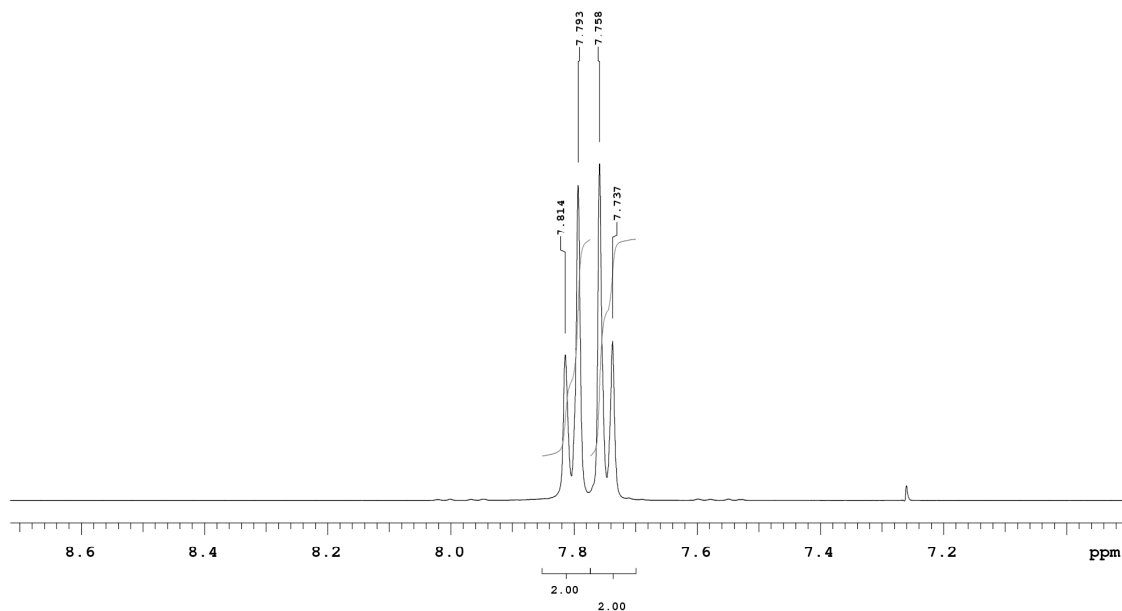

# <sup>19</sup>F NMR

Sample Name:

Data Collected on:  
Co.Chem.LSA,UMich.edu-vnmrs400  
Archive directory:

Sample directory:

FidFile: YF 6 17 CN F

Pulse Sequence: FLUORINE (s2pul)  
Solvent: cdcl3  
Data collected on: Apr 7 2012

Operator: yingdaye

Relax. delay 1.000 sec  
Pulse 30.0 degrees  
Acq. time 0.734 sec  
Width 89285.7 Hz  
16 repetitions  
OBSERVE F19, 376.8721433 MHz  
DATA PROCESSING  
Line broadening 0.5 Hz  
FT size 131072  
Total time 0 min 31 sec

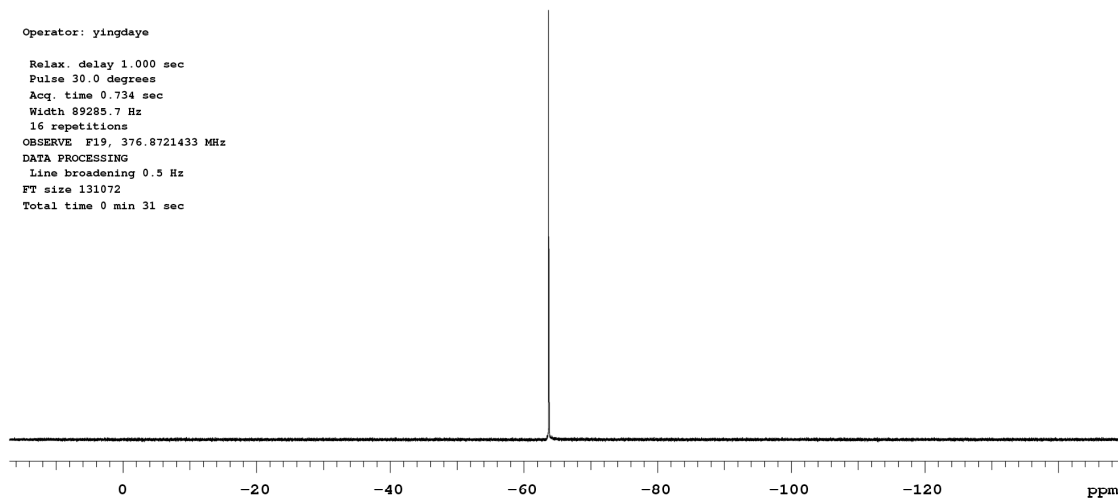

# <sup>13</sup>C NMR

Sample Name:

Data Collected on:  
Ga.Chem.LSA.UMich.edu-vmrs400  
Archive directory:

Sample directory:

FidFile: YY-6-17-CN-column-C

Pulse Sequence: CARBON (s2pul)  
Solvent: cdc13  
Data collected on: Apr 18 2012

Operator: yingdays

Relax. delay 0.100 sec  
Pulse 45.0 degrees  
Acq. time 2.621 sec  
Width 25000.0 Hz  
240 repetitions  
OBSERVE C13, 100.4628197 MHz  
DECUPLE H1, 399.8387121 MHz  
Power 42 dB  
continuously on  
WALTZ-16 modulated  
DATA PROCESSING  
Line broadening 1.0 Hz  
FT size 1310/2  
Total time 10 min

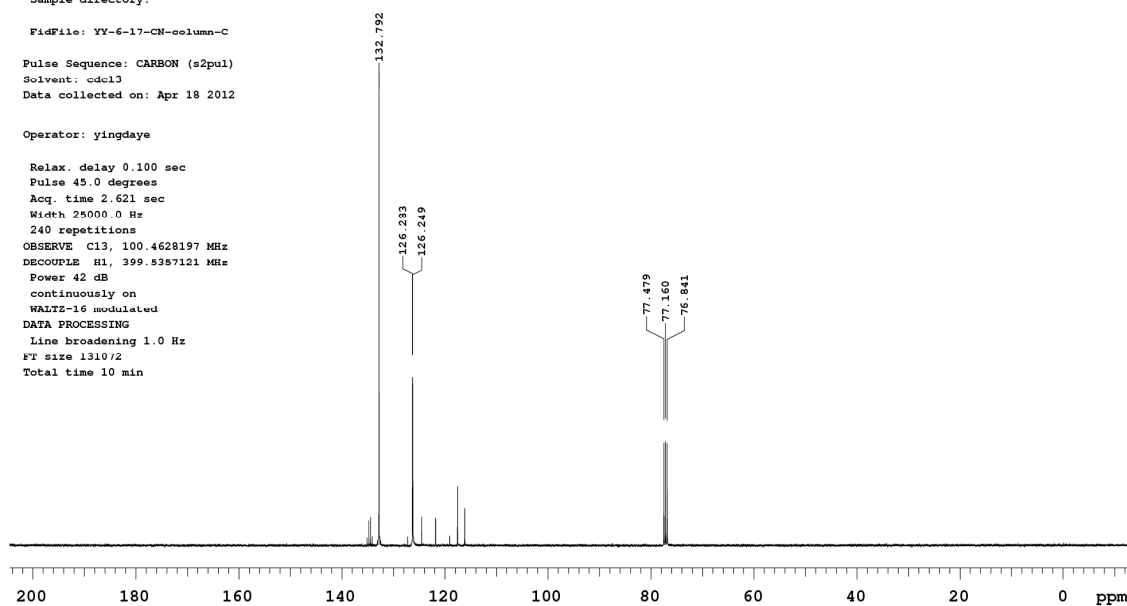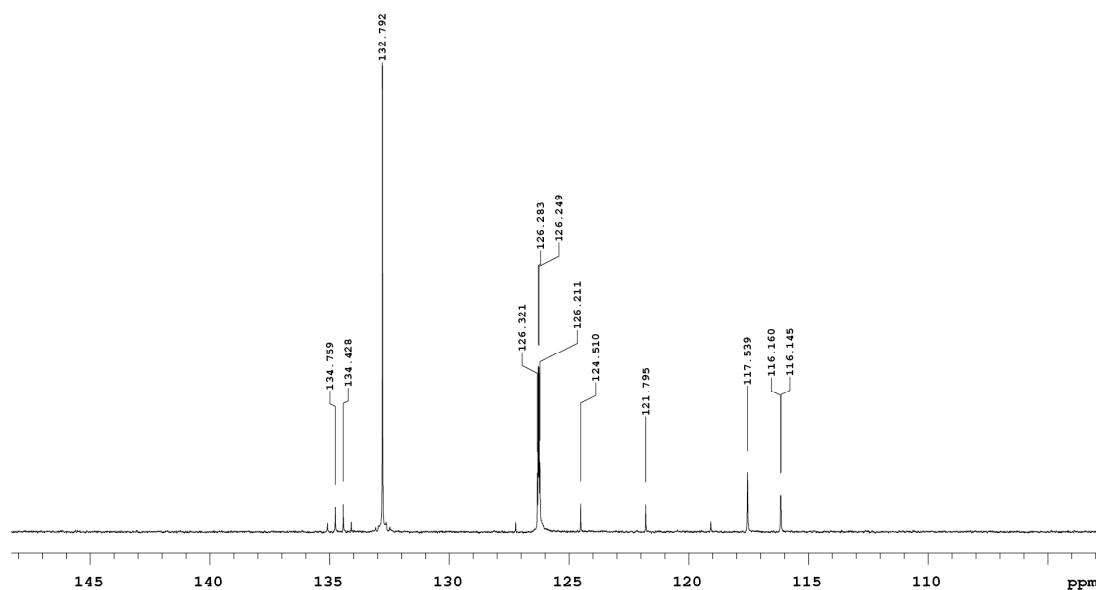

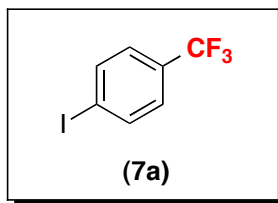

# <sup>1</sup>H NMR

Sample Name:  
 Data Collected on:  
 YD-vnmrs700  
 Archive directory:  
 Sample directory:  
 FidFile: YY-6-17-I-H  
 Pulse Sequence: PROTON (s2pul)  
 Solvent: cdcl3  
 Data collected on: Apr 4 2012  
 Operator: yingdaye  
 Relax. delay 0.500 sec  
 Pulse 45.0 degrees  
 Acq. time 3.500 sec  
 Width 11160.7 Hz  
 16 repetitions  
 OBSERVE H1, 699.7567678 MHz  
 DATA PROCESSING  
 Line broadening 0.3 Hz  
 FT size 131072  
 Total time 1 min 12 sec

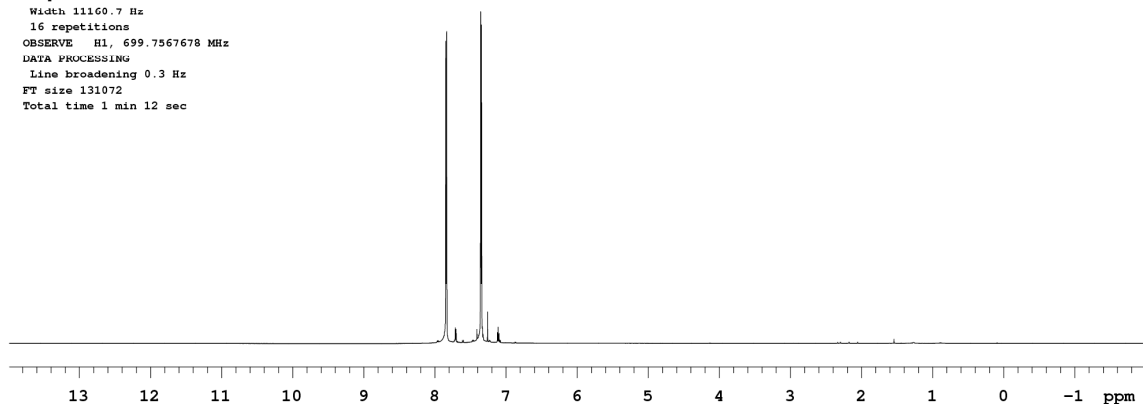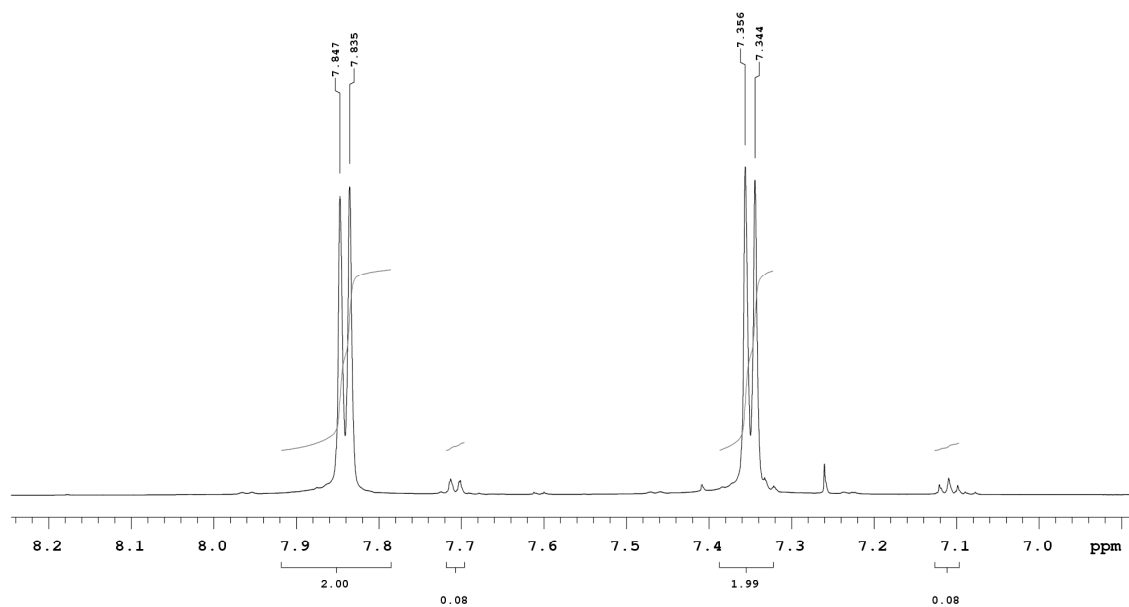

<sup>19</sup>F NMR

Sample Name:

Data Collected on:  
Co.Chem.LSA.UMich.edu-vnmrs400  
Archive directory:

Sample directory:

FidFile: YY-6-17-I-F

Pulse Sequence: FLUORINE (s2pul)  
Solvent: cdcl3  
Data collected on: Apr 6 2012

Operator: yingdaye

Relax. delay 1.000 sec  
Pulse 30.0 degrees  
Acq. time 0.734 sec  
Width 89285.7 Hz  
16 repetitions  
OBSERVE F19, 376.8659339 MHz  
DATA PROCESSING  
Line broadening 0.5 Hz  
FT size 131072  
Total time 0 min 31 sec

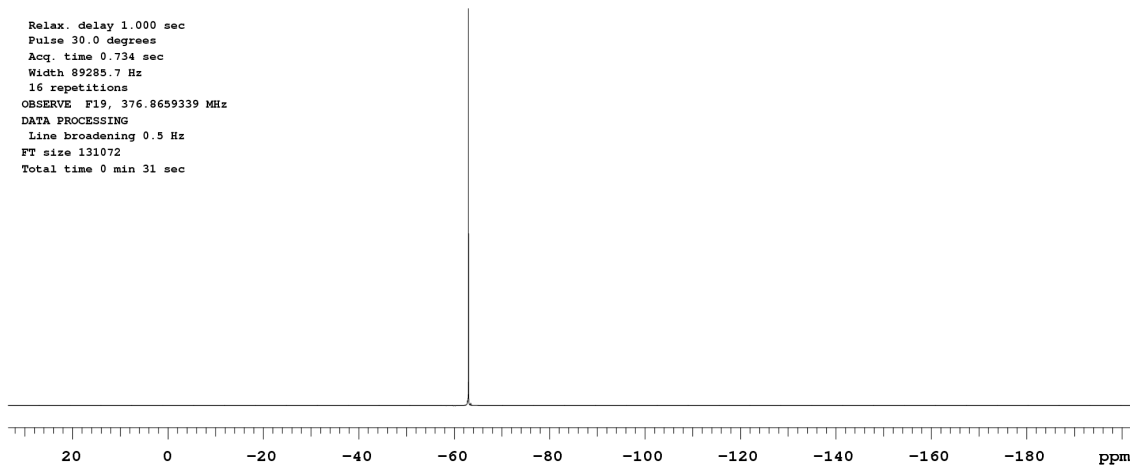

# <sup>13</sup>C NMR

Sample Name:  
Data Collected on:  
Yb-vnmrs700  
Archive directory:  
Sample directory:  
FidFile: YY-6-17-I-C  
Pulse Sequence: CARBON (s2pul)  
Solvent: cdcl3  
Data collected on: Apr 4 2012

Operator: yingdaye

Relax. delay 0.100 sec  
Pulse 45.0 degrees  
Acq. time 1.468 sec  
Width 44642.9 Hz  
416 repetitions  
OBSERVE C13, 175.9539547 MHz  
DECOUPLE H1, 699.7602734 MHz  
Power 46 dB  
continuously on  
WALTZ-16 modulated  
DATA PROCESSING  
Line broadening 1.0 Hz  
FT size 131072  
Total time 10 min

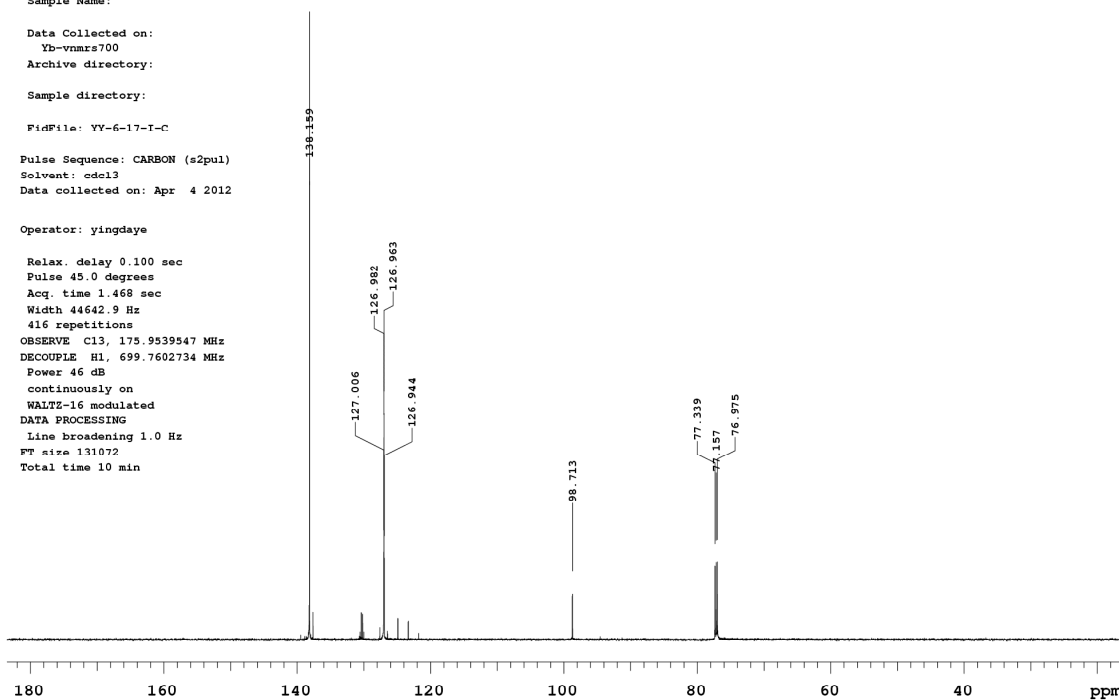

Sample Name:  
Data Collected on:  
Yb-vnmrs700  
Archive directory:  
Sample directory:  
FidFile: YY-6-17-I-C  
Pulse Sequence: CARBON (s2pul)  
Solvent: cdcl3  
Data collected on: Apr 4 2012

Operator: yingdaye

Relax. delay 0.100 sec  
Pulse 45.0 degrees  
Acq. time 1.468 sec  
Width 44642.9 Hz  
416 repetitions  
OBSERVE C13, 175.9539547 MHz  
DECOUPLE H1, 699.7602734 MHz  
Power 46 dB  
continuously on  
WALTZ-16 modulated  
DATA PROCESSING  
Line broadening 1.0 Hz  
FT size 131072  
Total time 10 min

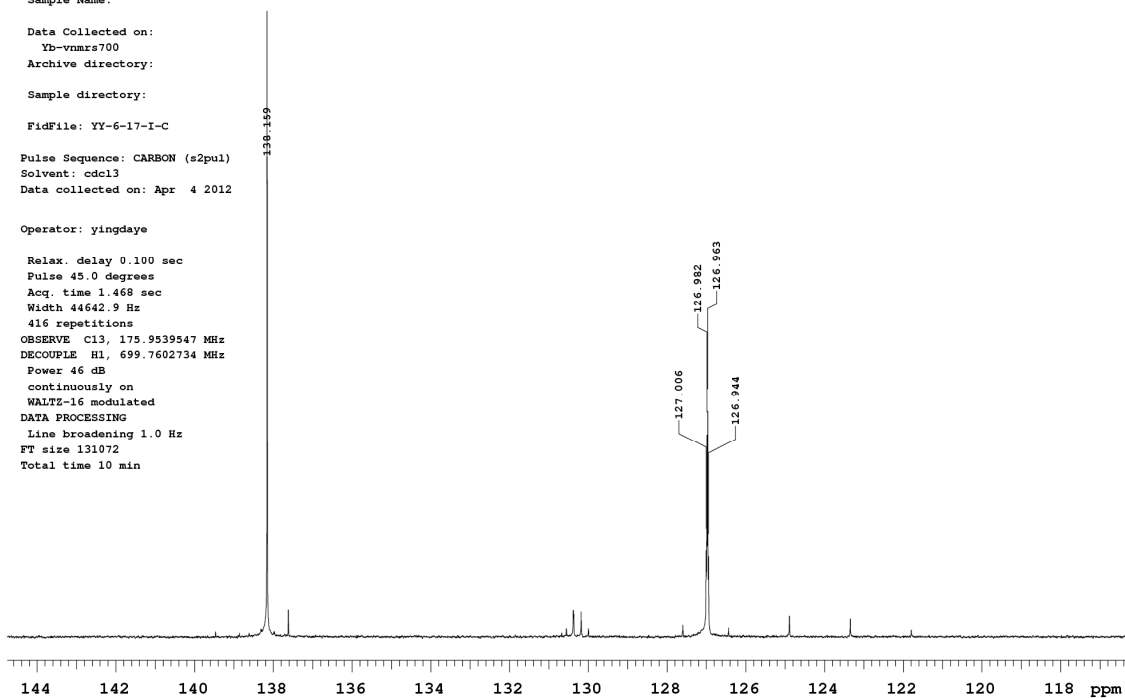

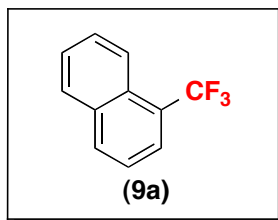

# <sup>1</sup>H NMR

Data Collected on:  
 Yb-vnmrs700  
 Archive directory:  
 Sample directory:  
 FidFile: YY-6-17-naphthalene-H  
 Pulse Sequence: PROTON (s2pul)  
 Solvent: cdcl3  
 Data collected on: Apr 4 2012

Operator: yingdaye

Relax. delay 0.500 sec  
 Pulse 45.0 degrees  
 Acq. time 3.500 sec  
 Width 11160.7 Hz  
 16 repetitions  
 OBSERVE H1, 699.7567676 MHz  
 DATA PROCESSING  
 Line broadening 0.3 Hz  
 FT size 131072  
 Total time 1 min 12 sec

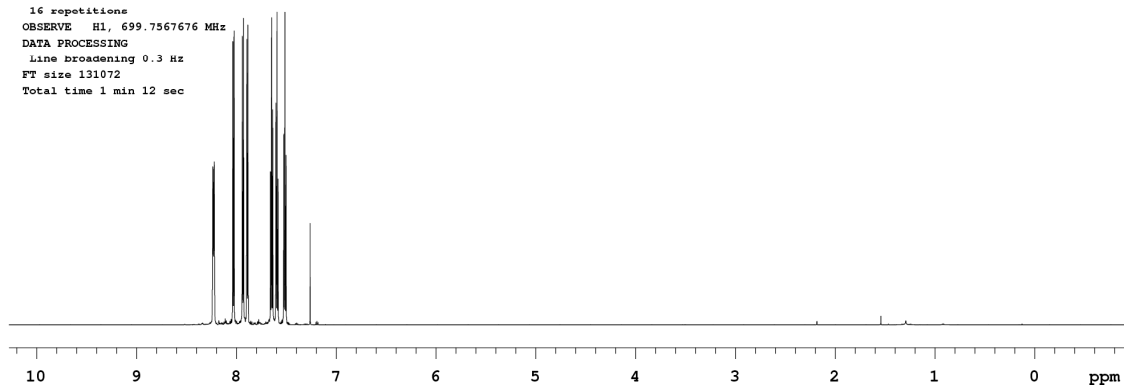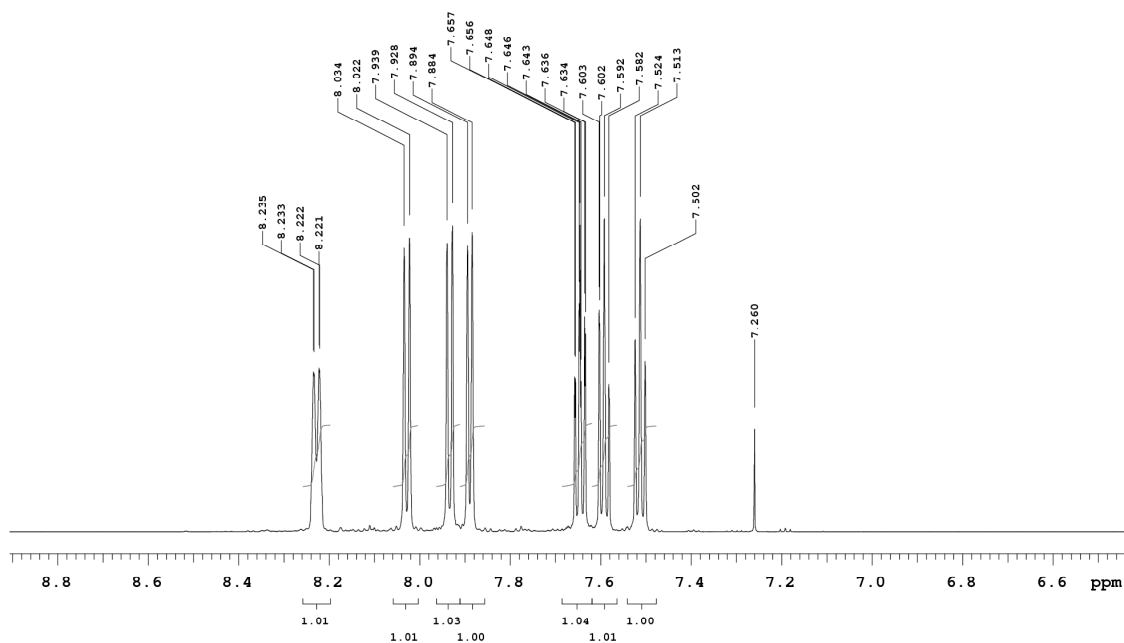

<sup>19</sup>F NMR

Data Collected on:  
Ga.Chem.LSA,UMich.edu-vnmrs400  
Archive directory:

Sample directory:

FidFile: YY-6-17-naphthalene-2-F

Pulse Sequence: FLUORINE (s2pul)  
Solvent: cdc13  
Data collected on: Apr 6 2012

Operator: yingdaye

Relax. delay 1.000 sec  
Pulse 30.0 degrees  
Acq. time 0.734 sec  
Width 89285.7 Hz  
16 repetitions  
OBSERVE F19, 375.9372972 MHz  
DATA PROCESSING  
Line broadening 0.5 Hz  
FT size 131072  
Total time 0 min 31 sec

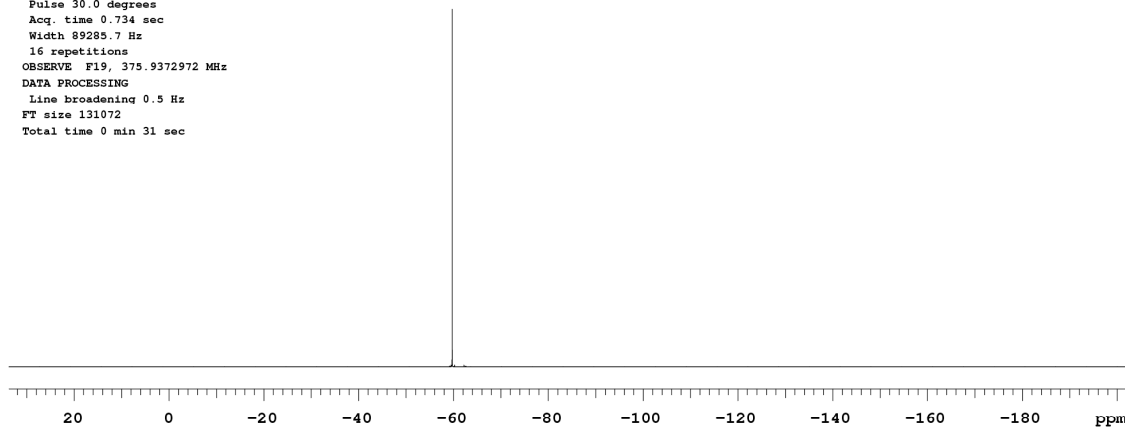

# <sup>13</sup>C NMR

Sample Name:

Data Collected on:  
Yb-vnmrs700

Archive directory:

Sample directory:

FidFile: YY-6-17-naphthalene-C

Pulse Sequence: CARBON (s2pul)  
Solvent: cdcl3  
Data collected on: Apr 4 2012

Operator: yingdays

Relax. delay 0.100 sec  
Pulse 45.0 degrees  
Acq. time 1.468 sec  
Width 44642.9 Hz  
240 repetitions  
OBSERVE C13, 175.9539809 MHz  
DECOUPLE H1, 699.7602734 MHz  
Power 46 dB  
continuously on  
WALTZ 16 modulated  
DATA PROCESSING  
Line broadening 1.0 Hz  
FT size 131072  
Total time 6 min 16 sec

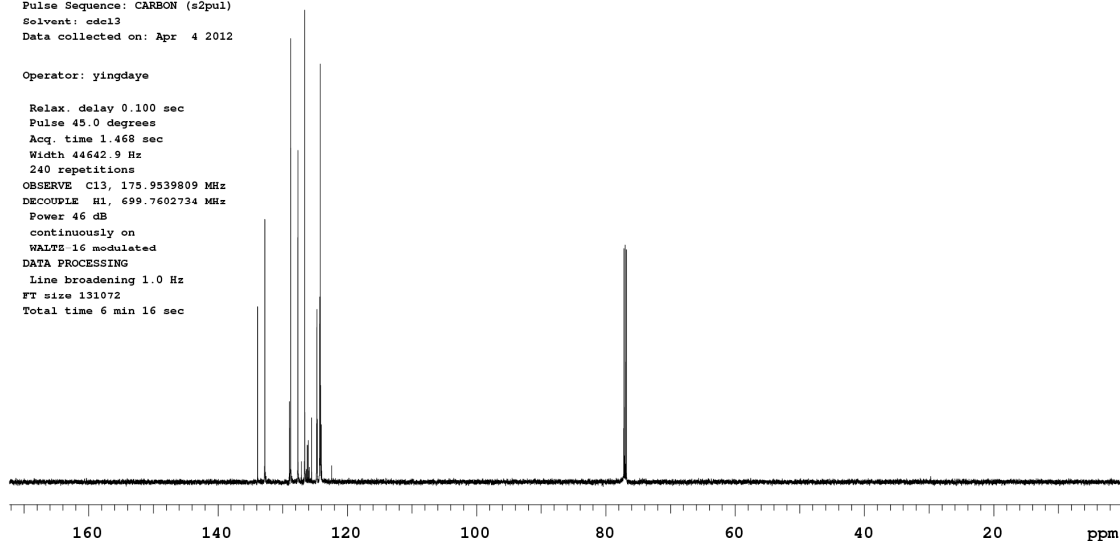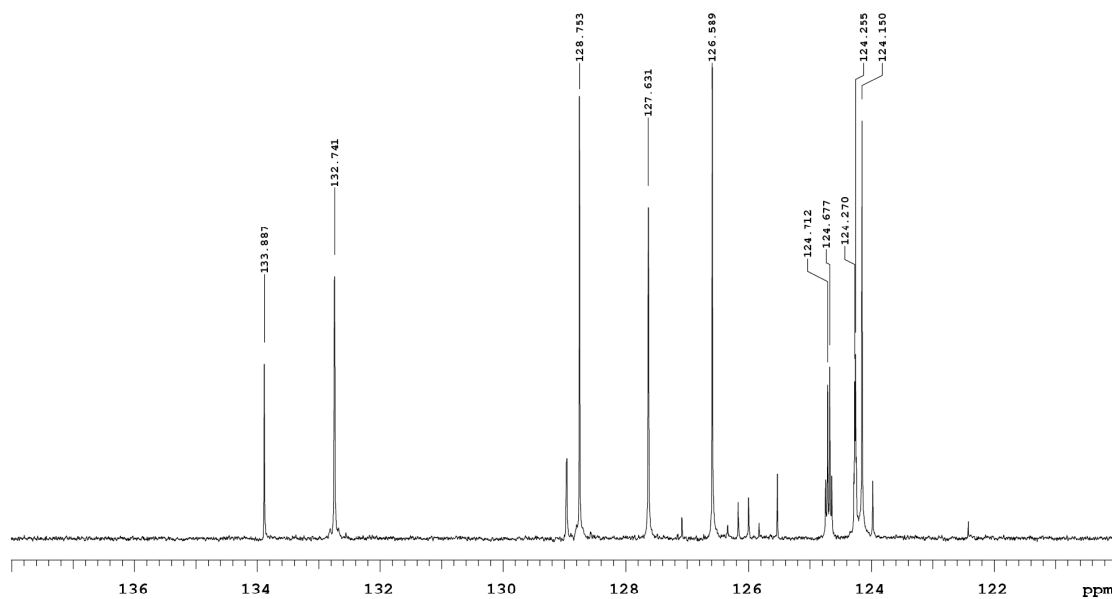

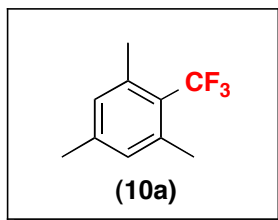

# <sup>1</sup>H NMR

Sample Name:

Data Collected on:  
Ga.Chem.LSA.UMich.edu-vnmrs400  
Archive directory:

Sample directory:

FidFile: YY-6-17-G-mesitylene-R

Pulse Sequence: PROTON (s2pul)  
Solvent: cdcl3  
Data collected on: Mar 23 2012

Operator: yingdaye

Relax. delay 0.500 sec  
Pulse 45.0 degrees  
Acq. time 3.500 sec  
Width 6377.6 Hz  
8 repetitions  
OBSERVE H1, 399.5337067 MHz  
DATA PROCESSING  
Line broadening 0.3 Hz  
FT size 65536  
Total time 0 min 40 sec

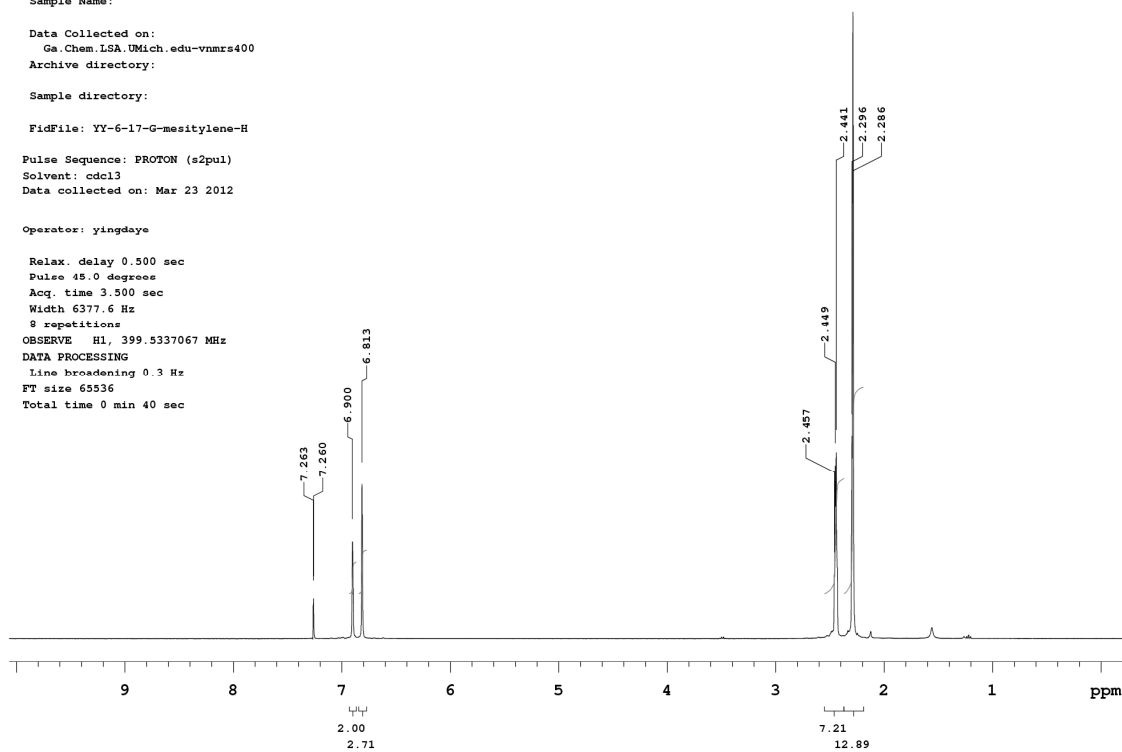

<sup>19</sup>F NMR

Sample Name:

Data Collected on:  
Ga.Chem.LSA.UMich.edu-vnmrs400  
Archive directory:

Sample directory:

FidFile: YY-6-17-G-mesitylene-F

Pulse Sequence: FLUORINE (s2pul)  
Solvent: cdcl3  
Data collected on: Mar 23 2012

Operator: yingdays

Relax. delay 1.000 sec  
Pulse 30.0 degrees  
Acq. time 0.734 sec  
Width 89283.7 Hz  
16 repetitions  
OBSERVE F19, 375.9372972 MHz  
DATA PROCESSING  
Line broadening 0.5 Hz  
FT size 131072  
Total time 0 min 31 sec

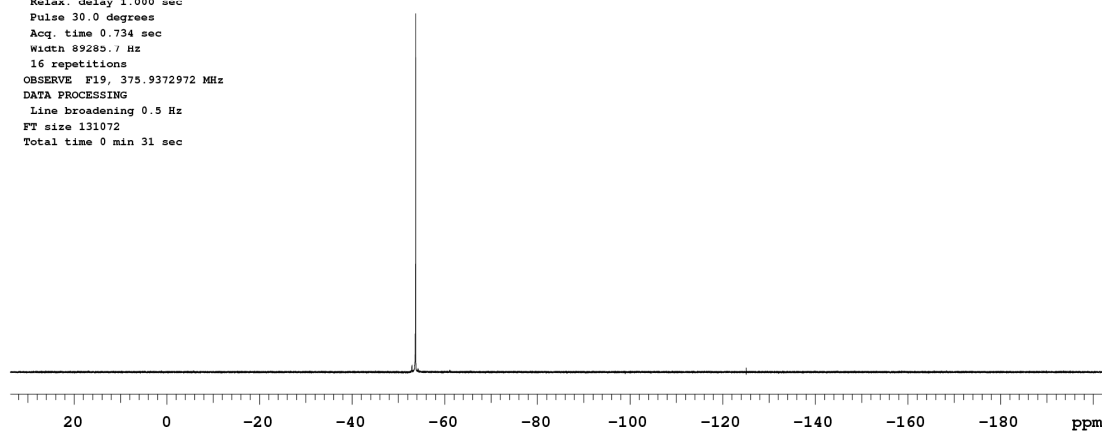

# <sup>13</sup>C NMR

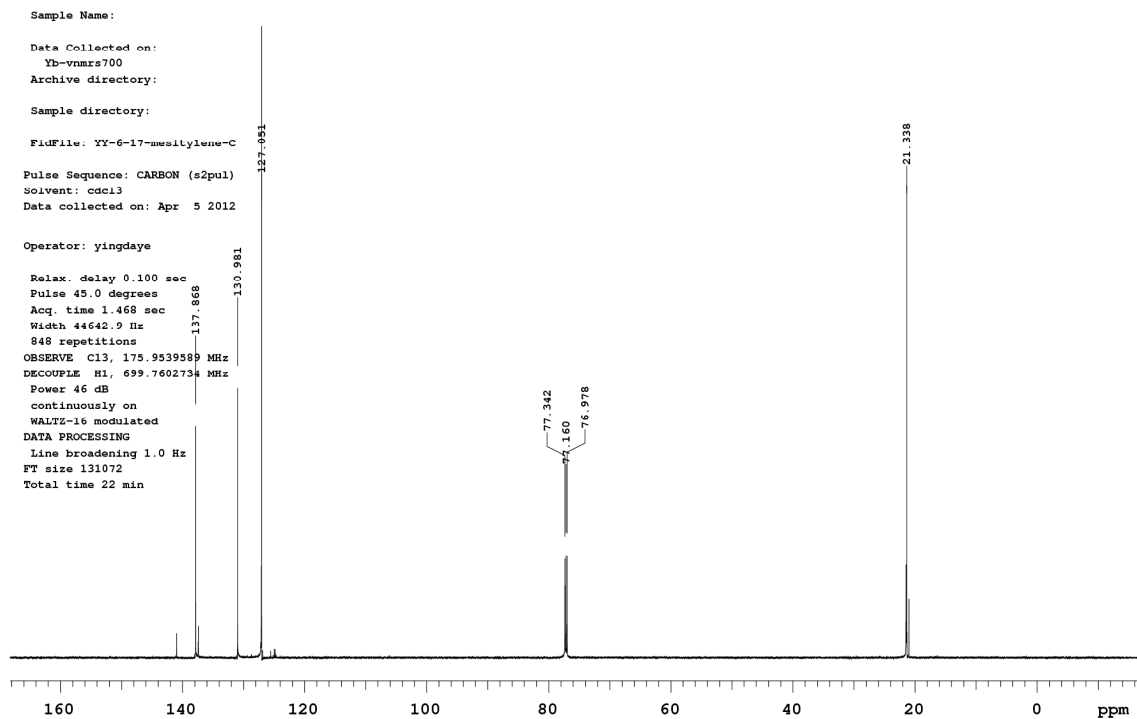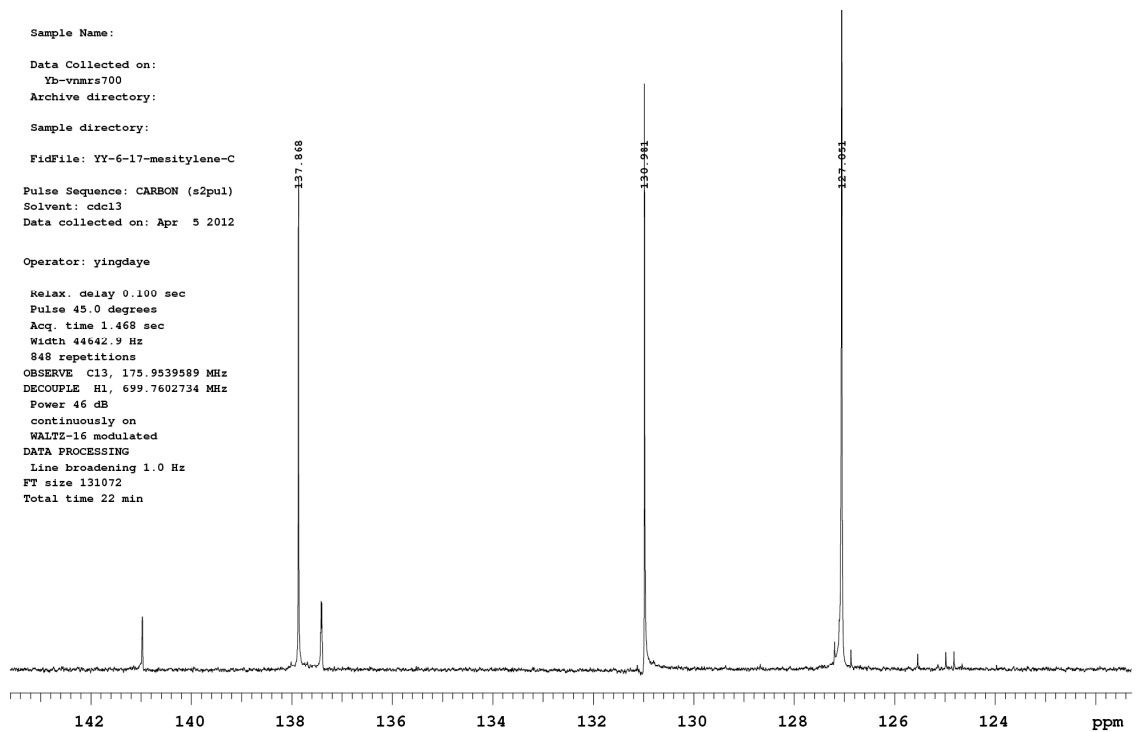

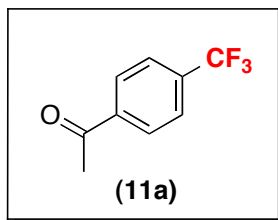

# <sup>1</sup>H NMR

Sample Name:  
 Data Collected on:  
 Sn.Chem.LSA.UMich.edu-inova500  
 Archive directory:  
 Sample directory:  
 FidFile: YY-6-17-F-acetyl-2-H  
 Pulse Sequence: PROTON (s2pul)  
 solvent: cdcl3  
 Data collected on: Mar 29 2012  
 Operator: yingdaye  
 Relax delay 0.500 sec  
 Pulse 45.0 degrees  
 Acq. time 3.500 sec  
 Width 7990.4 Hz  
 8 repetitions  
 OBSERVE H1, 499.9042609 MHz  
 DATA PROCESSING  
 Line broadening 0.3 Hz  
 FT size 65536  
 Total time 0 min 40 sec

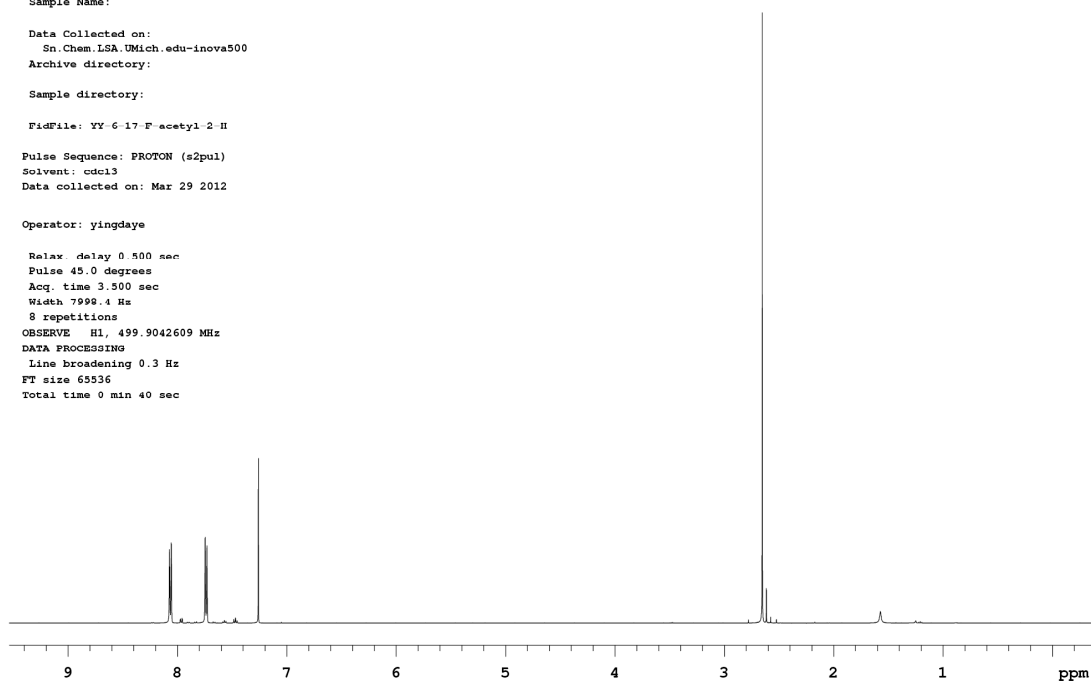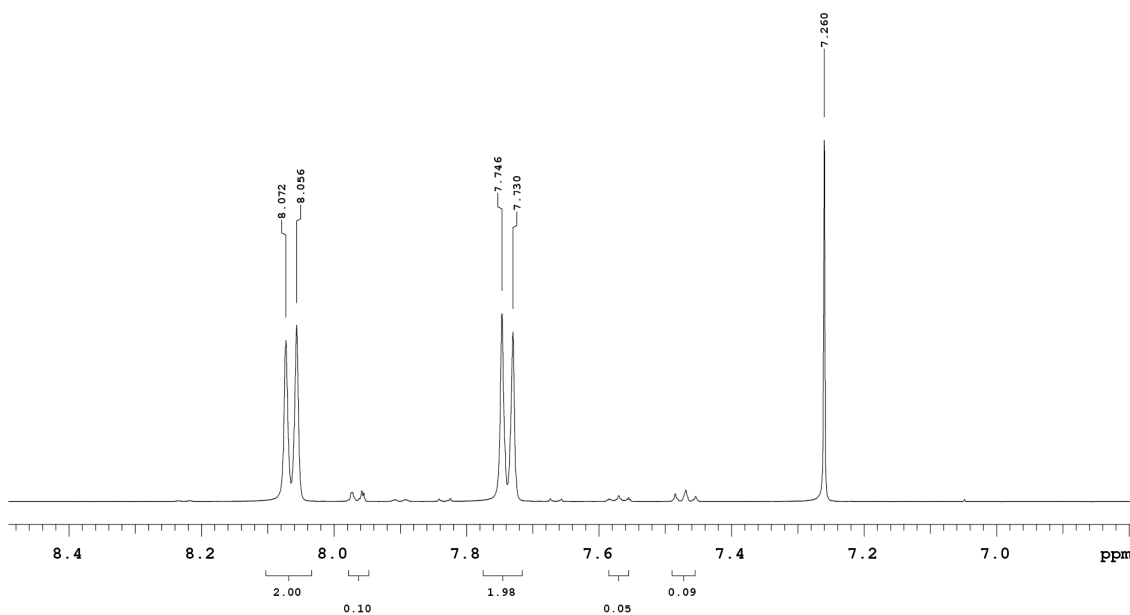

# <sup>19</sup>F NMR

Sample Name:  
Data Collected on:  
Ga.Chem.LSA.UMich.edu-vnmrs400  
Archive directory:  
Sample directory:  
FidFile: YY-6-17-F-acetyl-F  
Pulse Sequence: FLUORINE (s2pul)  
Solvent: cdcl3  
Data collected on: Mar 22 2012

Operator: yingdaye

Relax. delay 1.000 sec  
Pulse 30.0 degrees  
Acq. time 0.734 sec  
Width 89285.7 Hz  
16 repetitions  
OBSERVE F19, 375.9372972 MHz  
DATA PROCESSING  
Line broadening 0.5 Hz  
FT size 131072  
Total time 0 min 31 sec

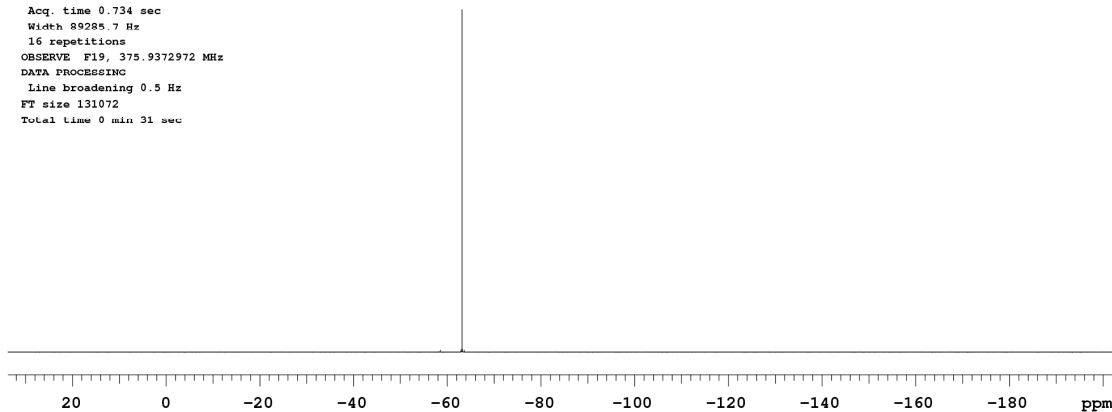

# <sup>13</sup>C NMR

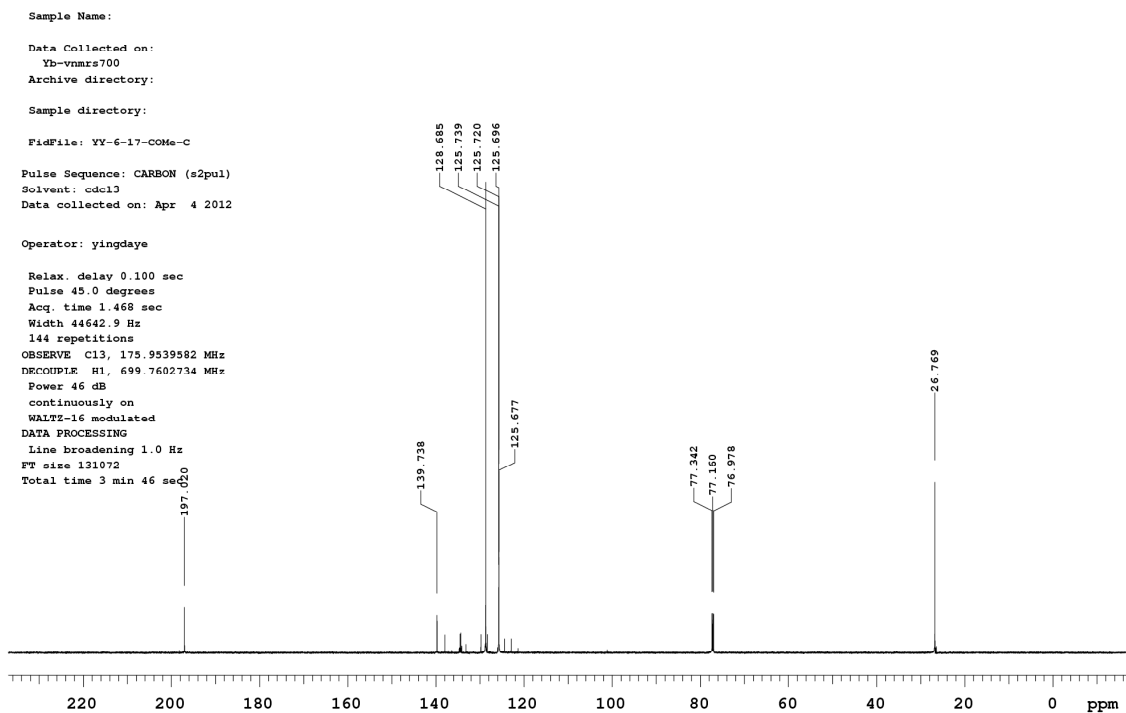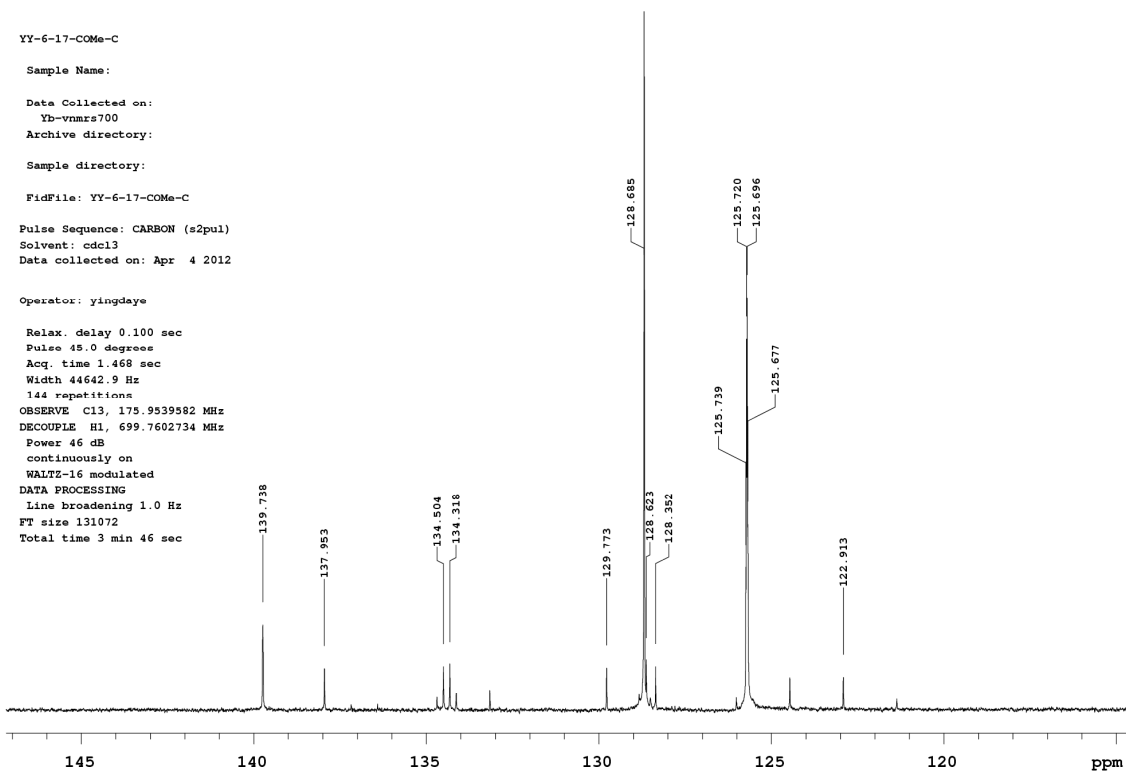

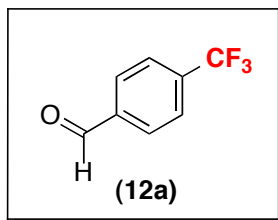

# <sup>1</sup>H NMR

Sample Name:  
 Data Collected on:  
 Yb-vnmr700  
 Archive directory:  
 Sample directory:  
 FidFile: YY-6-17-CHO-H  
 Pulse Sequence: PROTON (s2pul)  
 Solvent: cdcl3  
 Data collected on: Apr 5 2012  
 Operator: yingdaye  
 Relax. delay 0.500 sec  
 Pulse 45.0 degrees  
 Acq. time 3.500 sec  
 Width 11160.7 Hz  
 16 repetitions  
 OBSERVE H1, 699.7567678 MHz  
 DATA PROCESSING  
 Line broadening 0.3 Hz  
 FT size 131072  
 Total time 1 min 12 sec

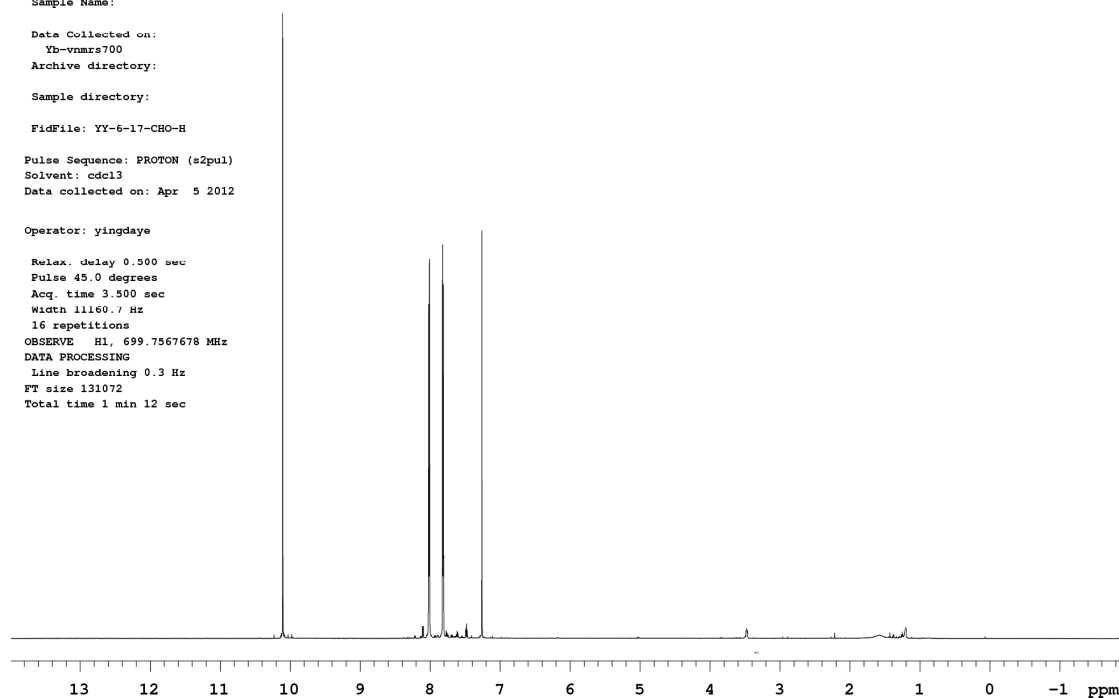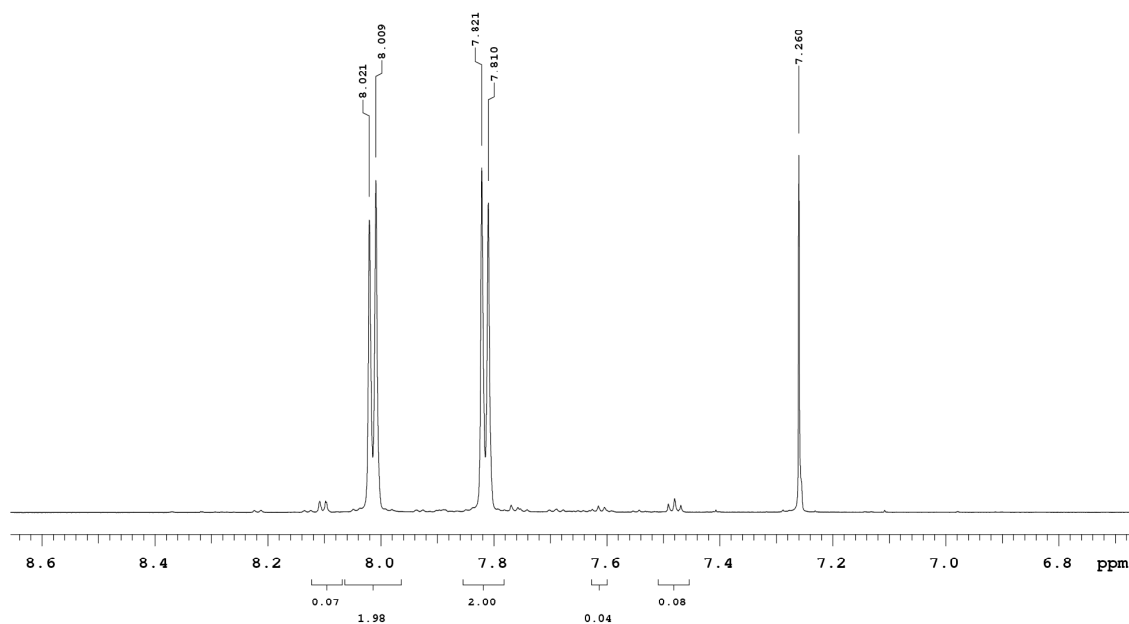

<sup>19</sup>F NMR

Sample Name:

Data Collected on:  
Ga.Chem.LSA.UMich.edu-vnmrs400  
Archive directory:

Sample directory:

FidFile: YY-6-17-CHO-F

Pulse Sequence: FLUORINE (s2pul)  
Solvent: cdcl3  
Data collected on: Apr 6 2012

Operator: yingdays

Relax. delay 1.000 sec  
Pulse 30.0 degrees  
Acq. time 0.734 sec  
Width 89285.7 Hz  
16 repetitions  
OBSERVE F19, 375.9372972 MHz  
DATA PROCESSING  
Line broadening 0.5 Hz  
FT size 131072  
Total time 0 min 31 sec

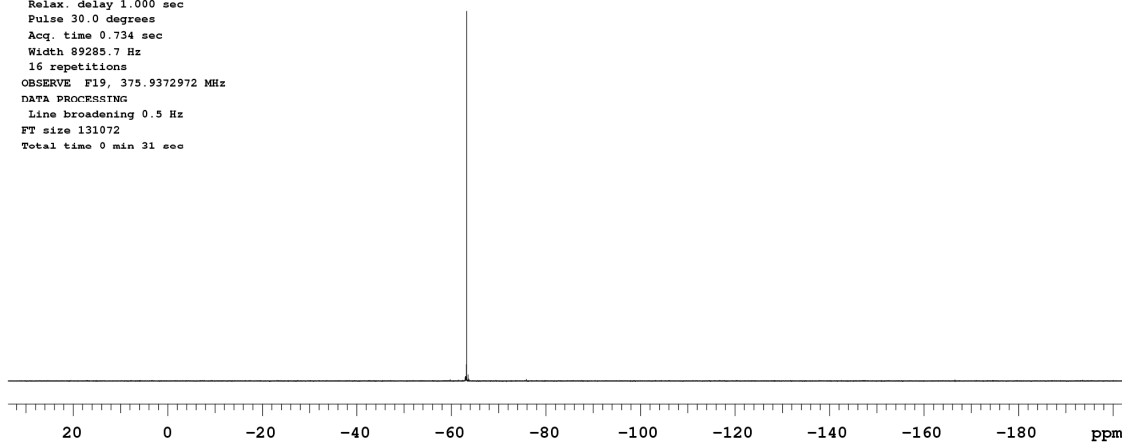

# <sup>13</sup>C NMR

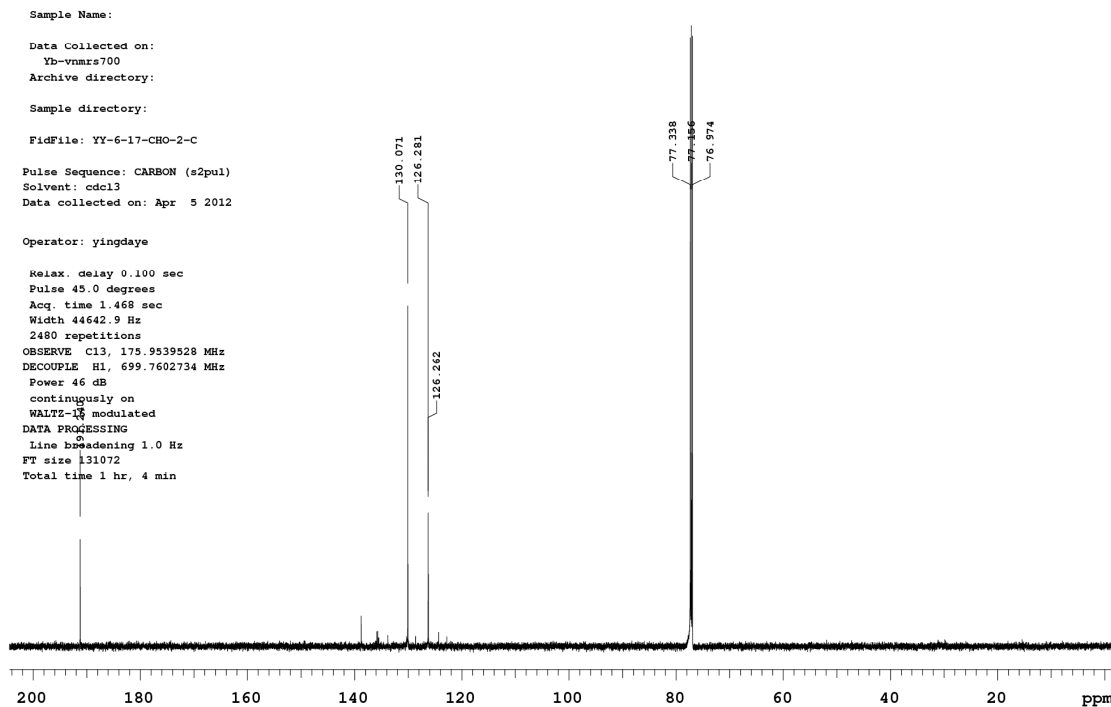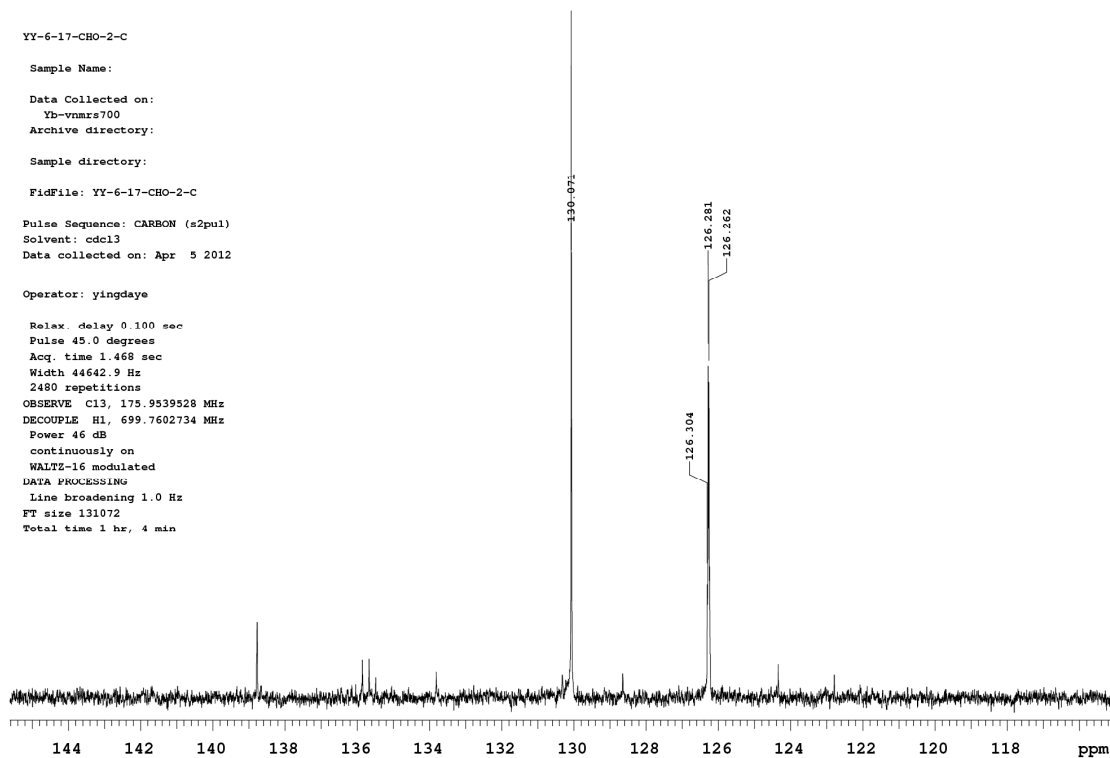

Supplement: NIHMS380571-supplement-1_si_001.pdf [file NIHMS380571-supplement-1_si_001.pdf]
